# Supplementary material for: Iminyl radical-promoted imino sulfonylation, imino cyanogenation and imino thiocyanation of γ,δ-unsaturated oxime esters: synthesis of versatile functionalized pyrrolines
Source: Royal Society of Chemistry journal article supplement (doi:10.1039/c9qo00421a), 2019-01-01

# Supporting Information

## **Iminyl Radical-Promoted Imino Sulfonylation, Imino Cyanogenation and Imino Thiocyanation of $\gamma$ , $\delta$ -Unsaturated Oxime Esters: Synthesis of Versatile Functionalized Pyrrolines**

Yuebo Wang, Jie Ding, Jinghui Zhao, Wan Sun, Chang Lian, Chen Chen\*  
and Bolin Zhu\*

*Tianjin Key Laboratory of Structure and Performance for Functional Molecules, MOE Key Laboratory  
of Inorganic-Organic Hybrid Functional Material Chemistry, College of Chemistry, Tianjin Normal  
University, Tianjin 300387, P. R. China.*

E-mail: [hxycc@tjnu.edu.cn](mailto:hxycc@tjnu.edu.cn); [hxyzb1@tjnu.edu.cn](mailto:hxyzb1@tjnu.edu.cn).

## **Table of Contents**

|                                                                                  |          |
|----------------------------------------------------------------------------------|----------|
| <b>General Information:</b>                                                      | -----S02 |
| <b>Preparation of Starting Materials:</b>                                        | -----S02 |
| <b>Characterization of Starting Materials:</b>                                   | -----S06 |
| <b>General Procedures for the Synthesis of Imino-Functionalization Products:</b> | -----S09 |
| <b>Mechanistic Studies:</b>                                                      | -----S10 |
| <b>Derivatization:</b>                                                           | -----S12 |
| <b>Characterization of Products:</b>                                             | -----S13 |
| <b>NMR Spectra:</b>                                                              | -----S30 |

## General Information:

The  $^1\text{H}$  NMR,  $^{19}\text{F}$  NMR and  $^{13}\text{C}$  NMR were recorded with Bruker 400 MHz spectrometer instruments in  $\text{CDCl}_3$ . The chemical shifts ( $\delta$ ) of  $^1\text{H}$  NMR and  $^{13}\text{C}$  NMR were measured in ppm, referenced to residual  $^1\text{H}$  and  $^{13}\text{C}$  signals of nondeuterated  $\text{CDCl}_3$  ( $\delta = 7.26$  and  $77.00$ ), as internal standards. All solvents were obtained from commercial sources and were purified according to standard procedures. Purification of products was accomplished by flash chromatography using silica gel (200~300 mesh). Thin layer chromatography (TLC) was performed on Merck silica gel GF254 plates and visualized by UV-light (254 nm). Melting points were obtained on a Yanaco-241 apparatus and are uncorrected. HRMS were recorded on VG ZAB-HS mass spectrometer with ESI resource.

## Preparation of Starting Materials:

### General Procedure 1:

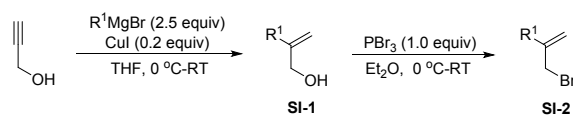

To a stirred solution of propargyl alcohol (1.0 equiv) in anhydrous THF under  $\text{N}_2$ , was added  $\text{CuI}$  (0.2 equiv). The resulting suspension was cooled to  $0\text{ }^\circ\text{C}$ .  $\text{R}^1\text{MgBr}$  (2.5 equiv) in anhydrous THF, which was freshly prepared from  $\text{Mg}$  and  $\text{R}^1\text{Br}$ , was added via cannula, at such a rate as to maintain the temperature below  $10\text{ }^\circ\text{C}$ . The reaction was allowed to warm slowly to room temperature overnight. The reaction was again cooled to  $0\text{ }^\circ\text{C}$ , and then was treated with  $\text{H}_2\text{O}$  to give a light green suspension. Then it was treated with  $\text{EtOAc}$ . After treatment with 1 M hydrochloric acid, a green gelatinous precipitate was formed, which was thoroughly extracted with  $\text{EtOAc}$ . The combined organic layers were dried on  $\text{Na}_2\text{SO}_4$ . After removing the solvent, the residue was purified by column chromatography to give **SI-1**. (*Angew. Chem., Int. Ed.* **2015**, *54*, 3092.)

To a solution of the appropriate alcohol (1.0 equiv) in anhydrous  $\text{Et}_2\text{O}$  at  $0\text{ }^\circ\text{C}$  was added  $\text{PBr}_3$  (1.0 equiv). The solution was warmed to room temperature and stirred for

7 hours. The reaction was cooled to 0 °C and water was added. The organic portion was isolated, washed with brine, dried and concentrated in vacuum to afford **SI-2**, which was used in the next step without further purification. (*Angew. Chem., Int. Ed.* **2015**, *54*, 3092.)

### General Procedure 2:

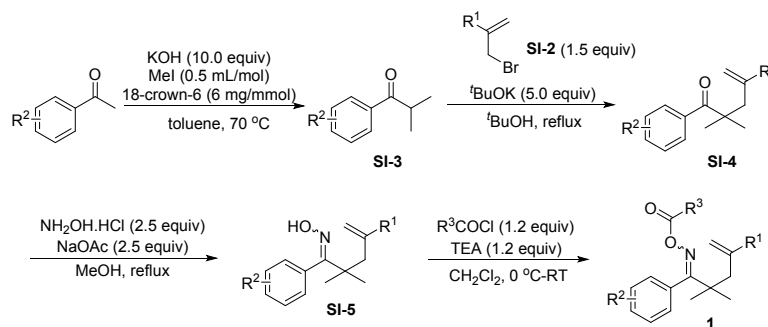

To a stirred suspension of KOH (10.0 equiv) in toluene (1 mL/mol) containing of acetophenone (1.0 equiv) and 18-crown-6 (6 mg/mmol) was added  $CH_3I$  (0.5 mL/mol) dropwise. The mixture was stirred at 70 °C for 24 h. After cooling to room temperature, separation of the solid phase by filtration and evaporation of the toluene. The remainder was purified by column chromatography on silica gel to afford corresponding products **SI-3**. (*Org. Lett.* **2017**, *19*, 5940.)

To a solution of **SI-3** (1.0 equiv) in anhydrous  $t$ BuOH (3.0 mL/mmol) was added  $KO^tBu$  (5.0 equiv) and the mixture was stirred at room temperature for 5 minutes. Then, **SI-2** (1.5 equiv) was added via syringe and the mixture was heated at 90 °C for 16 hours. The mixture was cooled to room temperature and  $H_2O$  was added. The mixture was extracted with EtOAc. The organic extracts were combined, washed with brine, dried with  $Na_2SO_4$  and concentrated in vacuum. The residue was purified by column chromatography to give **SI-4**. (*Angew. Chem., Int. Ed.* **2015**, *54*, 3092.)

$H_2NOH \cdot HCl$  (2.5 equiv) and NaOAc (2.5 equiv) were added to a solution of **SI-4** (1.0 equiv) in MeOH (4.0 mL/mmol) in a round-bottomed flask which was fitted with a reflux condenser. The mixture was heated at 80 °C until consumption of starting material was observed by TLC. After cooling to room temperature, the mixture was diluted with EtOAc, washed with brine, dried with  $Na_2SO_4$  and concentrated in vacuum to give **SI-5**, which was used for the next step without further purification.

(*Angew. Chem., Int. Ed.* **2015**, *54*, 3092.)

To a solution of **SI-5** (1.0 equiv) in anhydrous DCM (4 mL/mmol) at 0 °C was added Et<sub>3</sub>N (1.2 equiv) followed by R<sup>3</sup>COCl (1.2 equiv) dropwise via syringe. The mixture was then warmed to room temperature and stirred until the reaction was complete as observed by TLC. MeOH (1.0 mL/mmol) was then added and the mixture stirred for further 10 minutes. The mixture was diluted with DCM, washed with brine, dried with Na<sub>2</sub>SO<sub>4</sub> and concentrated in vacuum. The residue was purified by column chromatograph to afford **1**. (*Angew. Chem., Int. Ed.* **2015**, *54*, 3092.)

### General Procedure 3:

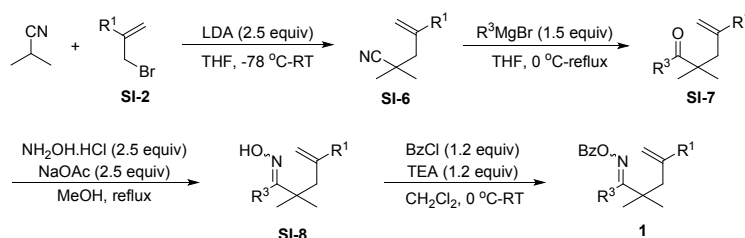

To a 100 mL flame-dried round-bottomed flask equipped with a stirring bar was added diisopropylamine (2.5 equiv) and n-BuLi (2.5 equiv) in THF, and the reaction mixture was stirred at 0 °C for 30 min. Then nitriles (1.0 equiv) was slowly added at -78 °C. After stirring for 1 h, **SI-2** (1.2 equiv) was added dropwise and the reaction mixture was allowed to warm up to room temperature while stirring overnight. The reaction was quenched with saturated aqueous NH<sub>4</sub>Cl solution. Organic materials were then extracted three times with EtOAc. The organic phase was washed with water and brine, and dried over Na<sub>2</sub>SO<sub>4</sub>. After filtration, the solvent was evaporated to give a crude mixture, which was purified by flash column chromatography to afford **SI-6**. (*ACS Catal.* **2016**, *6*, 5571.)

To a 100 mL flame-dried round-bottomed flask equipped with a stirring bar was added **SI-6** (1.0 equiv). It was solubilized in anhydrous THF (0.25 M). The solution was cooled to 0 °C and R<sup>3</sup>MgBr (1.5 equiv) was slowly added to the reaction flask. Then, the mixture was stirred overnight in a sealed tube at 60 °C. After cooling down to 0 °C, reaction was quenched with 3 N HCl (aq.) and warmed up for 4 h to finish the hydrolysis. The crude mixture was then extracted with EtOAc, washed with brine, dried over Na<sub>2</sub>SO<sub>4</sub> and concentrated. The crude product was purified by flash column

chromatography to give **SI-7**. (*ACS Catal.* **2016**, *6*, 5571.)

(Note: The remaining procedure follows the **General Procedure 2**, step 3 and step 4.)

#### General Procedure 4:

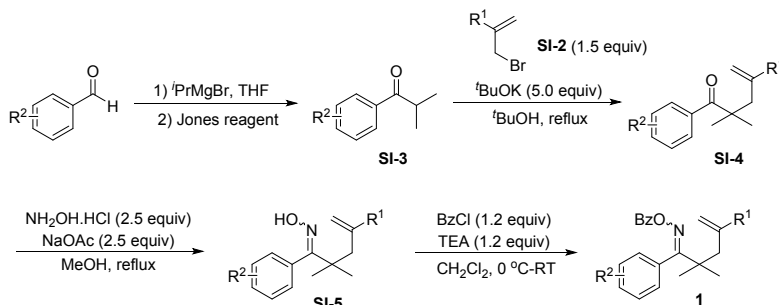

To a magnetically stirred aldehyde (1.0 equiv), was added isopropylmagnesium bromide (1.5 equiv), which was prepared from magnesium (1.5 equiv) and isopropyl bromide (1.5 equiv). The reaction mixture was stirred at RT for 36 h. Then, it was poured into saturated aqueous  $NH_4Cl$  solution and the aqueous layer was extracted with EtOAc. The combined organic layers were dried with  $Na_2SO_4$  and concentrated in vacuo. The crude secondary alcohol was purified by column chromatography on silica using petroleum ether/ethyl acetate as eluent.

A solution of secondary alcohol (1.0 equiv) in  $^tBuOMe$  was stirred at  $0\text{ }^\circ\text{C}$  while Jones reagent (4.0 equiv) was added dropwise. The resulting mixture was allowed to warm to room temperature and stirred overnight. The  $^tBuOMe$  layer was then separated from the aqueous layer, which was extracted with EtOAc for 3 times. The combined organic layers were washed with brine, dried over  $Na_2SO_4$ , filtered and concentrated in vacuo. The crude ketone product **SI-3** was directly used in the next step without further purification.

(Note: The remaining procedure follows the **General Procedure 2**, step 2, step 3 and step 4.)

## Characterization of Starting Materials (New Compounds):

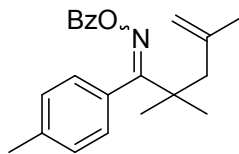

2,2,4-trimethyl-1-(p-tolyl)pent-4-en-1-one O-benzoyl oxime (**1b**) was Synthesized by **General Procedure 3**, appearance: yellow oil;  $R_f$ : 0.3 (PE:EA, 20:1).  $^1\text{H}$  NMR (400 MHz,  $\text{CDCl}_3$ )  $\delta$  7.55 (dd,  $J = 8.3, 1.3$  Hz, 2H), 7.43 – 7.39 (m, 1H), 7.26 – 7.19 (m, 4H), 7.03 (d,  $J = 8.1$  Hz, 2H), 4.94 – 4.91 (m, 1H), 4.82 (d,  $J = 0.9$  Hz, 1H), 2.37 (s, 3H), 2.35 (s, 2H), 1.79 (s, 3H), 1.28 (s, 6H).  $^{13}\text{C}$  NMR (101 MHz,  $\text{CDCl}_3$ )  $\delta$  175.11, 163.48, 142.01, 137.78, 132.68, 130.33, 130.15, 129.14, 128.45, 128.07, 126.46, 114.87, 46.68, 41.32, 26.16, 25.15, 21.10. ESI-MS: Calcd for  $\text{C}_{22}\text{H}_{25}\text{NO}_2$ :  $[\text{M}+\text{H}^+]$  336.1958, found 336.1959.

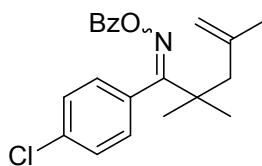

1-(4-chlorophenyl)-2,2,4-trimethylpent-4-en-1-one O-benzoyl oxime (**1c**) was Synthesized by **General Procedure 2**, appearance: yellow oil;  $R_f$ : 0.6 (PE:EA, 10:1).  $^1\text{H}$  NMR (400 MHz,  $\text{CDCl}_3$ )  $\delta$  7.67 – 7.63 (m, 1H), 7.52 – 7.49 (m, 2H), 7.44 – 7.41 (m, 2H), 7.29 (dd,  $J = 11.0, 4.5$  Hz, 2H), 7.16 – 7.09 (m, 2H), 4.99 – 4.93 (m, 1H), 4.86 (d,  $J = 0.9$  Hz, 1H), 2.35 (s, 2H), 1.81 (s, 3H), 1.31 (s, 6H).  $^{13}\text{C}$  NMR (101 MHz,  $\text{CDCl}_3$ )  $\delta$  173.89, 163.27, 141.85, 134.37, 134.27, 132.91, 131.65, 130.38, 129.15, 128.23, 128.11, 115.06, 46.77, 41.40, 26.24, 25.17. ESI-MS: Calcd for  $\text{C}_{21}\text{H}_{22}\text{ClNO}_2$ :  $[\text{M}+\text{H}^+]$  356.1412, found 356.1413.

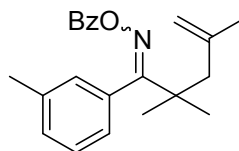

2,2,4-trimethyl-1-(m-tolyl)pent-4-en-1-one O-benzoyl oxime (**1d**) was Synthesized by **General Procedure 2**, appearance: yellow oil;  $R_f$ : 0.5 (PE:EA, 10:1).  $^1\text{H}$  NMR (400 MHz,  $\text{CDCl}_3$ )  $\delta$  7.52 (dd,  $J = 8.3, 1.2$  Hz, 2H), 7.41 – 7.37 (m, 1H), 7.28 (t,  $J = 7.9$  Hz, 1H), 7.24 – 7.16 (m, 3H), 6.95 – 6.91 (m, 2H), 4.93 – 4.91 (m,

1H), 4.82 (d,  $J = 0.9$  Hz, 1H), 2.36 (s, 2H), 2.34 (s, 3H), 1.79 (s, 3H), 1.28 (s, 6H).  $^{13}\text{C}$  NMR (101 MHz,  $\text{CDCl}_3$ )  $\delta$  174.92, 163.33, 141.94, 137.33, 133.06, 132.64, 130.26, 129.06, 128.64, 128.01, 127.65, 126.92, 123.62, 114.90, 46.63, 41.19, 26.13, 25.11, 21.25. ESI-MS: Calcd for  $\text{C}_{22}\text{H}_{25}\text{NO}_2$ :  $[\text{M}+\text{H}^+]$  336.1958, found 336.1960.

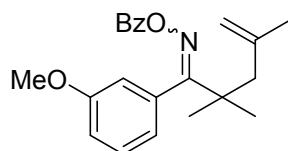

1-(3-methoxyphenyl)-2,2,4-trimethylpent-4-en-1-one O-

benzoyl oxime (**1e**) was Synthesized by **General Procedure 3**, appearance: yellow oil;  $R_f$ : 0.2 (PE:EA, 20:1).  $^1\text{H}$  NMR (400 MHz,  $\text{CDCl}_3$ )  $\delta$  7.58 (d,  $J = 7.4$  Hz, 2H), 7.46 (t,  $J = 7.4$  Hz, 1H), 7.35 (t,  $J = 7.9$  Hz, 1H), 7.29 (t,  $J = 7.7$  Hz, 2H), 6.94 (dd,  $J = 8.3$ , 2.5 Hz, 1H), 6.75 (d,  $J = 7.6$  Hz, 1H), 6.71 (s, 1H), 4.96 (s, 1H), 4.86 (s, 1H), 3.81 (s, 3H), 2.39 (s, 2H), 1.83 (s, 3H), 1.32 (s, 9H).  $^{13}\text{C}$  NMR (101 MHz,  $\text{CDCl}_3$ )  $\delta$  174.83, 163.64, 159.11, 142.22, 134.60, 132.89, 129.37, 129.11, 129.04, 128.27, 119.26, 115.09, 113.59, 112.47, 55.31, 46.90, 41.48, 26.36, 25.36. ESI-MS: Calcd for  $\text{C}_{22}\text{H}_{25}\text{NO}_3$ :  $[\text{M}+\text{H}^+]$  352.1907, found 352.1911.

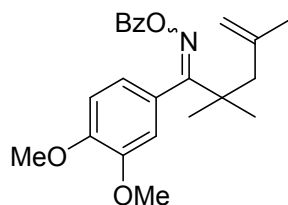

1-(3,4-dimethoxyphenyl)-2,2,4-trimethylpent-4-en-1-one O-

benzoyl oxime (**1f**) was Synthesized by **General Procedure 4**, appearance: white solid; M.p.: 85-88 °C.  $R_f$ : 0.8 (PE:EA, 5:1).  $^1\text{H}$  NMR (400 MHz,  $\text{CDCl}_3$ )  $\delta$  7.62 – 7.57 (m, 2H), 7.45 – 7.40 (m, 1H), 7.26 (t,  $J = 7.8$  Hz, 2H), 6.90 (d,  $J = 8.2$  Hz, 1H), 6.73 – 6.67 (m, 2H), 4.95 – 4.92 (m, 1H), 4.85 (s, 1H), 3.89 (s, 3H), 3.81 (s, 3H), 2.34 (s, 2H), 1.79 (s, 3H), 1.30 (s, 6H).  $^{13}\text{C}$  NMR (101 MHz,  $\text{CDCl}_3$ )  $\delta$  174.63, 163.54, 148.59, 148.23, 142.11, 132.77, 129.13, 128.85, 128.16, 125.43, 119.20, 114.74, 110.35, 110.09, 55.78, 55.66, 46.82, 41.51, 26.32, 25.16. ESI-MS: Calcd for  $\text{C}_{23}\text{H}_{27}\text{NO}_4$ :  $[\text{M}+\text{H}^+]$  382.2013, found 382.2014.

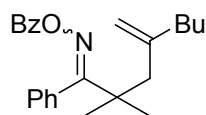

2,2-dimethyl-4-methylene-1-phenyloctan-1-one O-benzoyl oxime (**1d**) was Synthesized by **General Procedures 1 and 2**, appearance: yellow oil;  $R_f$ : 0.5 (PE:EA, 20:1).  $^1\text{H}$  NMR (400 MHz,  $\text{CDCl}_3$ )  $\delta$  7.52 (dd,  $J = 8.4, 1.3$  Hz, 2H), 7.45 – 7.38 (m, 4H), 7.27 – 7.22 (m, 2H), 7.18 – 7.13 (m, 2H), 4.96 (d,  $J = 1.5$  Hz, 1H), 4.92 (s, 1H), 2.34 (s, 2H), 2.05 – 2.00 (m, 2H), 1.43 – 1.37 (m, 2H), 1.31 (s, 6H), 1.28 – 1.24 (m, 2H), 0.88 (d,  $J = 7.3$  Hz, 3H).  $^{13}\text{C}$  NMR (101 MHz,  $\text{CDCl}_3$ )  $\delta$  175.28, 163.54, 146.12, 133.38, 132.83, 129.27, 129.00, 128.20, 127.92, 126.66, 113.46, 44.92, 41.53, 38.17, 30.29, 26.19, 22.39, 13.96. ESI-MS: Calcd for  $\text{C}_{24}\text{H}_{29}\text{NO}_2$ :  $[\text{M}+\text{H}^+]$  364.2271, found 364.2272.

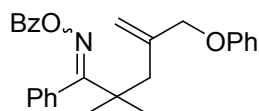

2,2-dimethyl-4-(phenoxyethyl)-1-phenylpent-4-en-1-one O-benzoyl oxime (**1f**) was Synthesized by **General Procedure 2**, appearance: yellow oil;  $R_f$ : 0.6 (PE:EA, 5:1).  $^1\text{H}$  NMR (400 MHz,  $\text{CDCl}_3$ )  $\delta$  7.52 (dd,  $J = 8.3, 1.2$  Hz, 2H), 7.43 – 7.38 (m, 4H), 7.23 (ddd,  $J = 7.3, 6.8, 4.2$  Hz, 4H), 7.19 – 7.14 (m, 2H), 6.94 – 6.86 (m, 3H), 5.42 (d,  $J = 1.3$  Hz, 1H), 5.25 (s, 1H), 4.54 (s, 2H), 2.55 (s, 2H), 1.34 (s, 6H).  $^{13}\text{C}$  NMR (101 MHz,  $\text{CDCl}_3$ )  $\delta$  174.61, 163.48, 158.43, 141.21, 133.07, 132.86, 129.29, 129.23, 128.79, 128.27, 128.17, 127.96, 126.59, 120.66, 116.78, 114.67, 71.68, 42.19, 41.30, 26.52. ESI-MS: Calcd for  $\text{C}_{27}\text{H}_{27}\text{NO}_3$ :  $[\text{M}+\text{H}^+]$  414.2064, found 414.2066.

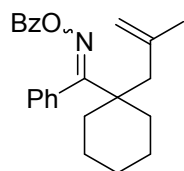

(1-(2-methylallyl)cyclohexyl)(phenyl)methanone O-benzoyl oxime (**1g**) was Synthesized by **General Procedure 2**, appearance: yellow oil;  $R_f$ : 0.4 (PE:EA, 20:1).  $^1\text{H}$  NMR (400 MHz,  $\text{CDCl}_3$ )  $\delta$  7.54 (dd,  $J = 8.3, 1.3$  Hz, 2H), 7.46 – 7.38 (m, 4H), 7.28 – 7.22 (m, 4H), 4.97 (d,  $J = 1.5$  Hz, 1H), 4.95 (s, 1H), 2.38 (s, 2H), 2.05 – 1.98 (m, 2H), 1.84 (s, 3H), 1.73 – 1.63 (m, 3H), 1.59 – 1.53 (m, 5H).  $^{13}\text{C}$  NMR (101

MHz, CDCl<sub>3</sub>)  $\delta$  173.43, 163.60, 141.90, 133.27, 132.82, 129.31, 129.09, 128.25, 128.22, 127.91, 126.82, 114.92, 45.14, 34.25, 31.91, 29.35, 25.95, 25.47, 22.68, 22.46. ESI-MS: Calcd for C<sub>24</sub>H<sub>27</sub>NO<sub>2</sub>: [M+H<sup>+</sup>] 362.2115, found 362.2116.

## General Procedures for the Synthesis of Imino-Functionalization Products:

### General Procedure for Iminosulfonylation:

In a 38 mL sealed tube, the mixture of  $\gamma$ ,  $\delta$ -unsaturated oxime **1** (0.2 mmol), sodium sulfinate **2** (0.4 mmol), Cu(OAc)<sub>2</sub> (36.3 mg, 0.2 mmol) were dissolved in anhydrous MeCN (2.0 mL). Then, the reaction mixture was thoroughly degassed by vacuum purge-and-refill with N<sub>2</sub>. The reaction mixture was heated to 90 °C for 2 h. When the reaction was finished, the mixture was cooled to room temperature and the solvents were removed under reduced pressure. The residue was purified by column chromatography on silica gel (EtOAc/Petroleum Ether) to give the iminosulfonylation products **3**.

### General Procedure for Iminocyanogenation:

In a 38 mL sealed tube, the mixture of  $\gamma$ ,  $\delta$ -unsaturated oxime **1** (0.2 mmol), CuCN (44.8 mg, 0.5 mmol) were dissolved in anhydrous MeCN (2.0 mL). Then, the reaction mixture was thoroughly degassed by vacuum purge-and-refill with N<sub>2</sub>. The reaction mixture was heated to 90 °C for 2.5 h. When the reaction was finished, the mixture was cooled to room temperature and the solvents were removed under reduced pressure. The residue was purified by column chromatography on silica gel (EtOAc/Petroleum Ether) to give the iminocyanogenation products **4**.

### General Procedure for Iminothiocyation:

In a 38 mL sealed tube, the mixture of  $\gamma$ ,  $\delta$ -unsaturated oxime **1** (0.2 mmol), CuSCN (60.8 mg, 0.5 mmol) were dissolved in anhydrous MeCN (2.0 mL). Then, the reaction mixture was thoroughly degassed by vacuum purge-and-refill with N<sub>2</sub>. The reaction mixture was heated to 90 °C for 2.5 h. When the reaction was finished, the mixture was cooled to room temperature and the solvents were removed under

reduced pressure. The residue was purified by column chromatography on silica gel (EtOAc/Petroleum Ether) to give the iminothiocyanation products **5**.

## Mechanistic studies:

a)

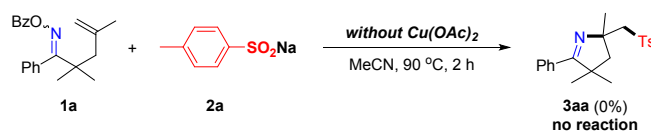

In a 38 mL sealed tube, the mixture of **1a** (64.2 mg, 0.2 mmol) and **2a** (71.2 mg, 0.4 mmol) were dissolved in anhydrous MeCN (2.0 mL). Then, the reaction mixture was thoroughly degassed by vacuum purge-and-refill with  $\text{N}_2$ . The reaction mixture was heated to 90 °C for 2 h. Thin-layer chromatography (TLC) analysis indicated that no reaction.

b)

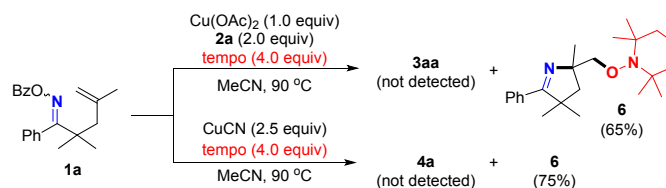

In a 38 mL sealed tube, the mixture of **1a** (64.2 mg, 0.2 mmol), **2a** (71.2 mg, 0.4 mmol),  $\text{Cu}(\text{OAc})_2$  (36.3 mg, 0.2 mmol) and TEMPO (125.0 mg, 0.8 mmol) were dissolved in anhydrous MeCN (2.0 mL). Then, the reaction mixture was thoroughly degassed by vacuum purge-and-refill with  $\text{N}_2$ . The reaction mixture was heated to 90 °C for 2.0 h. Thin-layer chromatography (TLC) analysis indicated that **3aa** was not detected and radical trapping product **6** was obtained in 65% yield. (46.3 mg, yellow oil)

In a 38 mL sealed tube, the mixture of **1a** (64.2 mg, 0.2 mmol),  $\text{CuCN}$  (44.8 mg, 0.5 mmol), TEMPO (125.0 mg, 0.8 mmol) were dissolved in anhydrous MeCN (2.0 mL). Then, the reaction mixture was thoroughly degassed by vacuum purge-and-refill with  $\text{N}_2$ . The reaction mixture was heated to 90 °C for 2.5 h. Thin-layer chromatography (TLC) analysis indicated that **4a** was not detected and radical

trapping product **6** was obtained in 75% yield. (53.4 mg, yellow oil)

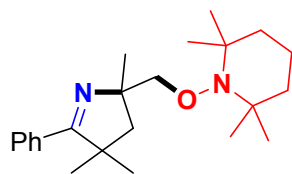

**6**: appearance: yellow oil;  $R_f$ : 0.5 (PE:EA, 5:1).  $^1\text{H}$  NMR (400 MHz,  $\text{CDCl}_3$ )  $\delta$  7.69 – 7.62 (m, 2H), 7.36 (dd,  $J$  = 5.1, 1.9 Hz, 3H), 3.92 (d,  $J$  = 8.4 Hz, 1H), 3.80 (d,  $J$  = 8.4 Hz, 1H), 2.36 (d,  $J$  = 13.0 Hz, 1H), 1.70 (d,  $J$  = 13.0 Hz, 1H), 1.44 (s, 6H), 1.35 (s, 3H), 1.34 (s, 3H), 1.25 (s, 3H), 1.20 (s, 3H), 1.14 (s, 3H), 1.09 (s, 3H).  $^{13}\text{C}$  NMR (101 MHz,  $\text{CDCl}_3$ )  $\delta$  178.01, 135.37, 128.97, 128.07, 128.01, 82.70, 72.54, 60.08, 51.93, 48.98, 39.78, 33.28, 33.12, 29.61, 27.95, 26.70, 20.64, 20.35, 17.07. ESI-MS: Calcd for  $\text{C}_{23}\text{H}_{36}\text{N}_2\text{O}$ :  $[\text{M}+\text{H}^+]$  357.2900, found 357.2905.

c)

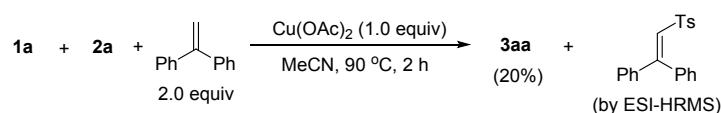

In a 38 mL sealed tube, the mixture of **1a** (64.2 mg, 0.2 mmol), **2a** (71.2 mg, 0.4 mmol),  $\text{Cu}(\text{OAc})_2$  (36.3 mg, 0.2 mmol) and 1,1-diphenylethylene (72.1 mg, 0.4 mmol) were dissolved in anhydrous MeCN (2.0 mL). Then, the reaction mixture was thoroughly degassed by vacuum purge-and-refill with  $\text{N}_2$ . The reaction mixture was heated to 90 °C for 2 h. **3aa** was obtained in 20% isolated yield and the sulfonylethyl radical coupling product could be detected by ESI-HRMS.

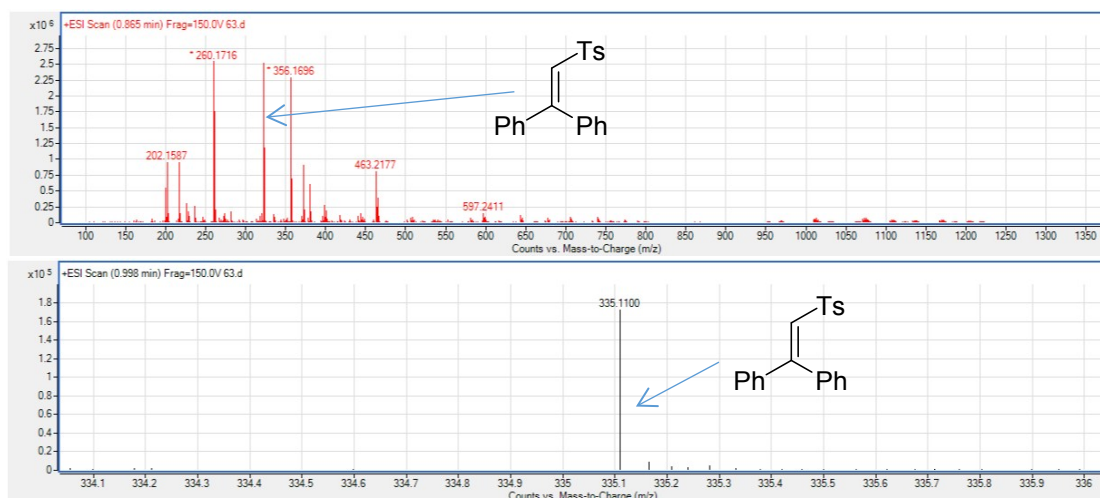

## Derivatization:

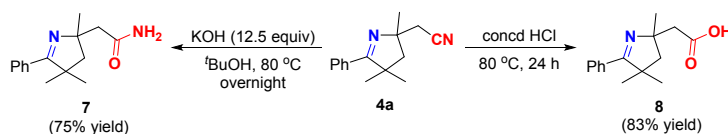

The mixture of **4a** (45.2 mg, 0.2 mmol), solid KOH (140.3 mg, 2.5 mmol) and <sup>t</sup>BuOH (1 mL) was stirred at 80 °C overnight. The reaction was cooled to room temperature and extracted with EtOAc. The combined organic layers were dried with Na<sub>2</sub>SO<sub>4</sub>, filtered, concentrated under reduced pressure. The residue was purified by column chromatography with pure EA to give the product **7** (36.6 mg, 75%) as a yellow oil. (Reference: *Org. Lett.* **2017**, *19*, 3255.)

The mixture of **4a** (45.2 mg, 0.2 mmol) and concentrated HCl (1 mL) was stirred at 80 °C for 24 h. The reaction was quenched by NaOH (2 M) and aqueous layer was washed with EtOAc, then the aqueous layer was acidified by HCl (2 M), and extracted with EtOAc. Collected organic layers were dried over anhydrous Na<sub>2</sub>SO<sub>4</sub>, and solvent was evaporated under reduced pressure. The residue was purified by column chromatography with petroleum ether/EA (2:1) to give the product **8** (40.7 mg, 83%) as a slight yellow oil. (Reference: *Org. Lett.* **2017**, *19*, 3255.)

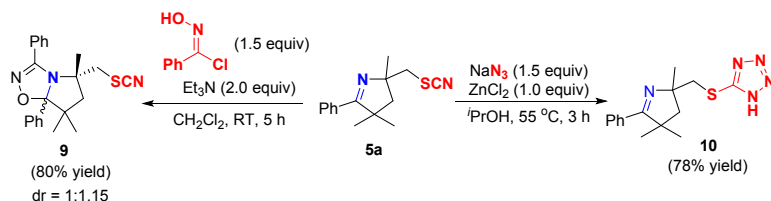

To a 50 mL round-bottom flask equipped with a magnetic stirring bar were added **5a** (64.5 mg, 0.25 mmol), N-hydroxybenzimidoyl chloride (59 mg, 0.38 mmol), Et<sub>3</sub>N (51 mg, 0.5 mmol) and CH<sub>2</sub>Cl<sub>2</sub> (4.0 mL). The mixture was stirred at RT for 5 h. The solvent was removed in vacuo, and the crude product was purified by column chromatography using Petroleum Ether/EA (30:1) to give the product **9** (75.4 mg, 80%) as a white solid. (Reference: *ACS Catal.* **2017**, *7*, 8441)

To a 38 mL oven-dried Sealed tube was charged with **5a** (51.6 mg, 0.2 mmol), ZnCl<sub>2</sub> (27.3 mg, 0.2 mmol), and NaN<sub>3</sub> (19.5 mg, 0.3 mmol). <sup>i</sup>PrOH (1 mL) was then injected into the tube by syringe. The resulting mixture was then heated to 55 °C and stirred

vigorously for 3 h. Upon completion of the reaction, the mixture was diluted with EtOAc. The solvent was then removed under reduced pressure. The crude product was isolated by column chromatography with pure EA to give the product **10** (47.0 mg, 78%) as a white solid. (Reference: *Asian J. Org. Chem.* **2017**, 6, 682)

## Characterization of Catalytic Products:

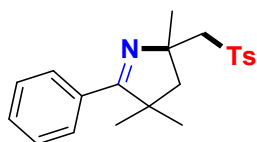

**3aa**: yield: 72%, 51.1 mg; appearance: yellow oil;  $R_f$ : 0.2 (PE:EA, 4:1).  $^1\text{H}$  NMR (400 MHz,  $\text{CDCl}_3$ )  $\delta$  7.79 (d,  $J = 8.3$  Hz, 2H), 7.60 – 7.53 (m, 2H), 7.41 – 7.29 (m, 5H), 3.60 (d,  $J = 14.2$  Hz, 1H), 3.34 (d,  $J = 14.2$  Hz, 1H), 2.68 (d,  $J = 13.6$  Hz, 1H), 2.43 (s, 3H), 2.01 (d,  $J = 13.6$  Hz, 1H), 1.54 (s, 3H), 1.44 (s, 3H), 1.38 (s, 3H).  $^{13}\text{C}$  NMR (101 MHz,  $\text{CDCl}_3$ )  $\delta$  178.48, 144.30, 138.82, 134.24, 129.78, 129.59, 128.11, 128.06, 127.77, 70.67, 66.53, 52.14, 51.02, 28.98, 28.32, 21.57, 21.54. ESI-MS: Calcd for  $\text{C}_{21}\text{H}_{25}\text{NO}_2\text{S}$ :  $[\text{M}+\text{H}^+]$  356.1679, found 356.1677.

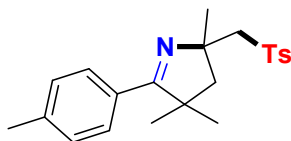

**3ba**: yield: 88%, 65.0 mg; appearance: yellow solid; M.p.: 117–121°C.  $R_f$ : 0.4 (PE:EA, 3:1).  $^1\text{H}$  NMR (400 MHz,  $\text{CDCl}_3$ )  $\delta$  7.79 (d,  $J = 8.2$  Hz, 2H), 7.49 (d,  $J = 8.1$  Hz, 2H), 7.30 (d,  $J = 8.1$  Hz, 2H), 7.13 (d,  $J = 8.0$  Hz, 2H), 3.60 (d,  $J = 14.2$  Hz, 1H), 3.32 (d,  $J = 14.2$  Hz, 1H), 2.65 (d,  $J = 13.6$  Hz, 1H), 2.42 (s, 3H), 2.35 (s, 3H), 1.99 (d,  $J = 13.6$  Hz, 1H), 1.53 (s, 3H), 1.43 (s, 3H), 1.38 (s, 3H).  $^{13}\text{C}$  NMR (101 MHz,  $\text{CDCl}_3$ )  $\delta$  178.02, 144.21, 139.72, 138.70, 131.12, 129.71, 128.75, 128.02, 127.70, 70.37, 66.50, 51.89, 51.16, 28.99, 28.87, 28.36, 21.51, 21.24. ESI-MS: Calcd for  $\text{C}_{22}\text{H}_{27}\text{NO}_2\text{S}$ :  $[\text{M}+\text{H}^+]$  370.1835, found 370.1834.

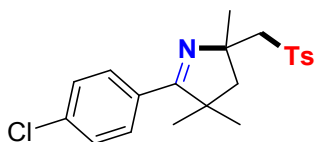

**3ca**: yield: 50%, 38.9 mg; appearance: yellow solid; M.p.: 130–135°C.  $R_f$ : 0.5 (PE:EA, 3:1).  $^1\text{H}$  NMR (400 MHz,  $\text{CDCl}_3$ )  $\delta$  7.78 (d,  $J = 8.1$  Hz, 2H), 7.53 (d,  $J = 8.5$  Hz, 2H), 7.30 (d,  $J = 7.8$  Hz, 4H), 3.56 (d,  $J = 14.2$  Hz, 1H), 3.34 (d,  $J = 14.2$  Hz, 1H), 2.68 (d,  $J = 13.6$  Hz, 1H), 2.42 (s, 3H), 1.99 (d,  $J = 13.6$  Hz,

1H), 1.51 (s, 3H), 1.42 (s, 3H), 1.37 (s, 3H). <sup>13</sup>C NMR (101 MHz, CDCl<sub>3</sub>) δ 177.13, 144.30, 138.73, 135.80, 132.52, 129.75, 129.50, 128.33, 127.72, 70.69, 66.32, 51.95, 51.00, 29.03, 28.95, 28.19, 21.55. ESI-MS: Calcd for C<sub>21</sub>H<sub>24</sub>ClNO<sub>2</sub>S: [M+H<sup>+</sup>] 390.1289, found 390.1288.

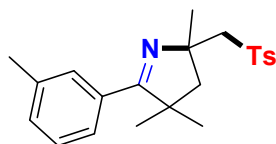

**3da**: yield: 45%, 33.2 mg; appearance: yellow oil; R<sub>f</sub>: 0.5 (PE:EA, 3:1). <sup>1</sup>H NMR (400 MHz, CDCl<sub>3</sub>) δ 7.79 (d, *J* = 8.2 Hz, 2H), 7.40 – 7.35 (m, 2H), 7.31 (d, *J* = 8.1 Hz, 2H), 7.20 (dd, *J* = 11.1, 7.5 Hz, 2H), 3.61 (d, *J* = 14.2 Hz, 1H), 3.33 (d, *J* = 14.2 Hz, 1H), 2.67 (d, *J* = 13.6 Hz, 1H), 2.42 (s, 3H), 2.34 (s, 3H), 2.00 (d, *J* = 13.6 Hz, 1H), 1.54 (s, 3H), 1.43 (s, 3H), 1.38 (s, 3H). <sup>13</sup>C NMR (101 MHz, CDCl<sub>3</sub>) δ 178.60, 144.22, 138.74, 137.77, 134.12, 130.33, 129.71, 128.76, 127.88, 127.70, 124.87, 70.53, 66.47, 52.09, 50.93, 28.97, 28.90, 28.32, 21.53, 21.36. ESI-MS: Calcd for C<sub>22</sub>H<sub>27</sub>NO<sub>2</sub>S: [M+H<sup>+</sup>] 370.1835, found 370.1836.

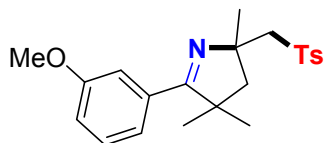

**3ea**: yield: 57%, 43.9 mg; appearance: yellow oil; R<sub>f</sub>: 0.1 (PE:EA, 3:1). <sup>1</sup>H NMR (400 MHz, CDCl<sub>3</sub>) δ 7.80 (d, *J* = 8.2 Hz, 2H), 7.32 (d, *J* = 8.1 Hz, 2H), 7.27 (d, *J* = 5.3 Hz, 1H), 7.15 (dd, *J* = 8.0, 5.0 Hz, 2H), 6.93 (dd, *J* = 8.1, 2.3 Hz, 1H), 3.81 (s, 3H), 3.61 (d, *J* = 14.2 Hz, 1H), 3.33 (d, *J* = 14.2 Hz, 1H), 2.67 (d, *J* = 13.6 Hz, 1H), 2.43 (s, 3H), 2.01 (d, *J* = 13.6 Hz, 1H), 1.54 (s, 3H), 1.44 (s, 3H), 1.38 (s, 3H). <sup>13</sup>C NMR (101 MHz, CDCl<sub>3</sub>) δ 178.25, 159.28, 144.29, 138.71, 135.52, 129.74, 129.06, 127.70, 120.35, 115.20, 113.73, 70.60, 66.46, 55.21, 52.12, 50.96, 28.95, 28.90, 28.32, 21.53. ESI-MS: Calcd for C<sub>22</sub>H<sub>27</sub>NO<sub>3</sub>S: [M+H<sup>+</sup>] 386.1784, found 386.1788.

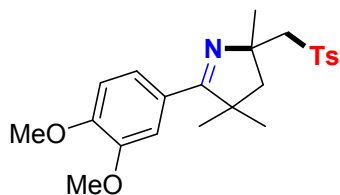

**3fa**: yield: 85%, 70.6 mg; appearance: yellow oil; R<sub>f</sub>: 0.4 (PE:EA, 1:1). <sup>1</sup>H NMR (400 MHz, CDCl<sub>3</sub>) δ 7.69 (d, *J* = 8.2 Hz, 2H), 7.20 (dd, *J* = 5.0, 3.0 Hz, 3H), 7.16 (dd, *J* = 8.4, 1.9 Hz, 1H), 6.72 (d, *J* = 8.4 Hz, 1H), 3.79 (s, 3H),

3.78 (s, 3H), 3.51 (d,  $J = 14.2$  Hz, 1H), 3.22 (d,  $J = 14.2$  Hz, 1H), 2.57 (d,  $J = 13.6$  Hz, 1H), 2.31 (s, 3H), 1.90 (d,  $J = 13.6$  Hz, 1H), 1.44 (s, 3H), 1.37 (s, 3H), 1.33 (s, 3H).  $^{13}\text{C}$  NMR (101 MHz,  $\text{CDCl}_3$ )  $\delta$  176.94, 150.44, 148.51, 144.08, 138.68, 129.58, 127.57, 126.52, 120.97, 111.63, 110.11, 70.03, 66.46, 55.77, 55.73, 51.63, 51.41, 29.12, 28.85, 28.49, 21.38. ESI-MS: Calcd for  $\text{C}_{23}\text{H}_{29}\text{NO}_4\text{S}$ :  $[\text{M}+\text{H}^+]$  416.1890, found 416.1891.

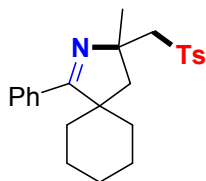

**3ga**: yield: 73%, 57.7 mg; appearance: yellow oil;  $R_f$ : 0.3 (PE:EA, 3:1).  $^1\text{H}$  NMR (400 MHz,  $\text{CDCl}_3$ )  $\delta$  7.80 (d,  $J = 8.2$  Hz, 2H), 7.45 – 7.42 (m, 2H), 7.32 (dd,  $J = 11.9, 7.8$  Hz, 5H), 3.60 (d,  $J = 14.2$  Hz, 1H), 3.32 (d,  $J = 14.2$  Hz, 1H), 2.63 (d,  $J = 13.8$  Hz, 1H), 2.42 (s, 3H), 2.07 (d,  $J = 13.8$  Hz, 1H), 1.70 (m, 6H), 1.58 (d,  $J = 8.7$  Hz, 2H), 1.53 (s, 3H), 1.43 – 1.35 (m, 2H).  $^{13}\text{C}$  NMR (101 MHz,  $\text{CDCl}_3$ )  $\delta$  179.48, 144.27, 138.81, 135.26, 129.74, 128.98, 128.03, 127.93, 127.71, 71.42, 66.64, 58.25, 44.26, 35.43, 35.25, 29.70, 25.31, 23.08, 22.87, 21.53. ESI-MS: Calcd for  $\text{C}_{24}\text{H}_{29}\text{NO}_2\text{S}$ :  $[\text{M}+\text{H}^+]$  396.1992, found 396.1998.

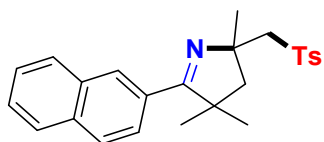

**3ha**: yield: 71%, 57.5 mg; appearance: brown oil;  $R_f$ : 0.3 (PE:EA, 3:1).  $^1\text{H}$  NMR (400 MHz,  $\text{CDCl}_3$ )  $\delta$  8.10 (s, 1H), 7.85 – 7.78 (m, 5H), 7.71 (d,  $J = 8.6$  Hz, 1H), 7.52 – 7.48 (m, 2H), 7.31 (d,  $J = 8.1$  Hz, 2H), 3.65 (d,  $J = 14.2$  Hz, 1H), 3.42 (d,  $J = 14.2$  Hz, 1H), 2.75 (d,  $J = 13.6$  Hz, 1H), 2.41 (s, 3H), 2.06 (d,  $J = 13.6$  Hz, 1H), 1.59 (s, 3H), 1.54 (s, 3H), 1.49 (s, 3H).  $^{13}\text{C}$  NMR (101 MHz,  $\text{CDCl}_3$ )  $\delta$  144.30, 138.74, 133.82, 132.73, 129.78, 128.65, 127.93, 127.78, 127.76, 127.58, 126.95, 126.30, 125.64, 70.67, 66.43, 52.16, 51.20, 29.22, 29.05, 28.52, 21.54. ESI-MS: Calcd for  $\text{C}_{25}\text{H}_{27}\text{NO}_2\text{S}$ :  $[\text{M}+\text{H}^+]$  406.1835, found 406.1836.

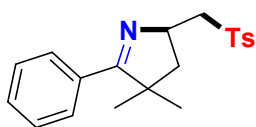

**3ia**: yield: 75%, 51.2 mg; appearance: yellow solid; M.p.: 132–138°C.  $R_f$ : 0.3 (PE:EA, 3:1).  $^1\text{H}$  NMR (400 MHz,  $\text{CDCl}_3$ )  $\delta$  7.85 (d,  $J = 8.3$  Hz, 2H),

7.59 (dd,  $J = 8.2, 1.4$  Hz, 2H), 7.39 – 7.31 (m, 5H), 4.43 – 4.33 (m, 1H), 3.87 (dd,  $J = 14.0, 4.0$  Hz, 1H), 3.17 (dd,  $J = 14.0, 9.8$  Hz, 1H), 2.45 (s, 3H), 2.34 (dd,  $J = 13.0, 6.8$  Hz, 1H), 1.82 (dd,  $J = 13.0, 8.8$  Hz, 1H), 1.35 (s, 3H), 1.34 (s, 3H).  $^{13}\text{C}$  NMR (101 MHz,  $\text{CDCl}_3$ )  $\delta$  180.90, 144.59, 137.12, 133.92, 129.81, 128.16, 128.07, 127.84, 62.65, 62.19, 51.09, 48.27, 27.16, 25.68, 21.57. ESI-MS: Calcd for  $\text{C}_{20}\text{H}_{23}\text{NO}_2\text{S}$ :  $[\text{M}+\text{H}^+]$  342.1522, found 342.1521.

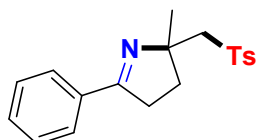

**3ja**: yield: 22%, 14.4 mg; appearance: yellow oil;  $R_f$ : 0.5 (PE:EA, 2:1).  $^1\text{H}$  NMR (400 MHz,  $\text{CDCl}_3$ )  $\delta$  7.72 (d,  $J = 7.9$  Hz, 2H), 7.64 (d,  $J = 7.7$  Hz, 2H), 7.38 (dd,  $J = 18.7, 7.2$  Hz, 3H), 7.23 (d,  $J = 7.9$  Hz, 2H), 3.58 (d,  $J = 14.4$  Hz, 1H), 3.49 (d,  $J = 14.4$  Hz, 1H), 3.13 – 3.04 (m, 2H), 2.68 – 2.60 (m, 1H), 2.37 (s, 3H), 2.01 – 1.95 (m, 1H), 1.45 (s, 3H).  $^{13}\text{C}$  NMR (101 MHz,  $\text{CDCl}_3$ )  $\delta$  171.89, 144.17, 138.39, 133.88, 130.68, 129.64, 128.25, 127.84, 127.82, 74.55, 65.31, 35.63, 33.08, 27.89, 21.52. ESI-MS: Calcd for  $\text{C}_{19}\text{H}_{21}\text{NO}_2\text{S}$ :  $[\text{M}+\text{H}^+]$  328.1366, found 328.1368.

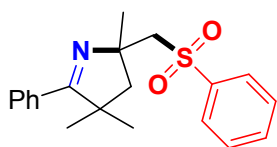

**3ab**: yield: 73%, 49.8 mg; appearance: yellow oil;  $R_f$ : 0.5 (PE:EA, 3:1).  $^1\text{H}$  NMR (400 MHz,  $\text{CDCl}_3$ )  $\delta$  7.92 (d,  $J = 7.8$  Hz, 2H), 7.61 – 7.56 (m, 3H), 7.51 (t,  $J = 7.6$  Hz, 2H), 7.38 – 7.30 (m, 3H), 3.62 (d,  $J = 14.2$  Hz, 1H), 3.36 (d,  $J = 14.2$  Hz, 1H), 2.66 (d,  $J = 13.6$  Hz, 1H), 2.01 (d,  $J = 13.6$  Hz, 1H), 1.55 (s, 3H), 1.43 (s, 3H), 1.38 (s, 3H).  $^{13}\text{C}$  NMR (101 MHz,  $\text{CDCl}_3$ )  $\delta$  178.43, 141.63, 134.11, 133.29, 129.57, 129.11, 128.06, 128.00, 127.65, 70.59, 66.41, 52.07, 51.06, 29.59, 28.91, 28.26. ESI-MS: Calcd for  $\text{C}_{20}\text{H}_{23}\text{NO}_2\text{S}$ :  $[\text{M}+\text{H}^+]$  342.1522, found 342.1523.

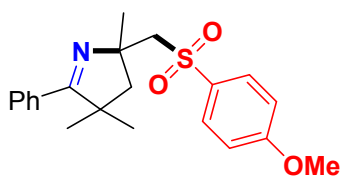

**3ac**: yield: 63%, 46.9 mg; appearance: yellow oil;  $R_f$ : 0.2 (PE:EA, 5:1).  $^1\text{H}$  NMR (400 MHz,  $\text{CDCl}_3$ )  $\delta$  7.85 – 7.80 (m, 2H), 7.57 (dd,  $J = 8.1, 1.4$  Hz, 2H), 7.38 – 7.31 (m, 3H), 6.95 (d,  $J = 8.9$  Hz, 2H), 3.84 (s, 3H), 3.58 (d,  $J = 14.2$  Hz, 1H), 3.33 (d,  $J = 14.2$  Hz, 1H), 2.66 (d,  $J = 13.6$  Hz, 1H), 1.98 (d,  $J = 13.6$

Hz, 1H), 1.53 (s, 3H), 1.42 (s, 3H), 1.37 (s, 3H).  $^{13}\text{C}$  NMR (101 MHz,  $\text{CDCl}_3$ )  $\delta$  178.32, 163.41, 134.13, 133.20, 129.86, 129.53, 128.04, 127.98, 114.25, 70.55, 66.62, 55.58, 55.54, 52.01, 50.89, 28.89, 28.25. ESI-MS: Calcd for  $\text{C}_{21}\text{H}_{25}\text{NO}_3\text{S}$ :  $[\text{M}+\text{H}^+]$  372.1628, found 372.1627.

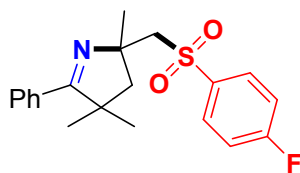

**3ad**: yield: 66%, 47.4 mg; appearance: yellow oil;  $R_f$ : 0.3 (PE:EA, 3:1).  $^1\text{H}$  NMR (400 MHz,  $\text{CDCl}_3$ )  $\delta$  7.94 – 7.89 (m, 2H), 7.56 (dd,  $J$  = 8.1, 1.4 Hz, 2H), 7.38 – 7.32 (m, 3H), 7.14 (t,  $J$  = 8.6 Hz, 2H), 3.61 (d,  $J$  = 14.3 Hz, 1H), 3.44 (d,  $J$  = 14.3 Hz, 1H), 2.68 (d,  $J$  = 13.6 Hz, 1H), 2.00 (d,  $J$  = 13.6 Hz, 1H), 1.54 (s, 3H), 1.42 (s, 3H), 1.39 (s, 3H).  $^{13}\text{C}$  NMR (101 MHz,  $\text{CDCl}_3$ )  $\delta$  178.90, 165.44 (d,  $J$  = 255.8 Hz), 137.52 (d,  $J$  = 3.3 Hz), 133.72, 130.57 (d,  $J$  = 9.7 Hz), 129.68, 127.98 (d,  $J$  = 12.6 Hz), 116.38, 116.15, 70.51, 66.21, 51.95, 50.78, 28.96, 28.85, 28.08.  $^{19}\text{F}$  NMR (376 MHz,  $\text{CDCl}_3$ )  $\delta$  -104.06. ESI-MS: Calcd for  $\text{C}_{20}\text{H}_{22}\text{FNO}_2\text{S}$ :  $[\text{M}+\text{H}^+]$  360.1428, found 360.1429.

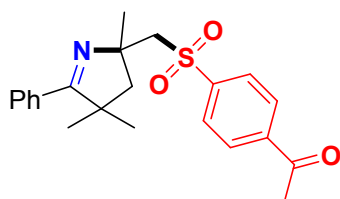

**3ae**: yield: 36%, 27.6 mg; appearance: yellow oil;  $R_f$ : 0.2 (PE:EA, 3:1).  $^1\text{H}$  NMR (400 MHz,  $\text{CDCl}_3$ )  $\delta$  8.01 (q,  $J$  = 8.5 Hz, 4H), 7.54 – 7.50 (m, 2H), 7.38 – 7.28 (m, 3H), 3.60 (d,  $J$  = 14.4 Hz, 1H), 3.45 (d,  $J$  = 14.4 Hz, 1H), 2.65 (d,  $J$  = 13.6 Hz, 1H), 2.62 (s, 3H), 2.01 (d,  $J$  = 13.6 Hz, 1H), 1.53 (s, 3H), 1.43 (s, 3H), 1.41 (s, 3H).  $^{13}\text{C}$  NMR (101 MHz,  $\text{CDCl}_3$ )  $\delta$  196.61, 178.51, 145.25, 140.47, 133.89, 129.74, 128.85, 128.22, 128.09, 128.04, 70.52, 66.31, 52.05, 51.22, 29.18, 28.99, 28.27, 26.83. ESI-MS: Calcd for  $\text{C}_{22}\text{H}_{25}\text{NO}_3\text{S}$ :  $[\text{M}+\text{H}^+]$  384.1628, found 384.1630.

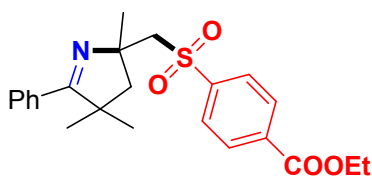

**3af**: yield: 52%, 43.0 mg; appearance: yellow oil;  $R_f$ : 0.3 (PE:EA, 3:1).  $^1\text{H}$  NMR (400 MHz,  $\text{CDCl}_3$ )  $\delta$  8.15 (d,  $J$  = 8.2 Hz, 2H), 7.97 (d,  $J$  =

8.2 Hz, 2H), 7.53 (d,  $J = 7.7$  Hz, 2H), 7.37 – 7.29 (m, 3H), 4.43 (d,  $J = 7.1$  Hz, 1H), 4.39 (d,  $J = 7.1$  Hz, 1H), 3.61 (d,  $J = 14.3$  Hz, 1H), 3.42 (d,  $J = 14.3$  Hz, 1H), 2.64 (d,  $J = 13.6$  Hz, 1H), 2.01 (d,  $J = 13.6$  Hz, 1H), 1.53 (s, 3H), 1.43 (s, 3H), 1.40 (d,  $J = 5.3$  Hz, 6H).  $^{13}\text{C}$  NMR (101 MHz,  $\text{CDCl}_3$ )  $\delta$  178.47, 164.97, 145.19, 134.80, 133.88, 130.23, 129.69, 128.08, 128.02, 127.82, 70.52, 66.34, 61.65, 52.04, 51.21, 29.63, 29.08, 28.26, 14.19. ESI-MS: Calcd for  $\text{C}_{23}\text{H}_{27}\text{NO}_4\text{S}$ :  $[\text{M}+\text{H}^+]$  414.1734, found 414.1736.

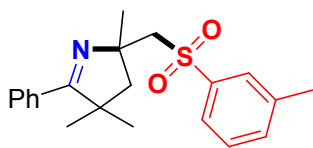

**3ag**: yield: 57%, 40.5 mg; appearance: yellow oil;  $R_f$ : 0.3 (PE:EA, 3:1).  $^1\text{H}$  NMR (400 MHz,  $\text{CDCl}_3$ )  $\delta$  7.71 (s, 2H), 7.60 – 7.55 (m, 2H), 7.41 – 7.32 (m, 5H), 3.61 (d,  $J = 14.2$  Hz, 1H), 3.36 (d,  $J = 14.2$  Hz, 1H), 2.69 (d,  $J = 13.6$  Hz, 1H), 2.37 (s, 3H), 2.01 (d,  $J = 13.6$  Hz, 1H), 1.54 (s, 3H), 1.44 (s, 3H), 1.39 (s, 3H).  $^{13}\text{C}$  NMR (101 MHz,  $\text{CDCl}_3$ )  $\delta$  178.37, 141.51, 139.36, 134.16, 134.06, 129.56, 128.99, 128.07, 128.01, 124.75, 70.61, 66.36, 52.09, 50.99, 29.01, 28.96, 28.24, 21.20. ESI-MS: Calcd for  $\text{C}_{21}\text{H}_{25}\text{NO}_2\text{S}$ :  $[\text{M}+\text{H}^+]$  356.1679, found 356.1680.

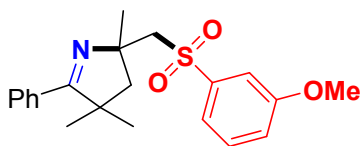

**3ah**: yield: 64%, 47.5 mg; appearance: yellow oil;  $R_f$ : 0.3 (PE:EA, 3:1).  $^1\text{H}$  NMR (400 MHz,  $\text{CDCl}_3$ )  $\delta$  7.58 (dd,  $J = 8.1, 1.5$  Hz, 2H), 7.49 (dd,  $J = 6.5, 1.2$  Hz, 1H), 7.43 (d,  $J = 8.0$  Hz, 1H), 7.40 – 7.33 (m, 4H), 7.13 – 7.11 (m, 1H), 3.80 (s, 3H), 3.62 (d,  $J = 14.2$  Hz, 1H), 3.37 (d,  $J = 14.2$  Hz, 1H), 2.68 (d,  $J = 13.5$  Hz, 1H), 2.02 (d,  $J = 13.5$  Hz, 1H), 1.55 (s, 3H), 1.44 (s, 3H), 1.39 (s, 3H).  $^{13}\text{C}$  NMR (101 MHz,  $\text{CDCl}_3$ )  $\delta$  178.47, 159.96, 142.81, 134.16, 130.24, 129.59, 128.11, 128.02, 119.91, 119.81, 112.12, 70.64, 66.34, 55.60, 52.13, 50.98, 29.01, 28.95, 28.28. ESI-MS: Calcd for  $\text{C}_{21}\text{H}_{25}\text{NO}_3\text{S}$ :  $[\text{M}+\text{H}^+]$  372.1628, found 372.1629.

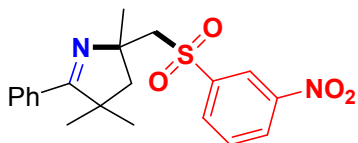

**3ai**: yield: 36%, 27.8 mg; appearance: yellow oil;  $R_f$ : 0.2 (PE:EA, 3:1).  $^1\text{H}$  NMR (400 MHz,  $\text{CDCl}_3$ )  $\delta$  8.71 (t,  $J = 1.9$  Hz, 1H), 8.38 – 8.39 (m, 1H), 8.22 – 8.17 (m, 1H), 7.66 (t,  $J = 8.0$  Hz, 1H), 7.49 (dd,  $J = 8.3, 1.2$  Hz, 2H), 7.38

(t,  $J = 7.3$  Hz, 1H), 7.30 (t,  $J = 7.4$  Hz, 2H), 3.61 (d,  $J = 14.5$  Hz, 1H), 3.55 (d,  $J = 14.5$  Hz, 1H), 2.64 (d,  $J = 13.5$  Hz, 1H), 2.00 (d,  $J = 13.5$  Hz, 1H), 1.52 (s, 3H), 1.45 (s, 3H), 1.41 (s, 3H).  $^{13}\text{C}$  NMR (101 MHz,  $\text{CDCl}_3$ )  $\delta$  178.56, 148.17, 143.69, 133.60, 133.51, 130.33, 129.87, 128.11, 127.93, 127.58, 123.41, 70.42, 66.40, 51.98, 51.36, 29.37, 28.99, 28.23. ESI-MS: Calcd for  $\text{C}_{20}\text{H}_{22}\text{N}_2\text{O}_4\text{S}$ :  $[\text{M}+\text{H}^+]$  387.1373, found 387.1374.

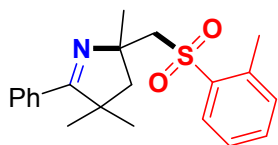

**3aj**: yield: 47%, 33.4 mg; appearance: yellow oil;  $R_f$ : 0.4 (PE:EA, 3:1).  $^1\text{H}$  NMR (400 MHz,  $\text{CDCl}_3$ )  $\delta$  7.71 (s, 2H), 7.60 – 7.55 (m, 2H), 7.41 – 7.33 (m, 5H), 3.61 (d,  $J = 14.2$  Hz, 1H), 3.36 (d,  $J = 14.2$  Hz, 1H), 2.70 (d,  $J = 13.6$  Hz, 1H), 2.38 (s, 3H), 2.02 (d,  $J = 13.6$  Hz, 1H), 1.55 (s, 3H), 1.44 (s, 3H), 1.39 (s, 3H).  $^{13}\text{C}$  NMR (101 MHz,  $\text{CDCl}_3$ )  $\delta$  178.51, 141.51, 139.42, 134.18, 134.11, 129.61, 129.03, 128.12, 128.04, 124.79, 70.65, 66.36, 52.14, 50.98, 29.04, 28.99, 28.27, 21.25. ESI-MS: Calcd for  $\text{C}_{21}\text{H}_{25}\text{NO}_2\text{S}$ :  $[\text{M}+\text{H}^+]$  356.1679, found 356.1680.

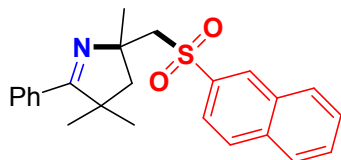

**3ak**: yield: 42%, 32.9 mg; appearance: yellow oil;  $R_f$ : 0.3 (PE:EA, 3:1).  $^1\text{H}$  NMR (400 MHz,  $\text{CDCl}_3$ )  $\delta$  8.48 (d,  $J = 1.5$  Hz, 1H), 7.97 – 7.88 (m, 4H), 7.67 – 7.57 (m, 2H), 7.52 – 7.45 (m, 2H), 7.36 – 7.31 (m, 1H), 7.27 – 7.21 (m, 2H), 3.71 (d,  $J = 14.3$  Hz, 1H), 3.52 (d,  $J = 14.3$  Hz, 1H), 2.75 (d,  $J = 13.6$  Hz, 1H), 2.04 (d,  $J = 13.6$  Hz, 1H), 1.57 (s, 3H), 1.44 (s, 3H), 1.40 (s, 3H).  $^{13}\text{C}$  NMR (101 MHz,  $\text{CDCl}_3$ )  $\delta$  178.72, 138.50, 135.15, 133.96, 132.16, 129.58, 129.45, 129.41, 129.37, 129.04, 128.04, 127.99, 127.88, 127.51, 122.60, 70.69, 66.28, 52.06, 51.03, 29.09, 28.98, 28.23. ESI-MS: Calcd for  $\text{C}_{24}\text{H}_{25}\text{NO}_2\text{S}$ :  $[\text{M}+\text{H}^+]$  392.1679, found 392.1673.

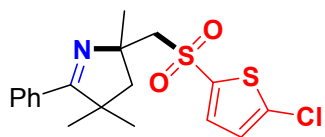

**3al**: yield: 60%, 45.7 mg; appearance: brown oil;  $R_f$ : 0.2 (PE:EA, 3:1).  $^1\text{H}$  NMR (400 MHz,  $\text{CDCl}_3$ )  $\delta$  7.62 (dd,  $J = 8.0, 1.6$  Hz, 2H), 7.46 (d,  $J$

= 4.0 Hz, 1H), 7.40 – 7.34 (m, 3H), 6.92 (d,  $J$  = 4.0 Hz, 1H), 3.68 (d,  $J$  = 14.3 Hz, 1H), 3.51 (d,  $J$  = 14.3 Hz, 1H), 2.63 (d,  $J$  = 13.6 Hz, 1H), 2.01 (d,  $J$  = 13.6 Hz, 1H), 1.56 (s, 3H), 1.45 (s, 3H), 1.40 (s, 3H).  $^{13}\text{C}$  NMR (101 MHz,  $\text{CDCl}_3$ )  $\delta$  178.79, 140.86, 139.15, 134.01, 133.12, 129.75, 128.19, 128.06, 127.09, 70.66, 68.03, 52.14, 51.03, 29.67, 29.03, 28.31. ESI-MS: Calcd for  $\text{C}_{18}\text{H}_{20}\text{ClNO}_2\text{S}_2$ :  $[\text{M}+\text{H}^+]$  382.0697, found 382.0699.

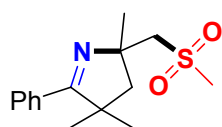

**3am**: yield: 45%, 25.1 mg; appearance: yellow oil;  $R_f$ : 0.3 (PE:EA, 5:1).  $^1\text{H}$  NMR (400 MHz,  $\text{CDCl}_3$ )  $\delta$  7.68 (dd,  $J$  = 7.8, 1.7 Hz, 2H), 7.45 – 7.32 (m, 3H), 3.40 (d,  $J$  = 14.7 Hz, 1H), 3.31 (d,  $J$  = 14.7 Hz, 1H), 2.98 (s, 3H), 2.57 (d,  $J$  = 13.4 Hz, 1H), 1.94 (d,  $J$  = 13.4 Hz, 1H), 1.52 (s, 3H), 1.43 (s, 3H), 1.39 (s, 3H).  $^{13}\text{C}$  NMR (101 MHz,  $\text{CDCl}_3$ )  $\delta$  179.24, 134.11, 129.65, 128.24, 127.86, 69.93, 64.95, 51.88, 51.13, 44.08, 29.41, 28.98, 27.98. ESI-MS: Calcd for  $\text{C}_{15}\text{H}_{21}\text{NO}_2\text{S}$ :  $[\text{M}+\text{H}^+]$  280.1366, found 280.1367.

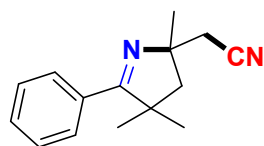

**4a**: yield: 75%, 33.9 mg; appearance: yellow oil;  $R_f$ : 0.1 (PE:EA, 10:1).  $^1\text{H}$  NMR (400 MHz,  $\text{CDCl}_3$ )  $\delta$  7.68 (dd,  $J$  = 7.8, 1.7 Hz, 2H), 7.40 (t,  $J$  = 7.4 Hz, 3H), 2.74 (d,  $J$  = 16.6 Hz, 1H), 2.69 (d,  $J$  = 16.6 Hz, 1H), 2.14 (d,  $J$  = 13.5 Hz, 1H), 2.00 (d,  $J$  = 13.5 Hz, 1H), 1.51 (s, 3H), 1.46 (s, 3H), 1.39 (s, 3H).  $^{13}\text{C}$  NMR (101 MHz,  $\text{CDCl}_3$ )  $\delta$  180.04, 133.99, 129.75, 128.23, 128.03, 117.99, 70.00, 52.30, 51.30, 32.01, 28.92, 28.56, 28.20. ESI-MS: Calcd for  $\text{C}_{15}\text{H}_{18}\text{N}_2$ :  $[\text{M}+\text{H}^+]$  227.1543, found 227.1544.

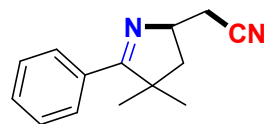

**4b**: yield: 70%, 29.7 mg; appearance: brown oil;  $R_f$ : 0.1 (PE:EA, 5:1).  $^1\text{H}$  NMR (400 MHz,  $\text{CDCl}_3$ )  $\delta$  7.70 (dd,  $J$  = 8.0, 1.6 Hz, 2H), 7.44 – 7.39 (m, 3H), 4.39 – 4.24 (m, 1H), 2.86 (dd,  $J$  = 16.7, 5.1 Hz, 1H), 2.80 (dd,  $J$  = 16.7, 6.8 Hz, 1H), 2.24 (dd,  $J$  = 12.7, 6.8 Hz, 1H), 1.78 (dd,  $J$  = 12.7, 9.0 Hz, 1H), 1.40 (s, 6H).  $^{13}\text{C}$  NMR (101 MHz,  $\text{CDCl}_3$ )  $\delta$  182.09, 133.84, 129.98, 128.28, 127.93, 117.75, 63.62, 51.44, 46.87, 26.99, 25.97, 24.56. ESI-MS: Calcd for  $\text{C}_{14}\text{H}_{16}\text{N}_2$ :  $[\text{M}+\text{H}^+]$  213.1386, found 213.1387.

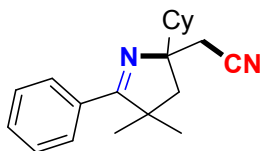

**4c:** yield: 46%, 27.1 mg; appearance: yellow oil;  $R_f$ : 0.2 (PE:EA, 15:1).  $^1\text{H}$  NMR (400 MHz,  $\text{CDCl}_3$ )  $\delta$  7.66 (dd,  $J = 7.5, 2.0$  Hz, 2H), 7.38 (d,  $J = 6.8$  Hz, 3H), 2.72 (d,  $J = 16.4$  Hz, 1H), 2.67 (d,  $J = 16.4$  Hz, 1H), 2.09 (d,  $J = 14.0$  Hz, 1H), 1.87 (d,  $J = 14.0$  Hz, 1H), 1.83 – 1.68 (m, 6H), 1.46 (s, 3H), 1.37 (s, 3H), 1.27 – 1.01 (m, 5H).  $^{13}\text{C}$  NMR (101 MHz,  $\text{CDCl}_3$ )  $\delta$  179.57, 134.56, 129.43, 128.18, 128.08, 118.64, 76.11, 51.96, 46.82, 46.27, 29.66, 28.98, 28.64, 28.27, 28.04, 27.65, 26.46, 26.35. ESI-MS: Calcd for  $\text{C}_{20}\text{H}_{26}\text{N}_2$ :  $[\text{M}+\text{H}^+]$  295.2169, found 295.2172.

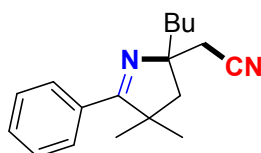

**4d:** yield: 65%, 34.9 mg; appearance: yellow oil;  $R_f$ : 0.2 (PE:EA, 10:1).  $^1\text{H}$  NMR (400 MHz,  $\text{CDCl}_3$ )  $\delta$  7.71 – 7.62 (m, 2H), 7.42 – 7.35 (m, 3H), 2.67 (s, 2H), 2.05 (d,  $J = 13.9$  Hz, 1H), 2.01 (d,  $J = 13.9$  Hz, 1H), 1.81 – 1.69 (m, 2H), 1.43 (s, 3H), 1.41 (s, 3H), 1.37 – 1.25 (m, 4H), 0.92 (t,  $J = 7.0$  Hz, 3H).  $^{13}\text{C}$  NMR (101 MHz,  $\text{CDCl}_3$ )  $\delta$  179.89, 134.33, 129.58, 128.21, 128.04, 118.22, 73.09, 52.12, 48.84, 40.94, 30.42, 28.62, 28.58, 26.57, 22.99, 13.92. ESI-MS: Calcd for  $\text{C}_{18}\text{H}_{24}\text{N}_2$ :  $[\text{M}+\text{H}^+]$  269.2012, found 269.2015.

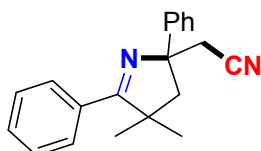

**4e:** yield: 39%, 22.5 mg; appearance: yellow oil;  $R_f$ : 0.2 (PE:EA, 10:1).  $^1\text{H}$  NMR (400 MHz,  $\text{CDCl}_3$ )  $\delta$  7.81 (dd,  $J = 7.7, 1.8$  Hz, 2H), 7.49 (d,  $J = 7.4$  Hz, 2H), 7.46 – 7.42 (m, 3H), 7.35 (d,  $J = 7.9$  Hz, 2H), 7.30 – 7.27 (m, 1H), 3.01 (d,  $J = 16.5$  Hz, 1H), 2.94 (d,  $J = 16.5$  Hz, 1H), 2.53 (d,  $J = 13.2$  Hz, 1H), 2.47 (d,  $J = 13.2$  Hz, 1H), 1.45 (s, 3H), 1.15 (s, 3H).  $^{13}\text{C}$  NMR (101 MHz,  $\text{CDCl}_3$ )  $\delta$  180.82, 145.73, 134.11, 129.96, 128.60, 128.32, 128.23, 127.37, 125.52, 117.71, 74.23, 52.47, 52.08, 34.11, 27.44, 27.26. ESI-MS: Calcd for  $\text{C}_{20}\text{H}_{20}\text{N}_2$ :  $[\text{M}+\text{H}^+]$  289.1699, found 289.1700.

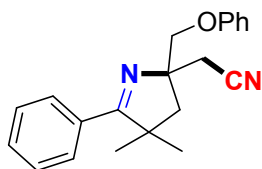

**4f:** yield: 60%, 38.2 mg; appearance: yellow oil;  $R_f$ : 0.1 (PE:EA, 10:1).  $^1\text{H}$  NMR (400 MHz,  $\text{CDCl}_3$ )  $\delta$  7.68 – 7.58 (m, 2H), 7.32 (dd,  $J$  = 9.2, 6.1 Hz, 3H), 7.20 (dd,  $J$  = 8.4, 7.6 Hz, 2H), 6.92 – 6.80 (m, 3H), 4.03 (d,  $J$  = 9.0 Hz, 1H), 3.86 (d,  $J$  = 9.0 Hz, 1H), 2.84 (d,  $J$  = 16.6 Hz, 1H), 2.79 (d,  $J$  = 16.6 Hz, 1H), 2.25 (d,  $J$  = 13.9 Hz, 1H), 2.02 (d,  $J$  = 13.9 Hz, 1H), 1.40 (s, 3H), 1.38 (s, 3H).  $^{13}\text{C}$  NMR (101 MHz,  $\text{CDCl}_3$ )  $\delta$  182.64, 158.40, 133.91, 129.87, 129.48, 128.21, 128.11, 121.33, 117.61, 114.52, 73.26, 73.11, 52.43, 47.16, 28.77, 28.44, 28.11. ESI-MS: Calcd for  $\text{C}_{21}\text{H}_{22}\text{N}_2\text{O}$ :  $[\text{M}+\text{H}^+]$  319.1805, found 319.1811.

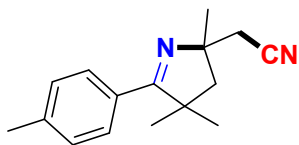

**4g:** yield: 72%, 34.6 mg; appearance: yellow oil;  $R_f$ : 0.1 (PE:EA, 10:1).  $^1\text{H}$  NMR (400 MHz,  $\text{CDCl}_3$ )  $\delta$  7.61 (d,  $J$  = 8.2 Hz, 2H), 7.18 (d,  $J$  = 8.0 Hz, 2H), 2.68 (d,  $J$  = 16.5 Hz, 1H), 2.64 (d,  $J$  = 16.5 Hz, 1H), 2.37 (s, 3H), 2.11 (d,  $J$  = 13.4 Hz, 1H), 1.98 (d,  $J$  = 13.4 Hz, 1H), 1.48 (s, 3H), 1.46 (s, 3H), 1.40 (s, 3H).  $^{13}\text{C}$  NMR (101 MHz,  $\text{CDCl}_3$ )  $\delta$  179.27, 139.91, 131.20, 128.94, 128.08, 118.08, 69.79, 52.21, 51.63, 32.16, 29.05, 28.65, 28.40, 21.30. ESI-MS: Calcd for  $\text{C}_{16}\text{H}_{20}\text{N}_2$ :  $[\text{M}+\text{H}^+]$  241.1699, found 241.1700.

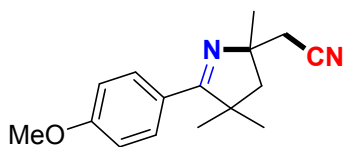

**4h:** yield: 62%, 31.8 mg; appearance: yellow oil;  $R_f$ : 0.2 (PE:EA, 4:1).  $^1\text{H}$  NMR (400 MHz,  $\text{CDCl}_3$ )  $\delta$  7.74 – 7.70 (m, 2H), 6.89 (d,  $J$  = 8.9 Hz, 2H), 3.83 (s, 3H), 2.68 (d,  $J$  = 16.7 Hz, 1H), 2.61 (d,  $J$  = 16.7 Hz, 1H), 2.11 (d,  $J$  = 13.4 Hz, 1H), 1.97 (d,  $J$  = 13.4 Hz, 1H), 1.48 (s, 3H), 1.47 (s, 3H), 1.41 (s, 3H).  $^{13}\text{C}$  NMR (101 MHz,  $\text{CDCl}_3$ )  $\delta$  178.40, 160.96, 129.80, 126.30, 118.10, 113.62, 69.51, 55.29, 51.97, 51.88, 32.18, 29.15, 28.65, 28.50. ESI-MS: Calcd for  $\text{C}_{16}\text{H}_{20}\text{N}_2\text{O}$ :  $[\text{M}+\text{H}^+]$  257.1648, found 257.1650.

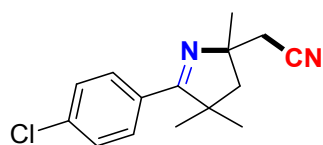

**4i:** yield: 75%, 39.0 mg; appearance: yellow oil;  $R_f$ : 0.2 (PE:EA, 5:1).  $^1\text{H}$  NMR (400 MHz,  $\text{CDCl}_3$ )  $\delta$  7.67 – 7.62 (m, 2H), 7.38 – 7.32 (m, 2H), 2.68 (d,  $J$  = 16.5 Hz, 1H), 2.64 (d,  $J$  = 16.5 Hz, 1H), 2.12 (d,  $J$  = 13.5 Hz, 1H), 1.99 (d,  $J$  = 13.5 Hz, 1H), 1.47 (s, 3H), 1.45 (s, 3H), 1.38 (s, 3H).  $^{13}\text{C}$  NMR (101 MHz,  $\text{CDCl}_3$ )  $\delta$  178.42, 135.99, 132.46, 129.49, 128.50, 117.91, 70.05, 52.25, 51.44, 32.08, 28.92, 28.58, 28.20. ESI-MS: Calcd for  $\text{C}_{15}\text{H}_{17}\text{ClN}_2$ :  $[\text{M}+\text{H}^+]$  261.1153, found 261.1152.

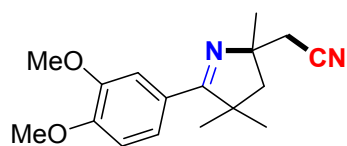

**4j:** yield: 83%, 47.5 mg; appearance: light green oil;  $R_f$ : 0.2 (PE:EA, 3:1).  $^1\text{H}$  NMR (400 MHz,  $\text{CDCl}_3$ )  $\delta$  7.37 (d,  $J$  = 2.0 Hz, 1H), 7.31 (dd,  $J$  = 8.4, 2.0 Hz, 1H), 6.84 (d,  $J$  = 8.4 Hz, 1H), 3.92 (s, 3H), 3.90 (s, 3H), 2.67 (s, 2H), 2.12 (d,  $J$  = 13.4 Hz, 1H), 1.99 (d,  $J$  = 13.4 Hz, 1H), 1.49 (s, 3H), 1.48 (s, 3H), 1.43 (s, 3H).  $^{13}\text{C}$  NMR (101 MHz,  $\text{CDCl}_3$ )  $\delta$  178.45, 150.68, 148.77, 126.50, 121.06, 118.14, 111.64, 110.27, 69.51, 55.95, 55.91, 51.99, 32.18, 29.29, 28.64. ESI-MS: Calcd for  $\text{C}_{17}\text{H}_{22}\text{N}_2\text{O}_2$ :  $[\text{M}+\text{H}^+]$  287.1754, found 287.1753.

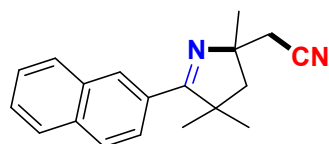

**4k:** yield: 67%, 37.0 mg; appearance: brown oil;  $R_f$ : 0.2 (PE:EA, 5:1).  $^1\text{H}$  NMR (400 MHz,  $\text{CDCl}_3$ )  $\delta$  8.18 (s, 1H), 7.90 – 7.83 (m, 4H), 7.52 – 7.50 (m, 2H), 2.72 (s, 2H), 2.18 (d,  $J$  = 13.4 Hz, 1H), 2.04 (d,  $J$  = 13.4 Hz, 1H), 1.55 (s, 3H), 1.53 (s, 3H), 1.48 (s, 3H).  $^{13}\text{C}$  NMR (101 MHz,  $\text{CDCl}_3$ )  $\delta$  179.30, 133.82, 132.74, 131.43, 128.61, 127.92, 127.83, 127.58, 126.92, 126.32, 125.57, 118.03, 70.01, 52.40, 51.65, 32.13, 29.15, 28.64, 28.47. ESI-MS: Calcd for  $\text{C}_{19}\text{H}_{20}\text{N}_2$ :  $[\text{M}+\text{H}^+]$  277.1699, found 277.1701.

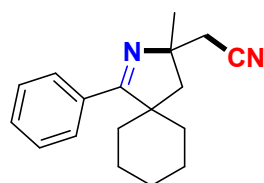

**4l:** yield: 75%, 39.9 mg; appearance: green oil;  $R_f$ : 0.2 (PE:EA,

CC(C)(C)C(C)(C)N=C(c1ccccc1)CSC#N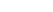

S24

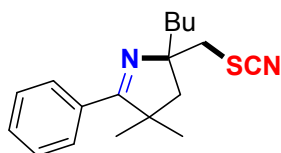

**5d**: yield: 54%, 32.4 mg; appearance: yellow oil;  $R_f$ : 0.3 (PE:EA, 10:1).  $^1\text{H}$  NMR (400 MHz,  $\text{CDCl}_3$ )  $\delta$  7.71 – 7.67 (m, 2H), 7.39 (d,  $J = 7.2$  Hz, 3H), 3.46 (d,  $J = 12.5$  Hz, 1H), 3.22 (d,  $J = 12.5$  Hz, 1H), 2.01 (s, 2H), 1.80 (dd,  $J = 12.3, 3.3$  Hz, 1H), 1.71 (dd,  $J = 12.3, 3.3$  Hz, 1H), 1.45 (s, 3H), 1.41 (s, 3H), 1.37 – 1.29 (m, 4H), 0.93 (t,  $J = 6.8$  Hz, 3H).  $^{13}\text{C}$  NMR (101 MHz,  $\text{CDCl}_3$ )  $\delta$  179.76, 134.06, 129.70, 128.21, 128.06, 113.59, 74.63, 52.12, 48.16, 45.61, 40.04, 28.79, 28.32, 26.54, 23.01, 13.88. ESI-MS: Calcd for  $\text{C}_{18}\text{H}_{24}\text{N}_2\text{S}$ :  $[\text{M}+\text{H}^+]$  301.1733, found 301.1733.

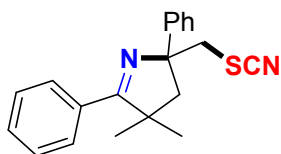

**5e**: yield: 35%, 22.4 mg; appearance: yellow oil;  $R_f$ : 0.3 (PE:EA, 10:1).  $^1\text{H}$  NMR (400 MHz,  $\text{CDCl}_3$ )  $\delta$  7.85 (d,  $J = 6.0$  Hz, 2H), 7.47 – 7.42 (m, 5H), 7.36 (t,  $J = 7.5$  Hz, 2H), 7.29 (d,  $J = 7.2$  Hz, 1H), 3.72 (d,  $J = 12.5$  Hz, 1H), 3.45 (d,  $J = 12.5$  Hz, 1H), 2.50 (d,  $J = 13.2$  Hz, 1H), 2.45 (d,  $J = 13.2$  Hz, 1H), 1.45 (s, 3H), 1.16 (s, 3H).  $^{13}\text{C}$  NMR (101 MHz,  $\text{CDCl}_3$ )  $\delta$  180.86, 145.31, 133.84, 130.13, 128.61, 128.36, 128.31, 127.47, 125.89, 113.54, 76.05, 52.11, 52.06, 48.38, 27.41, 27.35. ESI-MS: Calcd for  $\text{C}_{20}\text{H}_{20}\text{N}_2\text{S}$ :  $[\text{M}+\text{H}^+]$  321.1420, found 321.1421.

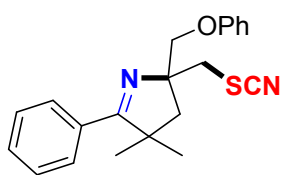

**5f**: yield: 73%, 51.1 mg; appearance: yellow oil;  $R_f$ : 0.2 (PE:EA, 10:1).  $^1\text{H}$  NMR (400 MHz,  $\text{CDCl}_3$ )  $\delta$  7.80 – 7.75 (m, 2H), 7.45 – 7.40 (m, 3H), 7.33 – 7.29 (m, 2H), 7.02 – 6.92 (m, 3H), 4.25 (d,  $J = 9.1$  Hz, 1H), 3.94 (d,  $J = 9.1$  Hz, 1H), 3.65 (d,  $J = 12.9$  Hz, 1H), 3.44 (d,  $J = 12.9$  Hz, 1H), 2.35 (d,  $J = 14.0$  Hz, 1H), 2.14 (d,  $J = 14.0$  Hz, 1H), 1.54 (s, 3H), 1.48 (s, 3H).  $^{13}\text{C}$  NMR (101 MHz,  $\text{CDCl}_3$ )  $\delta$  182.61, 158.37, 133.66, 130.14, 129.54, 128.33, 128.24, 121.38, 114.51, 113.31, 74.91, 72.48, 52.41, 47.12, 43.21, 29.07, 28.37. ESI-MS: Calcd for  $\text{C}_{21}\text{H}_{22}\text{N}_2\text{OS}$ :  $[\text{M}+\text{H}^+]$  351.1526, found 351.1527.

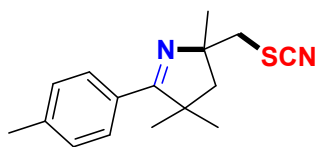

**5g**: yield: 67%, 36.5 mg; appearance: green oil;  $R_f$ : 0.3 (PE:EA, 5:1).  $^1\text{H}$  NMR (400 MHz,  $\text{CDCl}_3$ )  $\delta$  7.63 (d,  $J$  = 8.2 Hz, 2H), 7.19 (d,  $J$  = 8.0 Hz, 2H), 3.43 (d,  $J$  = 12.6 Hz, 1H), 3.19 (d,  $J$  = 12.6 Hz, 1H), 2.37 (s, 3H), 2.14 (d,  $J$  = 13.4 Hz, 1H), 1.93 (d,  $J$  = 13.4 Hz, 1H), 1.50 (s, 3H), 1.48 (s, 3H), 1.39 (s, 3H).  $^{13}\text{C}$  NMR (101 MHz,  $\text{CDCl}_3$ )  $\delta$  179.46, 140.08, 130.99, 128.98, 128.12, 113.57, 71.47, 52.25, 50.87, 47.12, 29.22, 28.15, 28.01, 21.30. ESI-MS: Calcd for  $\text{C}_{16}\text{H}_{20}\text{N}_2\text{S}$ :  $[\text{M}+\text{H}^+]$  273.1420, found 273.1419.

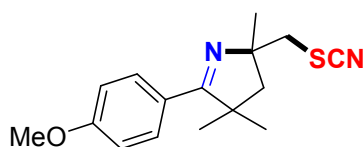

**5h**: yield: 55%, 31.7 mg; appearance: yellow oil;  $R_f$ : 0.2 (PE:EA, 5:1).  $^1\text{H}$  NMR (400 MHz,  $\text{CDCl}_3$ )  $\delta$  7.77 – 7.72 (m, 2H), 6.89 (d,  $J$  = 8.9 Hz, 2H), 3.82 (s, 3H), 3.43 (d,  $J$  = 12.6 Hz, 1H), 3.17 (d,  $J$  = 12.6 Hz, 1H), 2.13 (d,  $J$  = 13.4 Hz, 1H), 1.92 (d,  $J$  = 13.4 Hz, 1H), 1.51 (s, 3H), 1.47 (s, 3H), 1.40 (s, 3H).  $^{13}\text{C}$  NMR (101 MHz,  $\text{CDCl}_3$ )  $\delta$  178.53, 161.02, 129.86, 126.12, 113.64, 71.17, 55.28, 52.02, 51.12, 47.19, 29.33, 28.23, 28.00. ESI-MS: Calcd for  $\text{C}_{16}\text{H}_{20}\text{N}_2\text{OS}$ :  $[\text{M}+\text{H}^+]$  289.1369, found 289.1370.

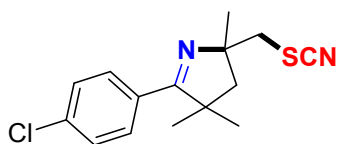

**5i**: yield: 68%, 39.7 mg; appearance: yellow oil;  $R_f$ : 0.2 (PE:EA, 5:1).  $^1\text{H}$  NMR (400 MHz,  $\text{CDCl}_3$ )  $\delta$  7.68 (d,  $J$  = 8.6 Hz, 2H), 7.36 (d,  $J$  = 8.6 Hz, 2H), 3.43 (d,  $J$  = 12.8 Hz, 1H), 3.17 (d,  $J$  = 12.8 Hz, 1H), 2.15 (d,  $J$  = 13.5 Hz, 1H), 1.94 (d,  $J$  = 13.5 Hz, 1H), 1.49 (s, 3H), 1.48 (s, 3H), 1.38 (s, 3H).  $^{13}\text{C}$  NMR (101 MHz,  $\text{CDCl}_3$ )  $\delta$  178.48, 136.16, 132.28, 129.57, 128.57, 113.37, 71.83, 52.28, 50.80, 46.87, 29.11, 28.00. ESI-MS: Calcd for  $\text{C}_{15}\text{H}_{17}\text{ClN}_2\text{S}$ :  $[\text{M}+\text{H}^+]$  293.0874, found 293.0875.

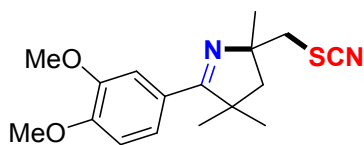

**5j**: yield: 81%, 51.5 mg; appearance: green oil;  $R_f$ : 0.2 (PE:EA, 3:1).  $^1\text{H}$  NMR (400 MHz,  $\text{CDCl}_3$ )  $\delta$  7.46 (d,  $J$  = 2.0 Hz, 1H), 7.32 (dd,  $J$  =

8.4, 2.0 Hz, 1H), 6.84 (d,  $J = 8.4$  Hz, 1H), 3.92 (s, 3H), 3.90 (s, 3H), 3.44 (d,  $J = 12.8$  Hz, 1H), 3.15 (d,  $J = 12.8$  Hz, 1H), 2.12 (d,  $J = 13.4$  Hz, 1H), 1.93 (d,  $J = 13.4$  Hz, 1H), 1.54 (s, 3H), 1.49 (s, 3H), 1.42 (s, 3H).  $^{13}\text{C}$  NMR (101 MHz,  $\text{CDCl}_3$ )  $\delta$  178.47, 150.82, 148.92, 126.42, 121.03, 113.56, 111.96, 110.24, 71.23, 56.01, 55.91, 52.00, 51.36, 47.12, 29.54, 28.36, 28.02. ESI-MS: Calcd for  $\text{C}_{17}\text{H}_{22}\text{N}_2\text{O}_2\text{S}$ :  $[\text{M}+\text{H}^+]$  319.1475, found 319.1477.

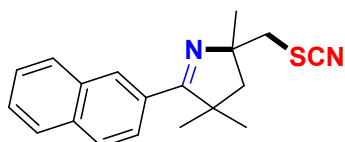

**5k**: yield: 50%, 32.4 mg; appearance: brown oil;  $R_f$ : 0.3 (PE:EA, 5:1).  $^1\text{H}$  NMR (400 MHz,  $\text{CDCl}_3$ )  $\delta$  8.20 (s, 1H), 7.90 – 7.83 (m, 4H), 7.55 – 7.50 (m, 2H), 3.48 (d,  $J = 12.7$  Hz, 1H), 3.24 (d,  $J = 12.7$  Hz, 1H), 2.21 (d,  $J = 13.4$  Hz, 1H), 2.00 (d,  $J = 13.4$  Hz, 1H), 1.60 (s, 3H), 1.54 (s, 3H), 1.48 (s, 3H).  $^{13}\text{C}$  NMR (101 MHz,  $\text{CDCl}_3$ )  $\delta$  179.51, 133.95, 132.81, 131.30, 128.71, 128.03, 128.00, 127.64, 127.05, 126.38, 125.63, 113.55, 71.79, 52.51, 51.02, 47.10, 29.39, 28.33, 28.07. ESI-MS: Calcd for  $\text{C}_{19}\text{H}_{20}\text{N}_2\text{S}$ :  $[\text{M}+\text{H}^+]$  309.1420, found 309.1421.

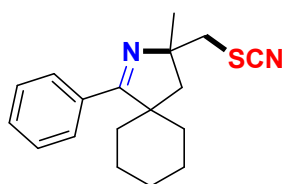

**5l**: yield: 80%, 47.7 mg; appearance: yellow oil;  $R_f$ : 0.2 (PE:EA, 5:1).  $^1\text{H}$  NMR (400 MHz,  $\text{CDCl}_3$ )  $\delta$  7.56 – 7.51 (m, 2H), 7.39 (dt,  $J = 5.7$ , 2.8 Hz, 3H), 3.45 (d,  $J = 12.7$  Hz, 1H), 3.21 (d,  $J = 12.7$  Hz, 1H), 2.08 (d,  $J = 13.6$  Hz, 1H), 2.03 (d,  $J = 13.6$  Hz, 1H), 1.85 – 1.55 (m, 9H), 1.49 (s, 3H), 1.32 – 1.24 (m, 1H).  $^{13}\text{C}$  NMR (101 MHz,  $\text{CDCl}_3$ )  $\delta$  180.92, 135.04, 129.26, 128.14, 128.06, 113.54, 72.53, 58.44, 47.08, 44.11, 35.28, 35.19, 28.83, 25.26, 23.09, 22.99. ESI-MS: Calcd for  $\text{C}_{18}\text{H}_{22}\text{N}_2\text{S}$ :  $[\text{M}+\text{H}^+]$  299.1576, found 299.1577.

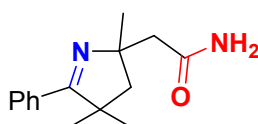

**7**: yield: 75%, 36.6 mg; appearance: yellow oil;  $R_f$ : 0.5 (pure EA).  $^1\text{H}$  NMR (400 MHz,  $\text{CDCl}_3$ )  $\delta$  7.69 (dd,  $J = 7.9$ , 1.6 Hz, 2H), 7.60 (s, 1H), 7.43 – 7.37 (m, 3H), 5.58 (s, 1H), 2.57 (d,  $J = 14.8$  Hz, 1H), 2.51 (d,  $J = 14.8$  Hz, 1H), 2.00 (d,  $J = 13.3$  Hz, 1H), 1.95 (d,  $J = 13.3$  Hz, 1H), 1.45 (s, 3H), 1.44 (s, 3H), 1.36 (s, 3H).

$^{13}\text{C}$  NMR (101 MHz,  $\text{CDCl}_3$ )  $\delta$  178.04, 173.86, 134.29, 129.76, 128.28, 127.97, 69.83, 53.45, 51.07, 50.28, 28.84, 28.68, 28.00. ESI-MS: Calcd for  $\text{C}_{15}\text{H}_{20}\text{N}_2\text{O}$ :  $[\text{M}+\text{H}^+]$  245.1648, found 245.1649.

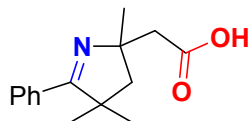

**8:** yield: 83%, 40.7 mg; appearance: slight yellow oil;  $R_f$ : 0.5 (PE:EA, 1:1).  $^1\text{H}$  NMR (400 MHz,  $\text{CDCl}_3$ )  $\delta$  9.75 (s, 1H), 7.72 (dd,  $J = 8.2, 1.3$  Hz, 2H), 7.49 – 7.38 (m, 3H), 2.75 (d,  $J = 15.5$  Hz, 1H), 2.56 (d,  $J = 15.5$  Hz, 1H), 2.03 (d,  $J = 13.3$  Hz, 1H), 1.97 (d,  $J = 13.3$  Hz, 1H), 1.51 (s, 3H), 1.46 (s, 3H), 1.41 (s, 3H).  $^{13}\text{C}$  NMR (101 MHz,  $\text{CDCl}_3$ )  $\delta$  178.91, 172.47, 132.64, 130.64, 128.48, 128.14, 69.05, 53.35, 51.30, 48.99, 28.80, 28.76, 27.67. ESI-MS: Calcd for  $\text{C}_{15}\text{H}_{19}\text{NO}_2$ :  $[\text{M}+\text{H}^+]$  246.1489, found 246.1487.

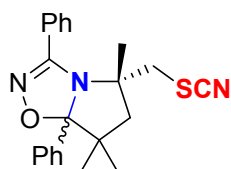

**9:** yield: 80%, 75.4 mg; appearance: white solid; M.p.: 151–155°C.  $R_f$ : 0.4 (PE:EA, 10:1).  $^1\text{H}$  NMR (400 MHz,  $\text{CDCl}_3$ )  $\delta$  7.81 (dd,  $J = 7.9, 1.6$  Hz, 2H), 7.77 (dd,  $J = 7.6, 1.9$  Hz, 2H), 7.70 (dd,  $J = 8.0, 1.5$  Hz, 4H), 7.43 (dt,  $J = 7.2, 3.8$  Hz, 7H), 7.36 – 7.28 (m, 7H), 3.62 (d,  $J = 13.3$  Hz, 1H), 3.38 (d,  $J = 13.3$  Hz, 1H), 3.08 (d,  $J = 12.9$  Hz, 1H), 2.78 (d,  $J = 12.9$  Hz, 1H), 2.42 (t,  $J = 12.9$  Hz, 2H), 2.19 (d,  $J = 13.7$  Hz, 1H), 2.09 (d,  $J = 12.9$  Hz, 1H), 1.78 (s, 3H), 1.37 (s, 3H), 1.35 (s, 3H), 1.21 (s, 3H), 0.88 (s, 3H), 0.85 (s, 3H).  $^{13}\text{C}$  NMR (101 MHz,  $\text{CDCl}_3$ )  $\delta$  159.73, 159.31, 139.61, 139.45, 131.40, 131.01, 129.22, 129.02, 128.52, 128.47, 128.42, 128.01, 127.68, 127.61, 127.53, 125.93, 125.91, 114.38, 114.16, 112.58, 112.34, 66.74, 66.41, 53.71, 52.00, 46.15, 45.32, 43.53, 43.46, 28.86, 28.63, 28.48, 26.01, 24.84, 24.53. ESI-MS: Calcd for  $\text{C}_{22}\text{H}_{23}\text{N}_3\text{OS}$ :  $[\text{M}+\text{H}^+]$  378.1635, found 378.1632.

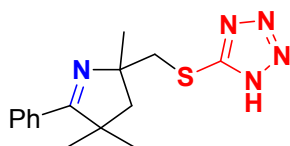

**10:** yield: 78%, 47.0 mg; appearance: white solid; M.p.: 201–206 °C.  $R_f$ : 0.9 (pure EA).  $^1\text{H}$  NMR (400 MHz,  $\text{CDCl}_3$ )  $\delta$  7.64 (dd,  $J = 8.0, 1.5$  Hz, 2H), 7.52 – 7.43 (m, 3H), 7.00 (s, 1H), 3.29 (d,  $J = 15.0$  Hz, 1H), 3.21 (d,  $J = 15.0$  Hz,

1H), 2.13 (d,  $J = 13.3$  Hz, 1H), 2.07 (d,  $J = 13.3$  Hz, 1H), 1.57 (s, 3H), 1.52 (s, 3H), 1.43 (s, 3H).  $^{13}\text{C}$  NMR (101 MHz,  $\text{CDCl}_3$ )  $\delta$  182.05, 154.27, 132.69, 130.87, 128.89, 127.85, 71.50, 52.37, 51.60, 45.36, 28.59, 28.37, 27.43. ESI-MS: Calcd for  $\text{C}_{15}\text{H}_{19}\text{N}_5\text{S}$ :  $[\text{M}+\text{H}^+]$  302.1434, found 302.1438.

## NMR Spectra:

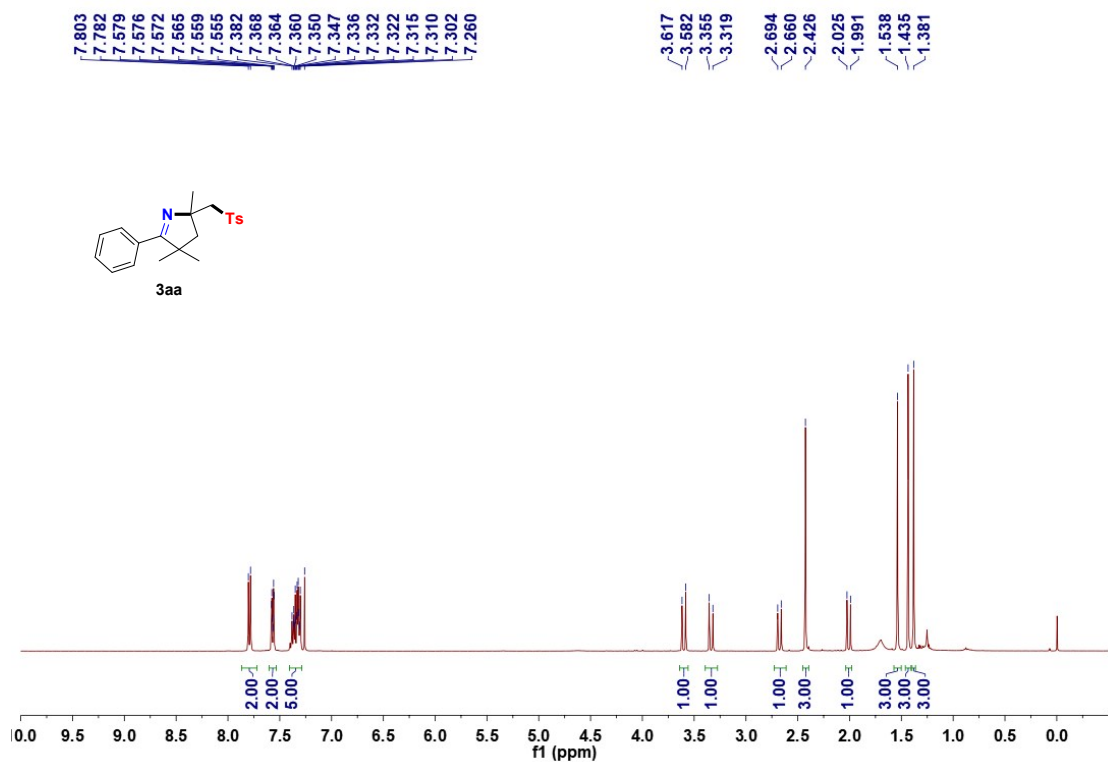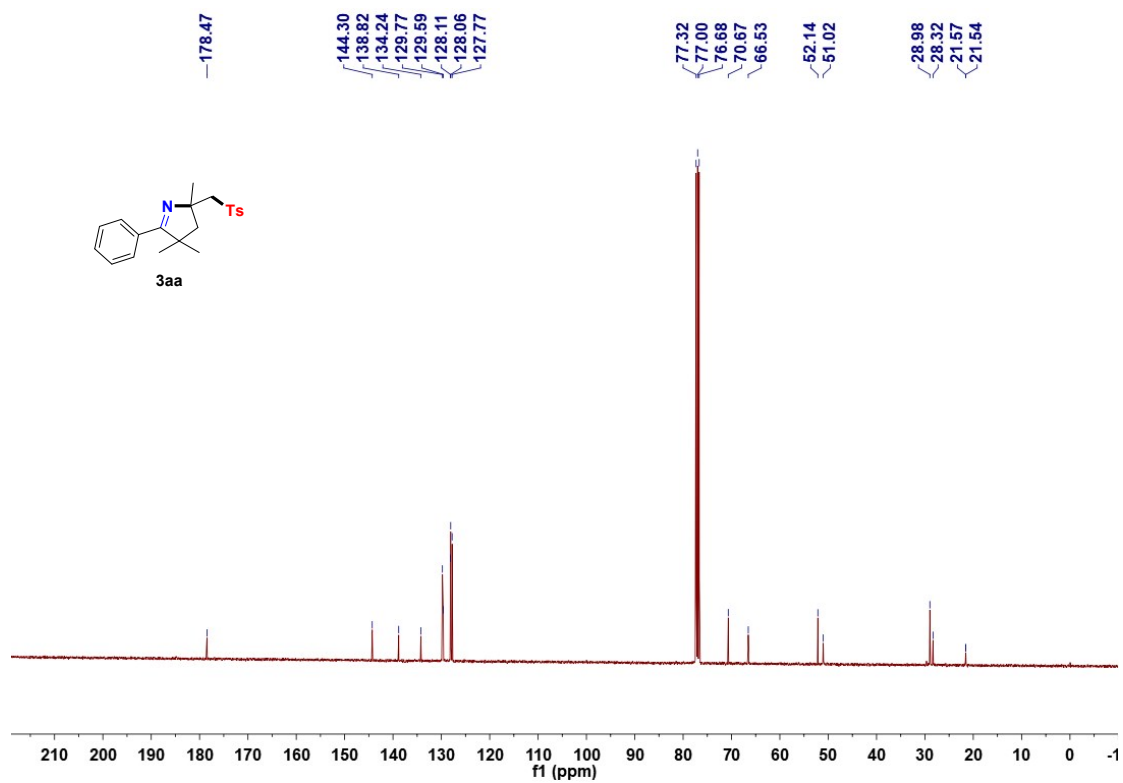

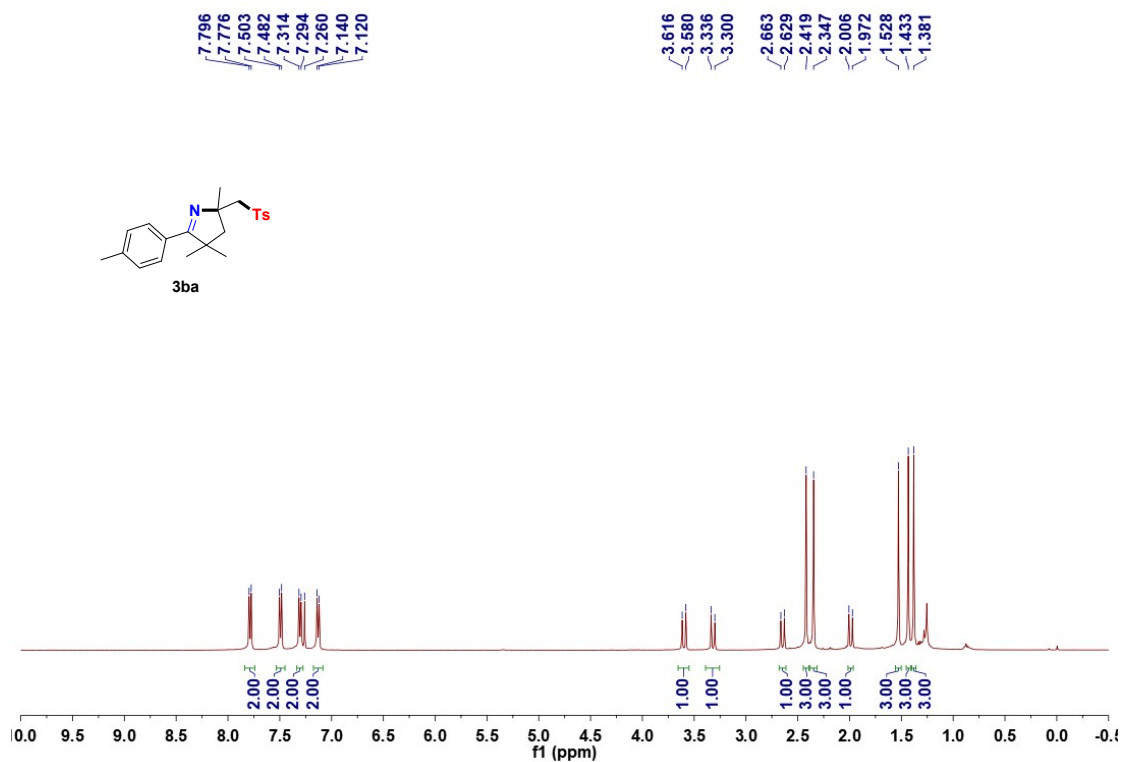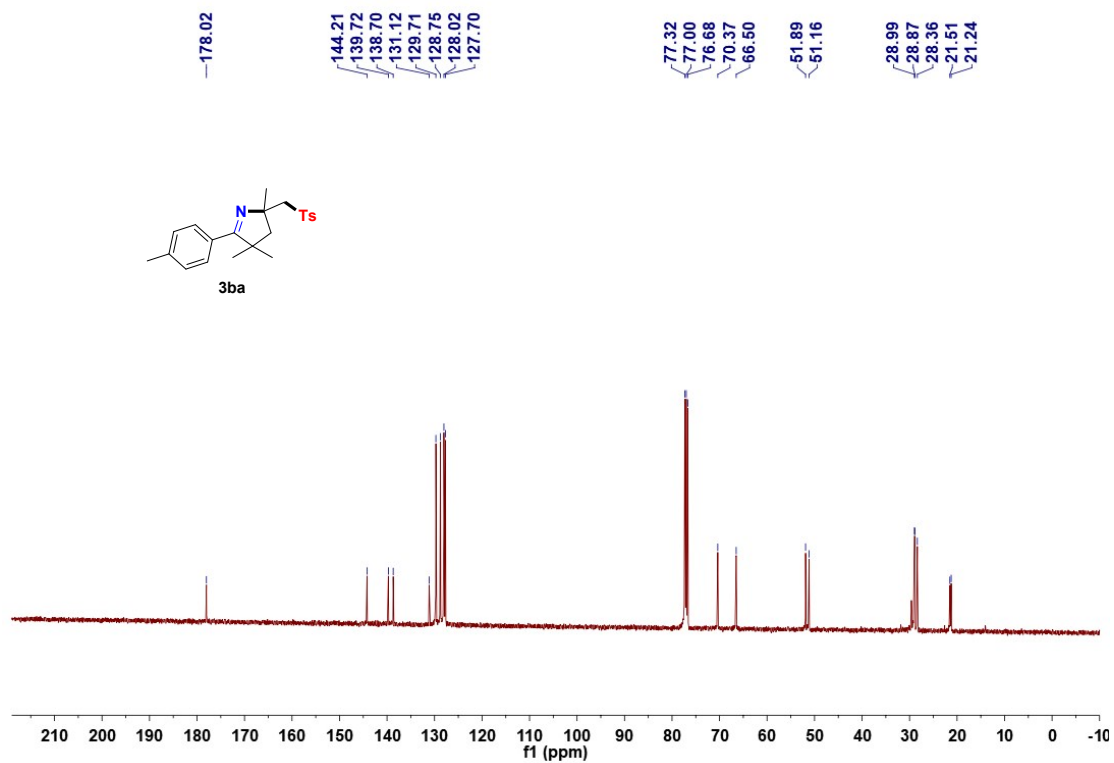

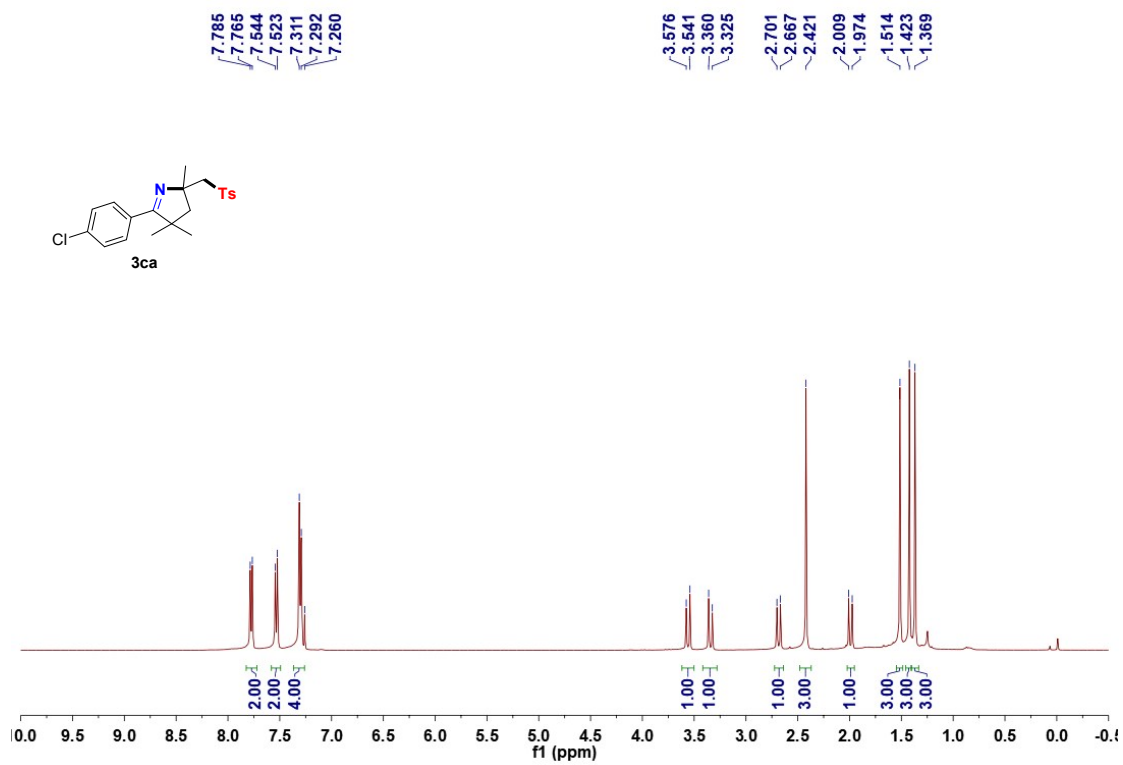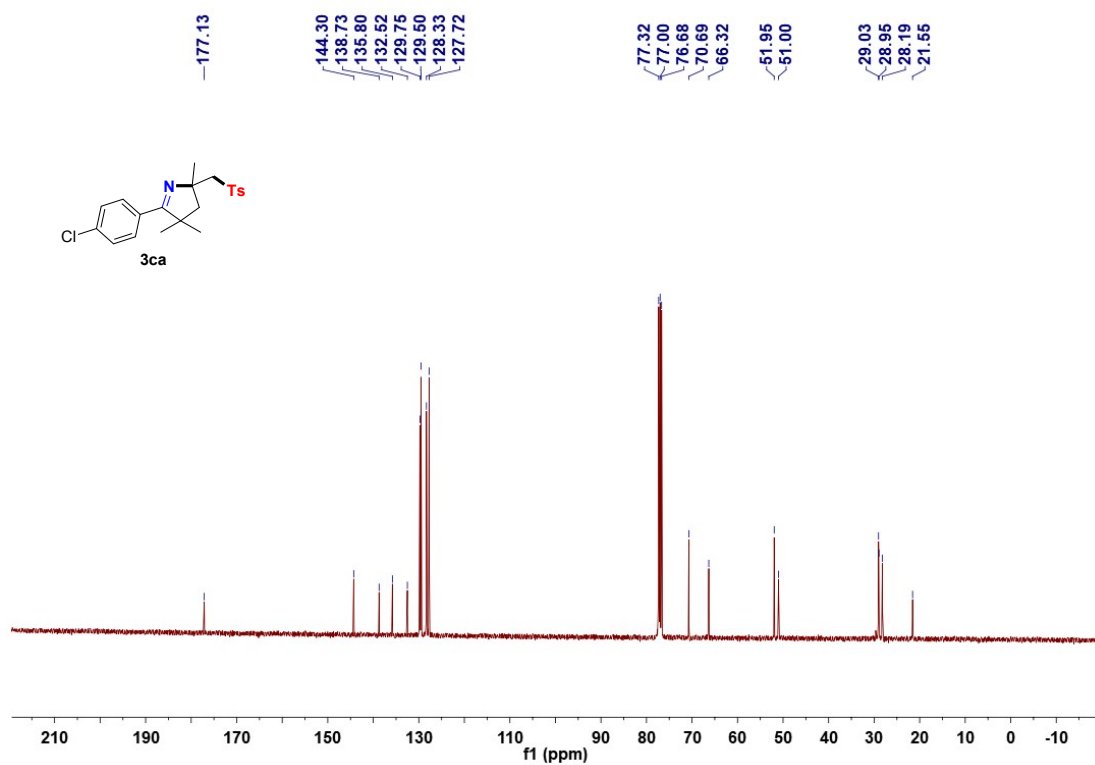

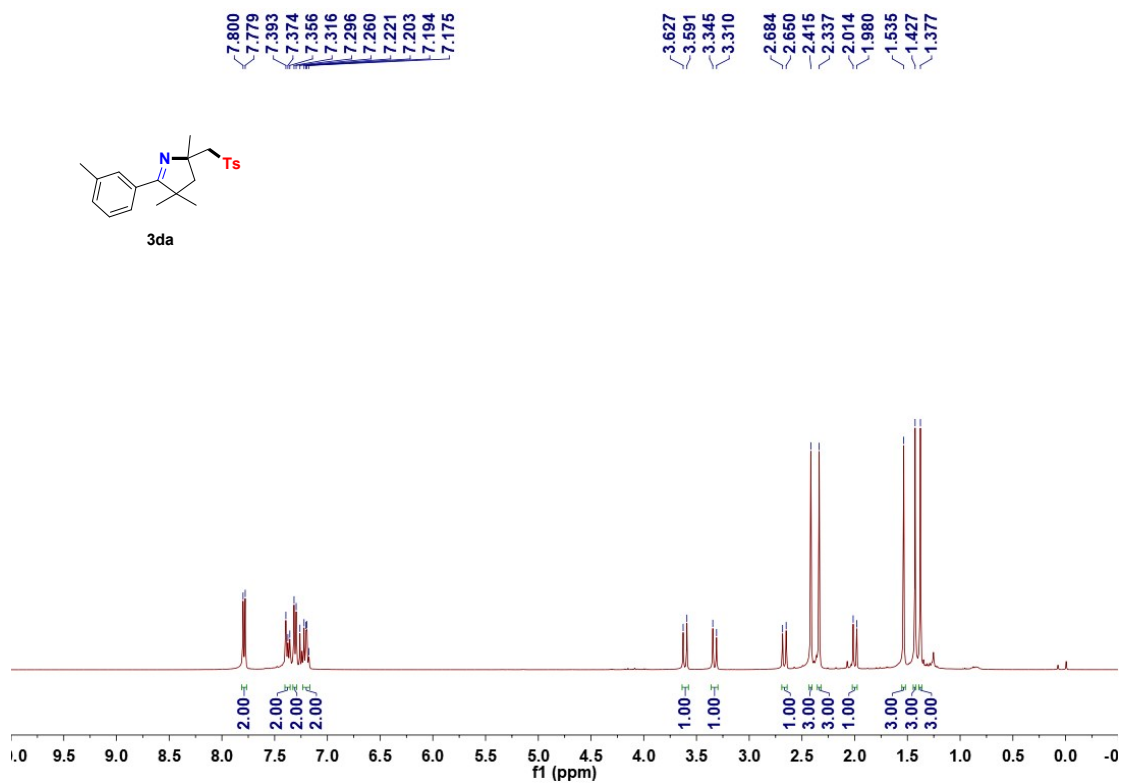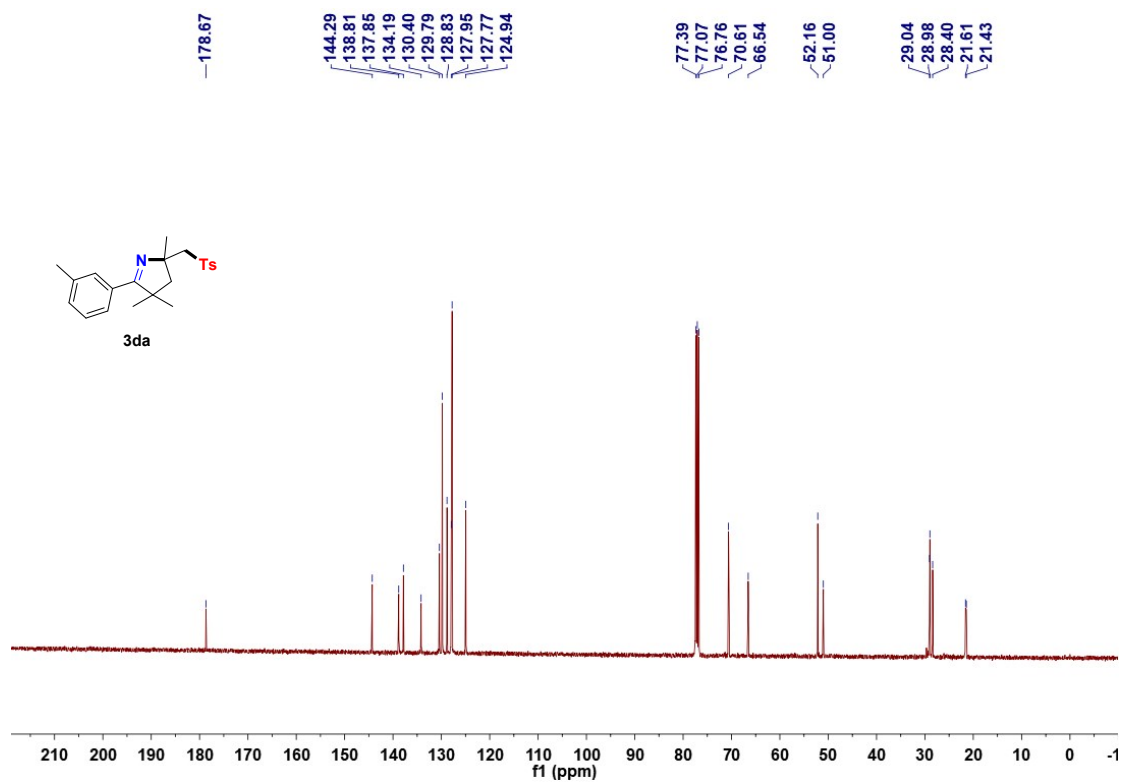

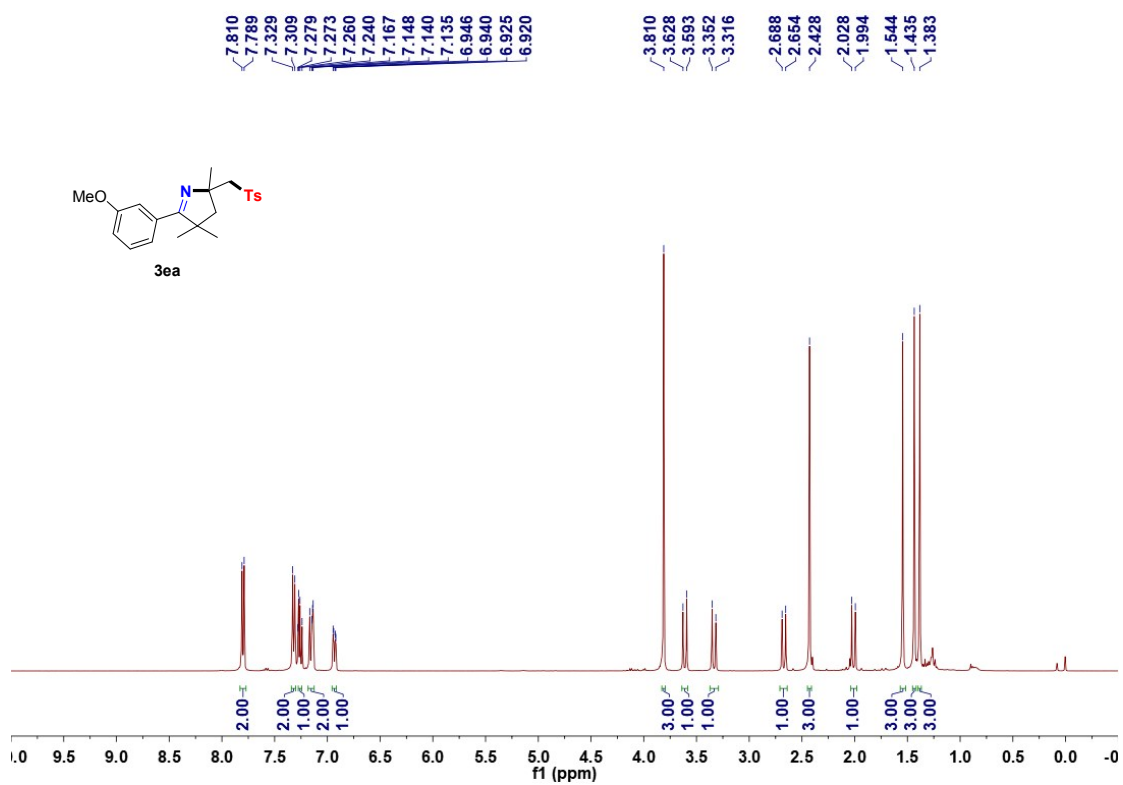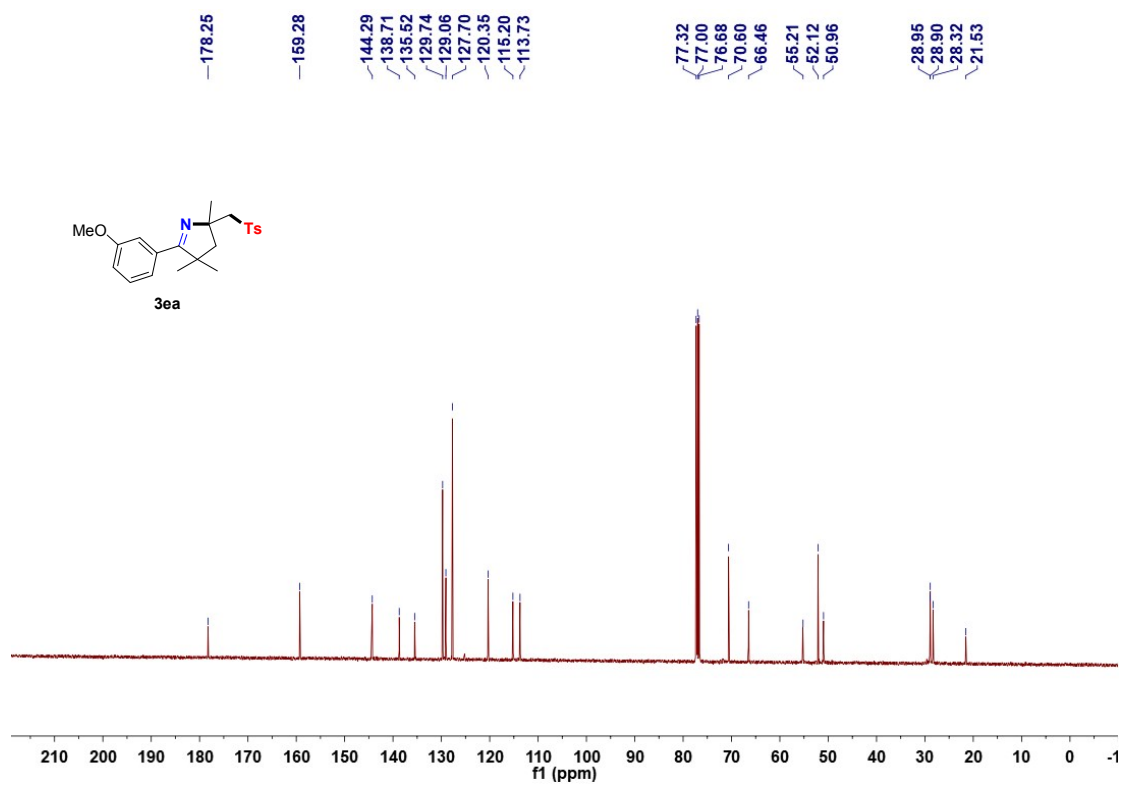

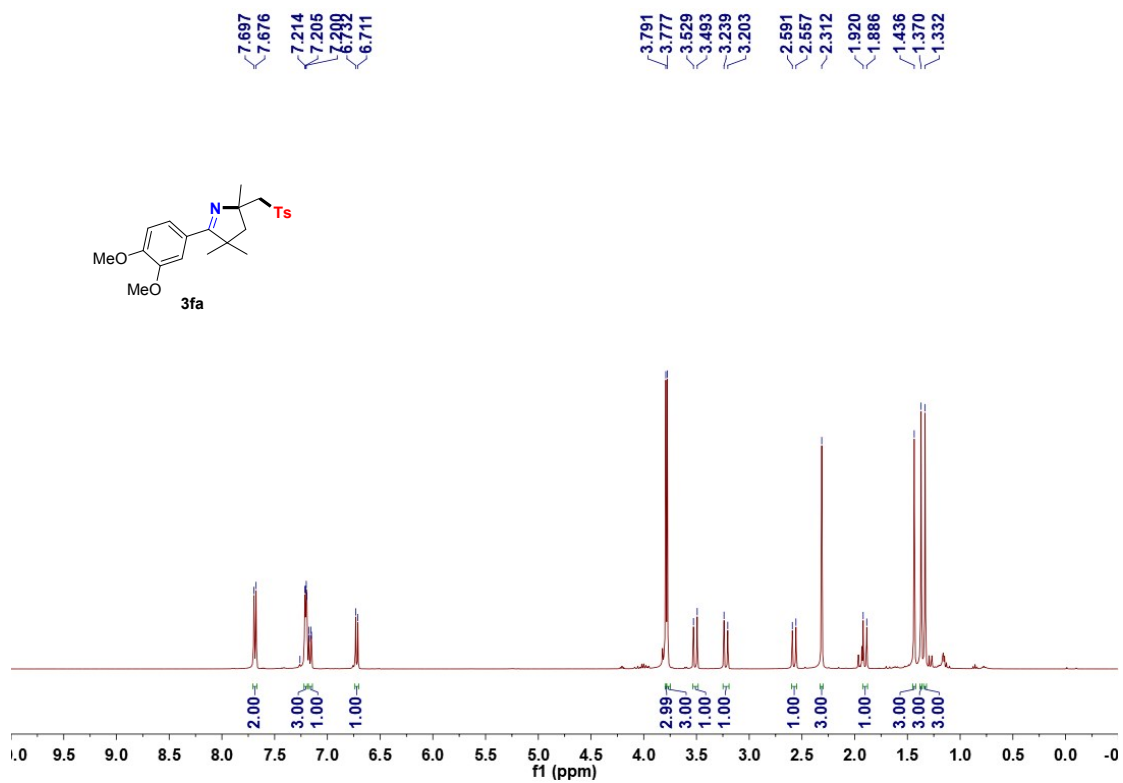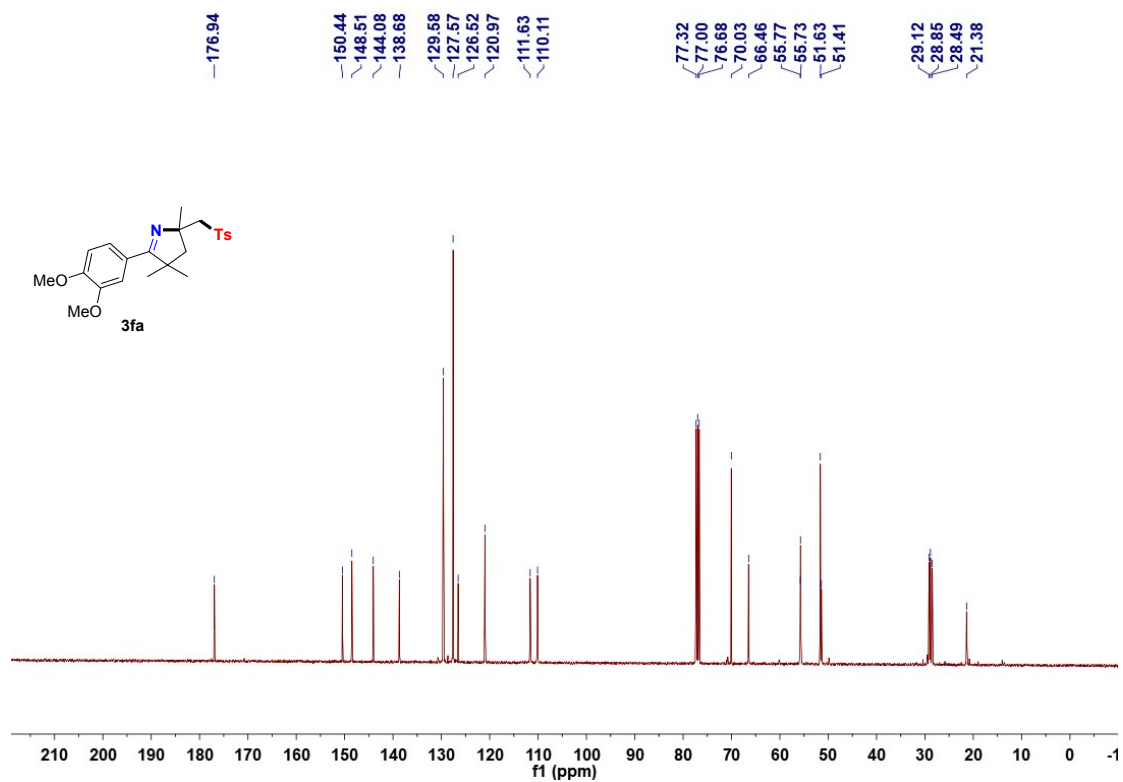

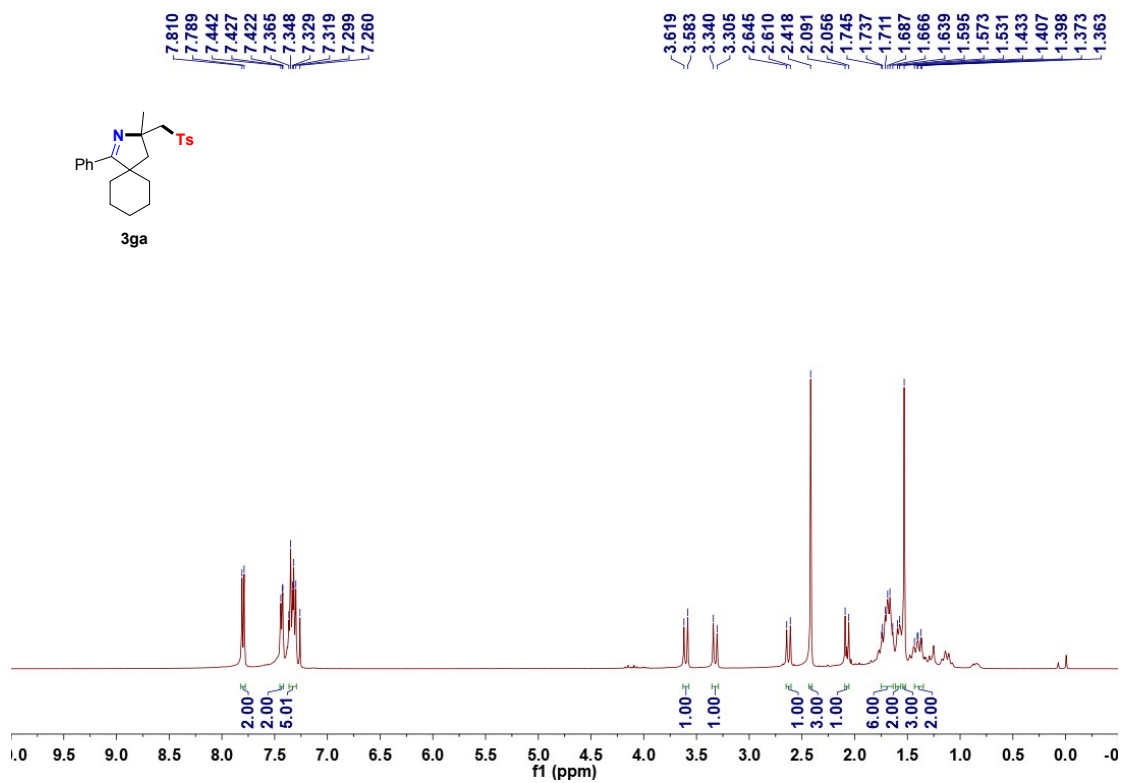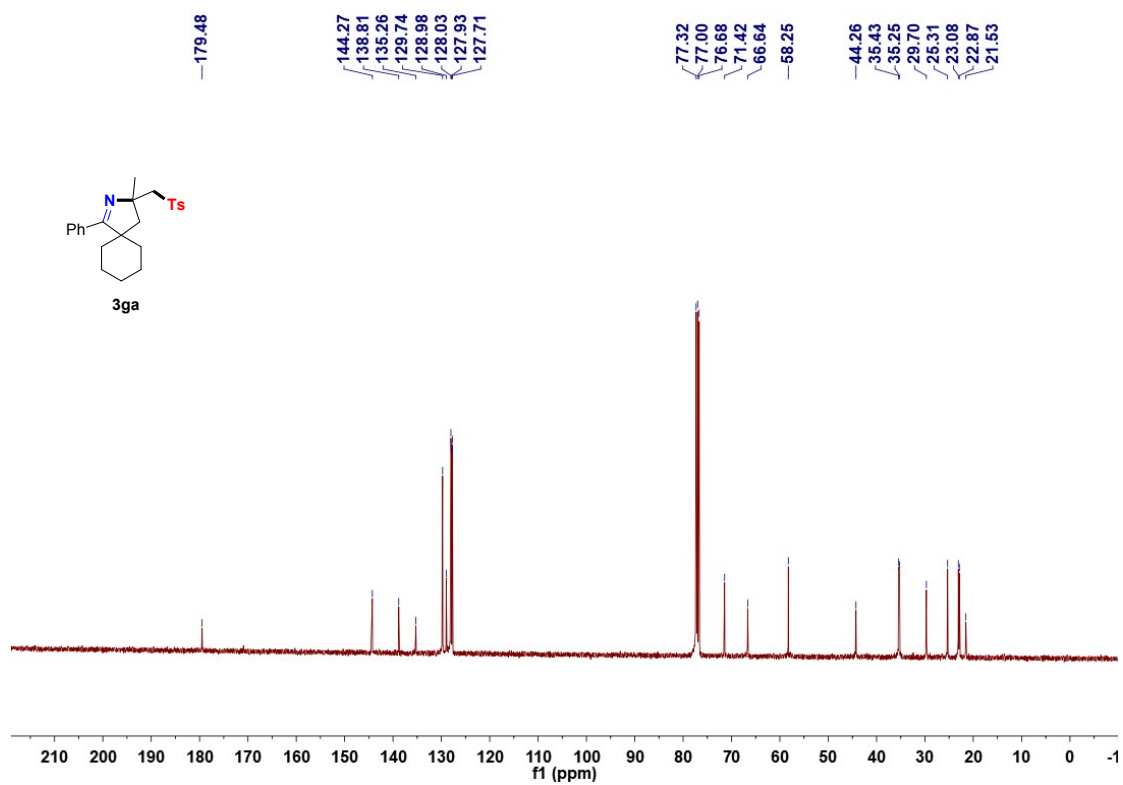

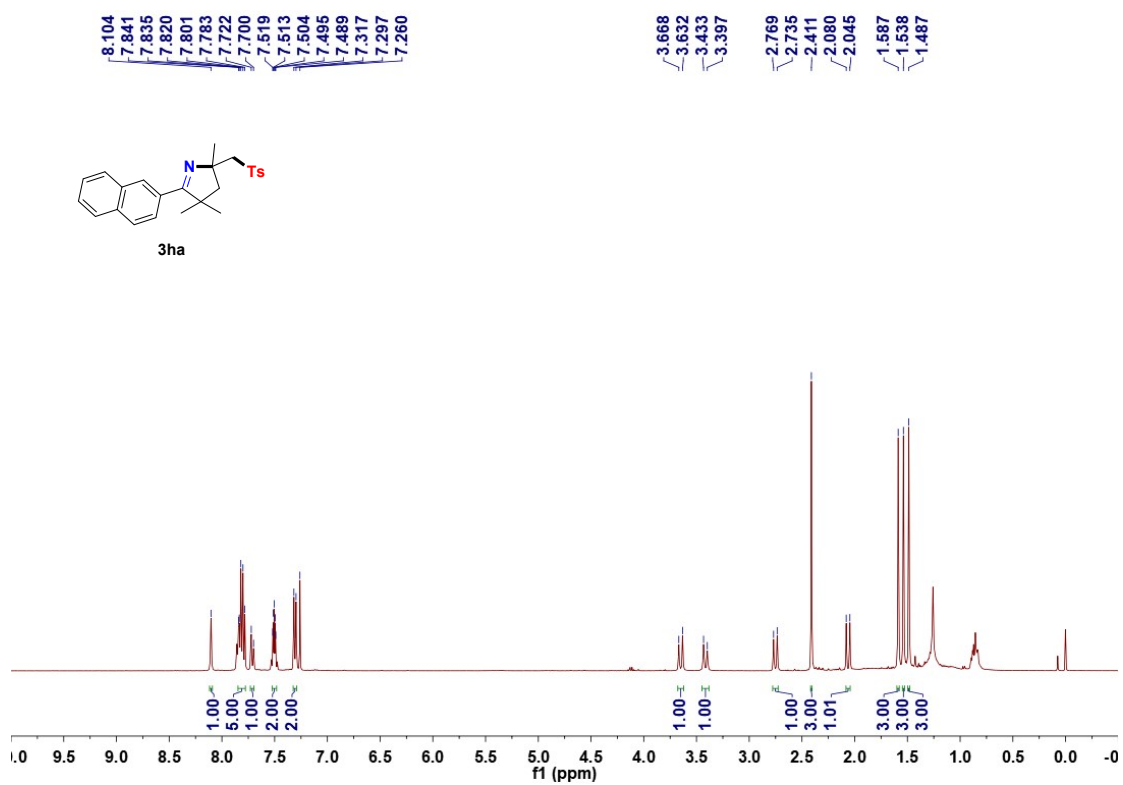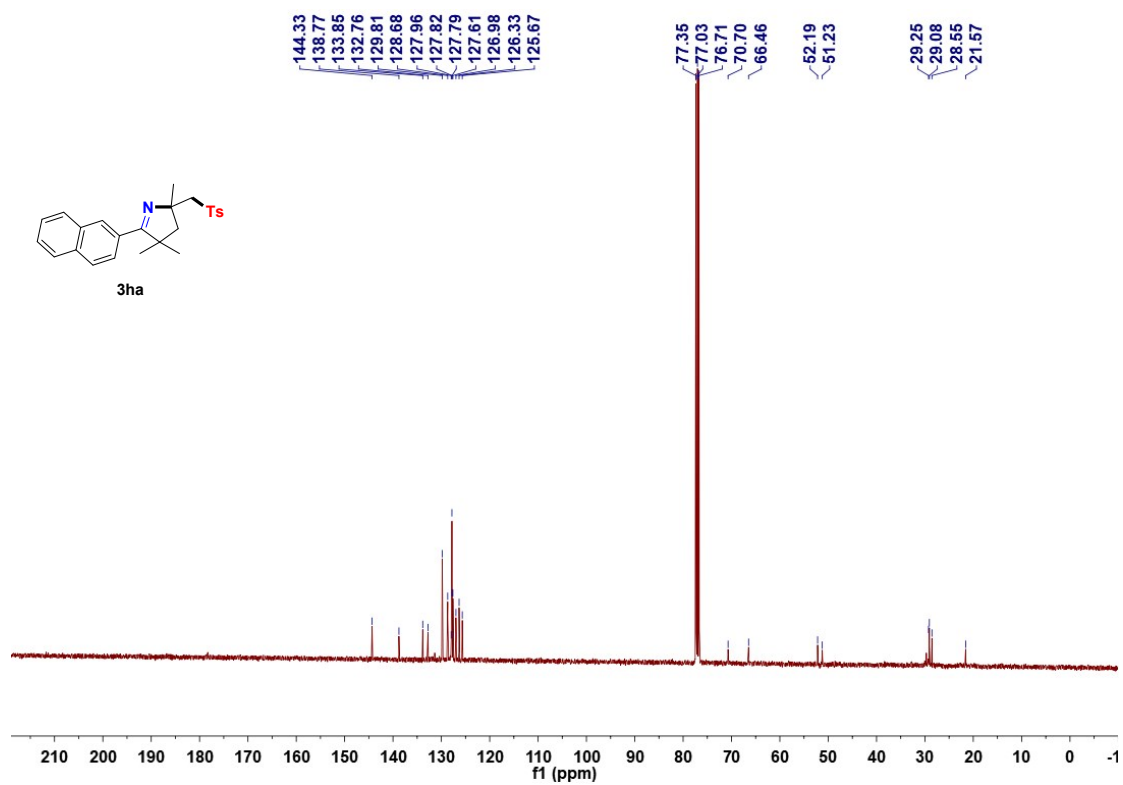



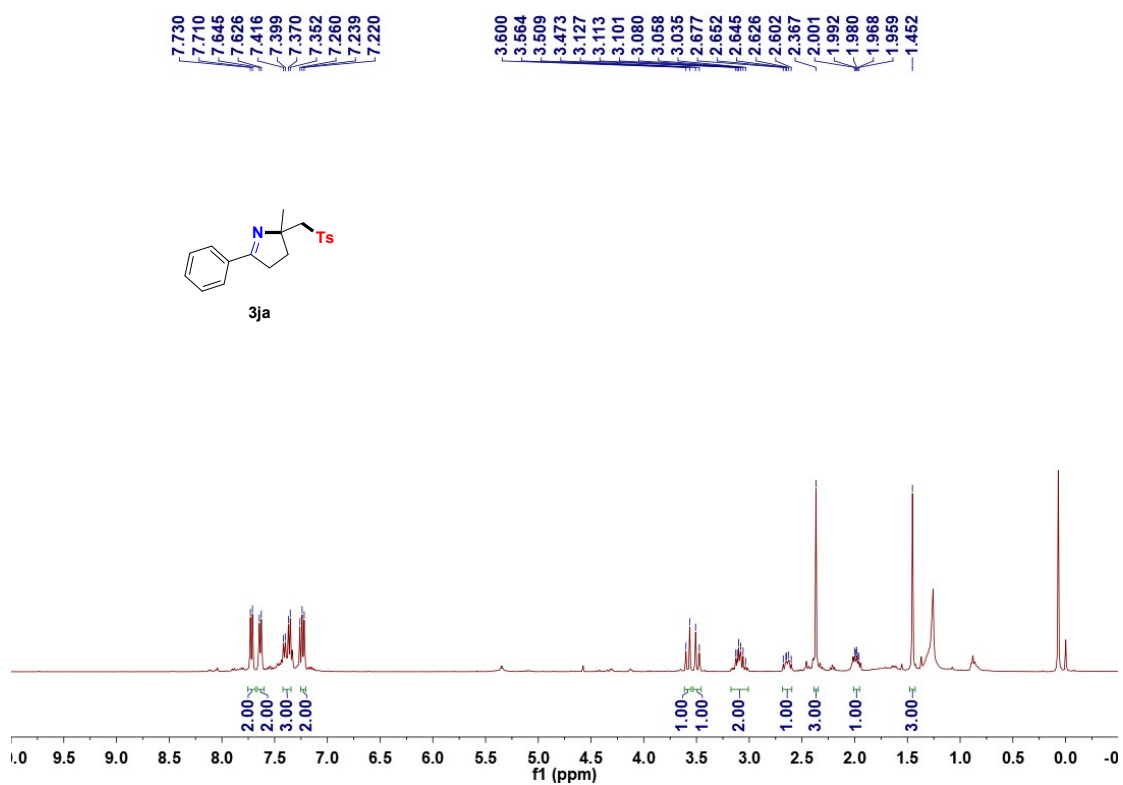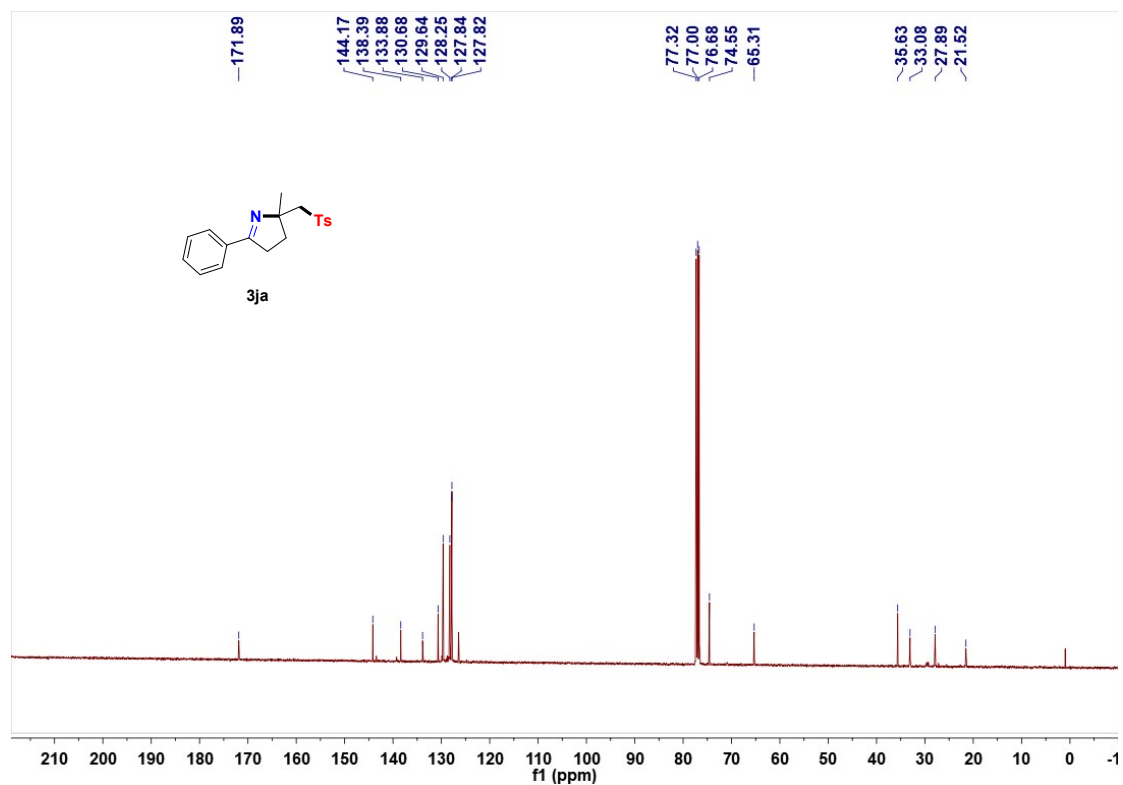

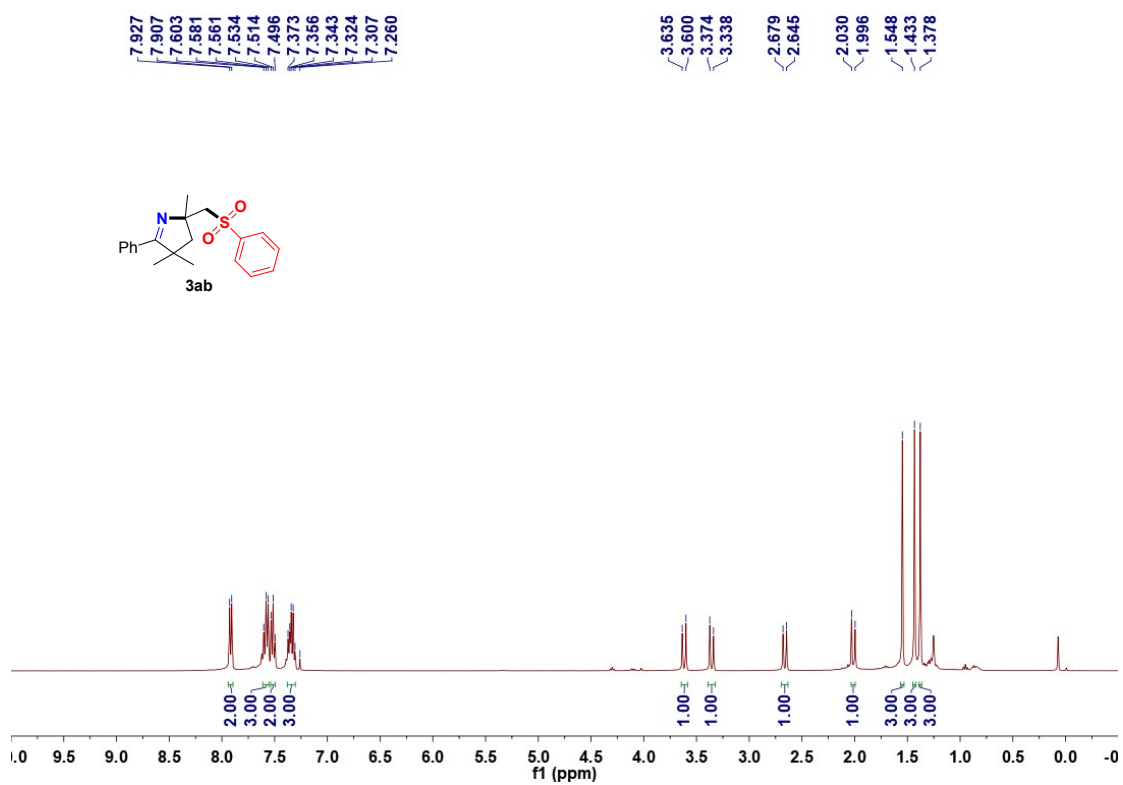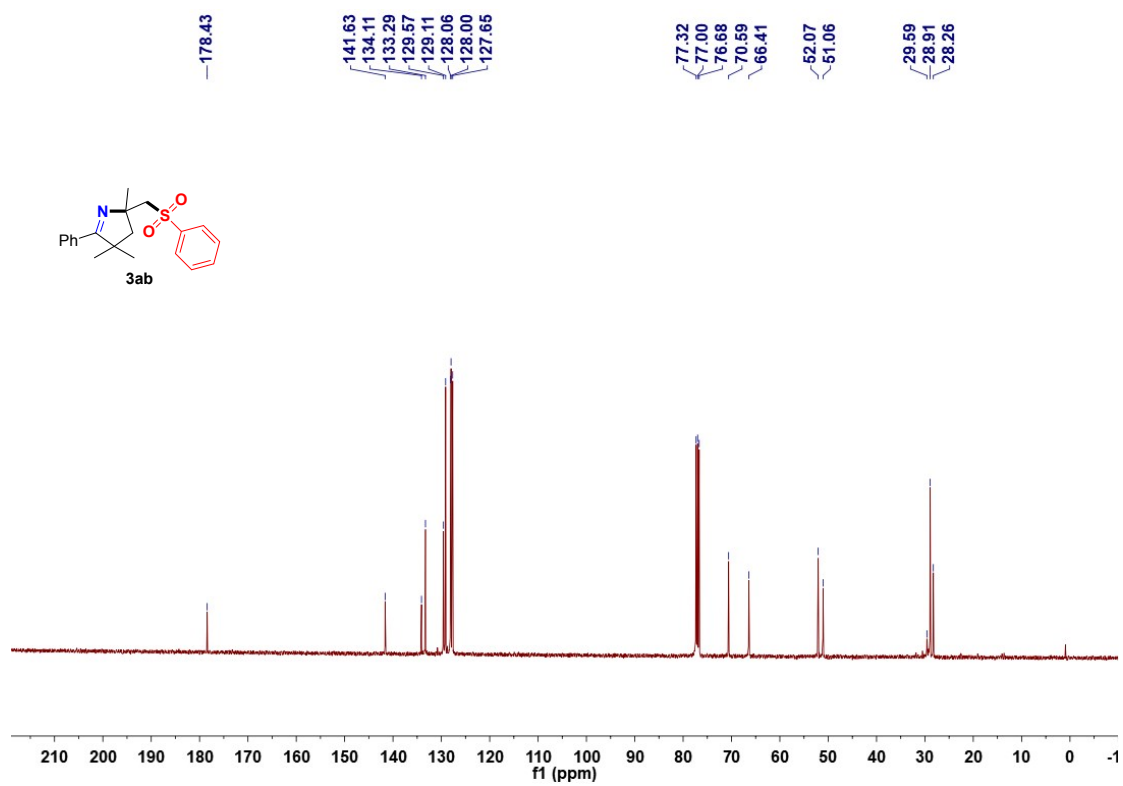

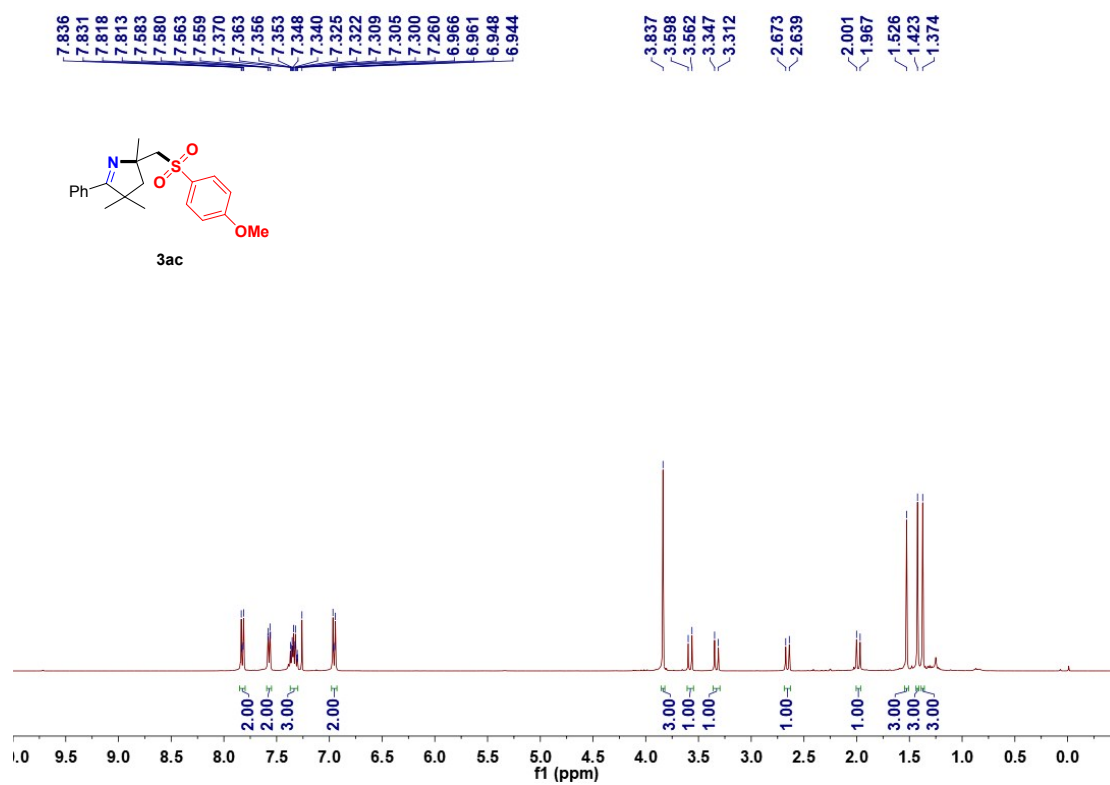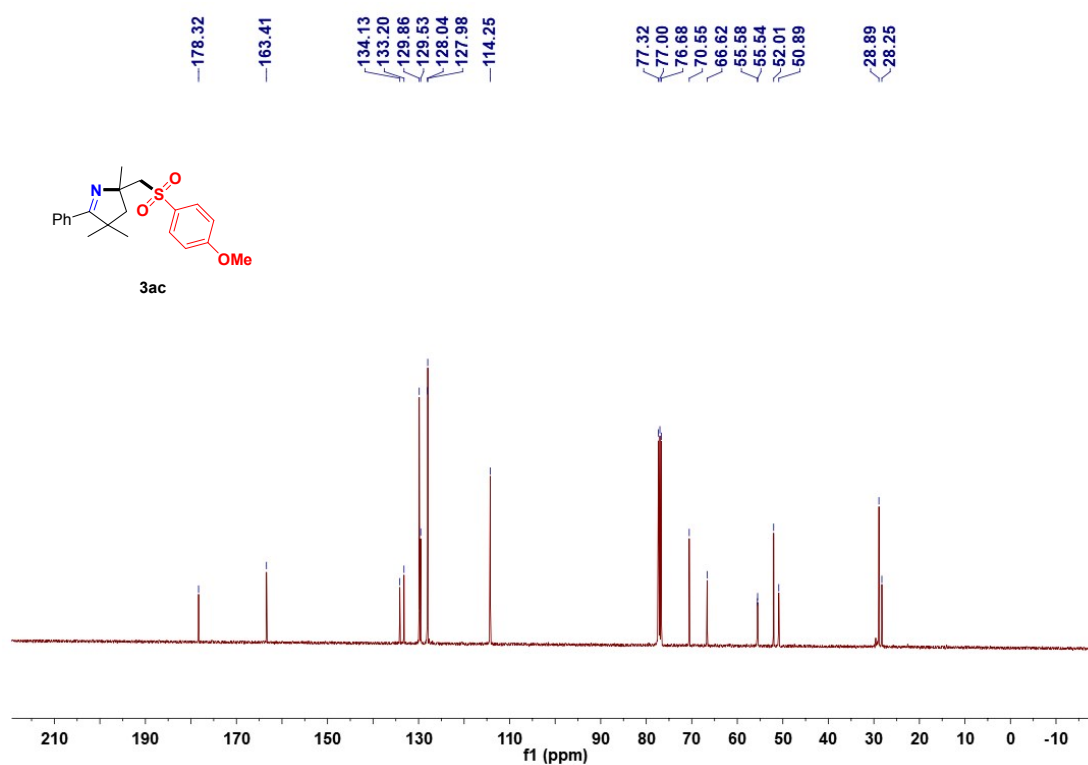

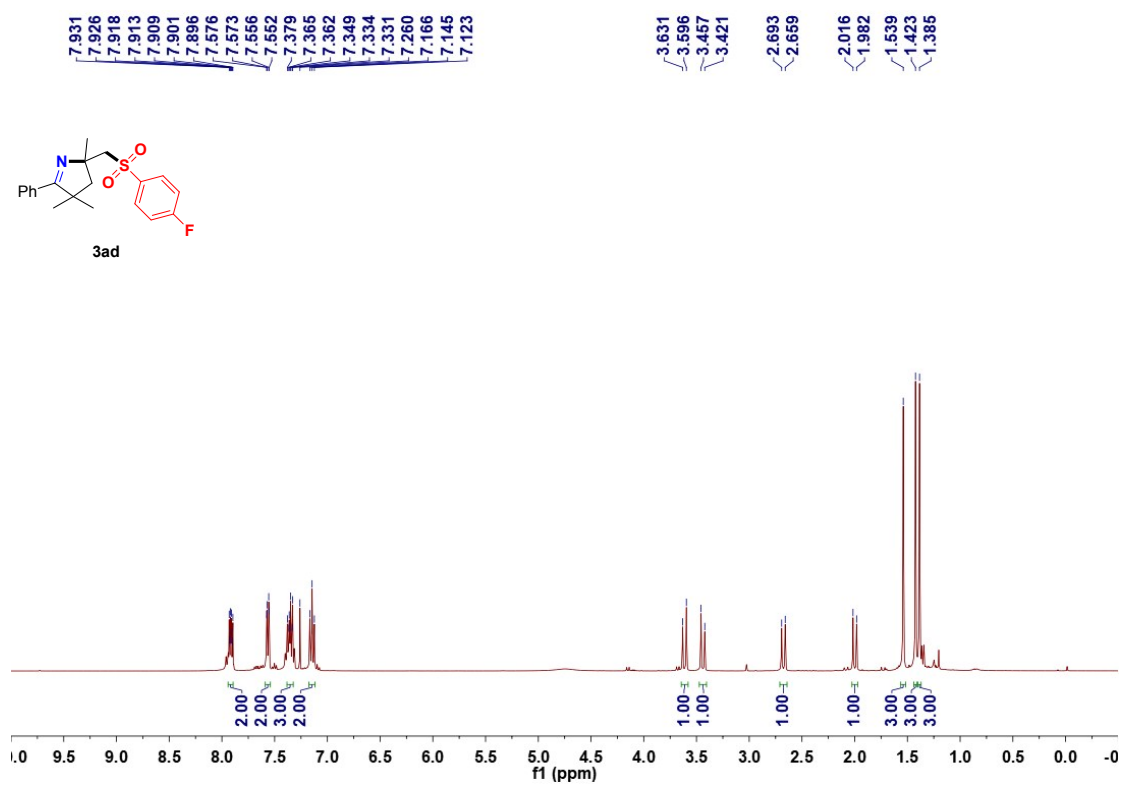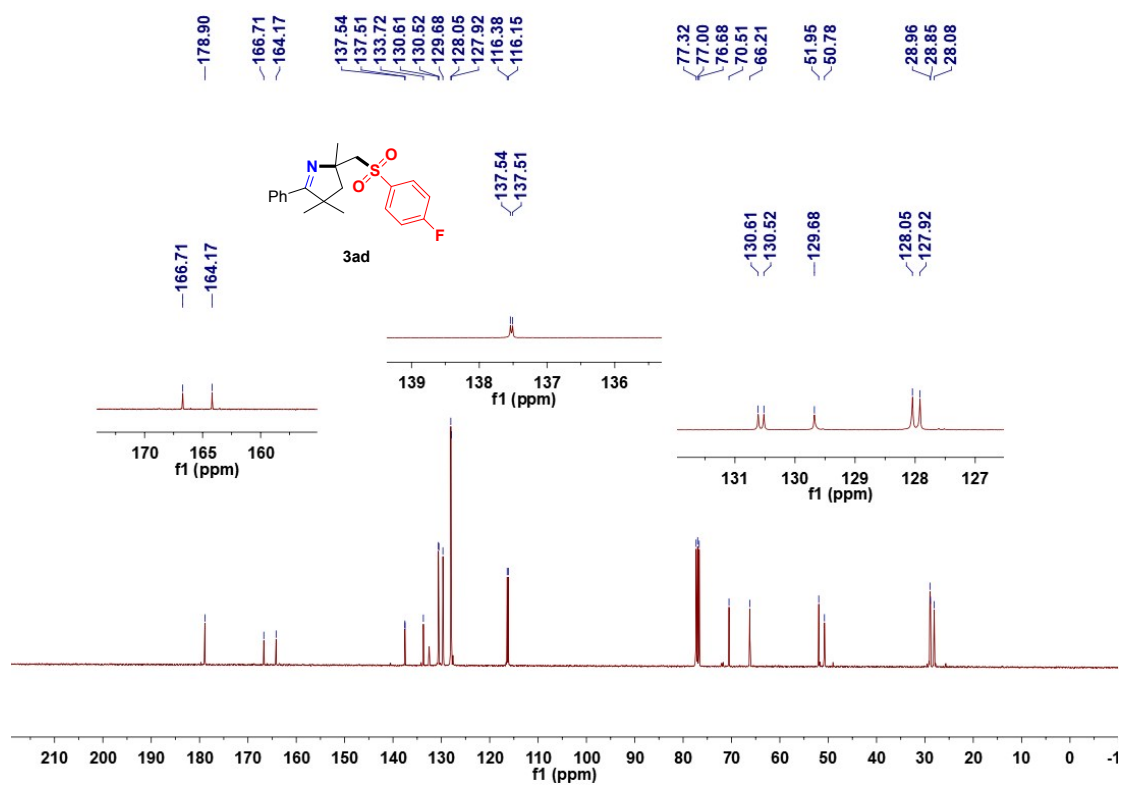

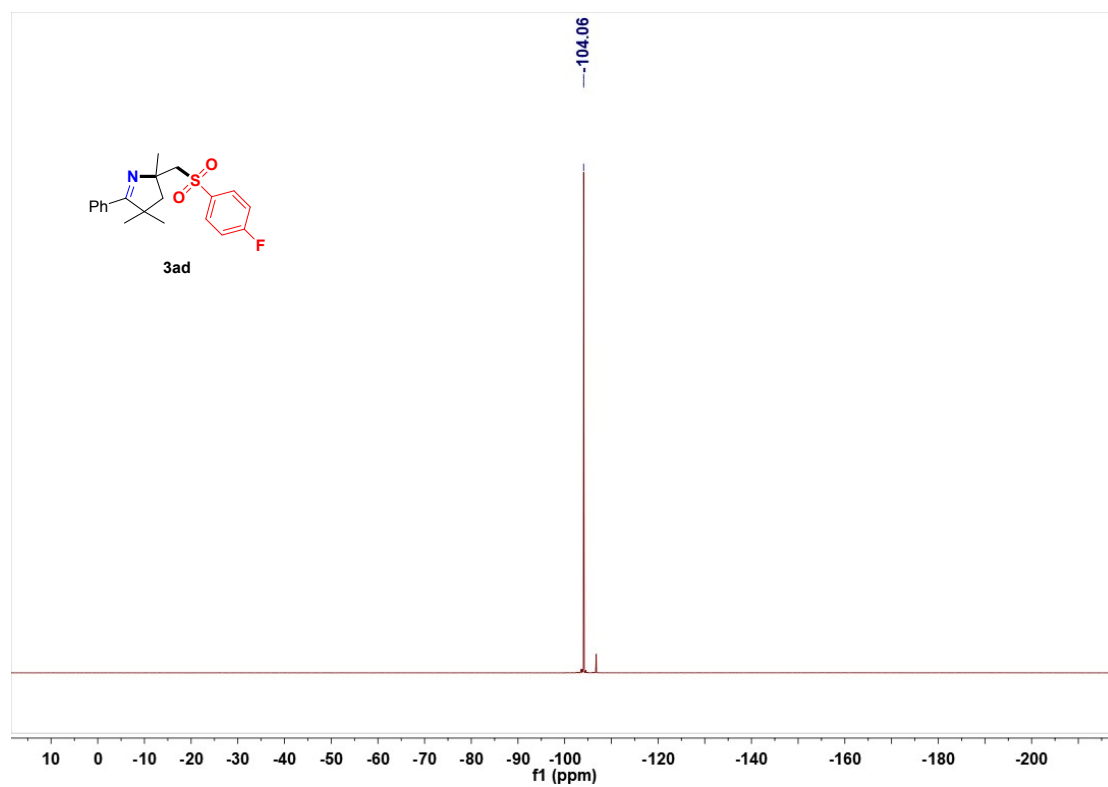

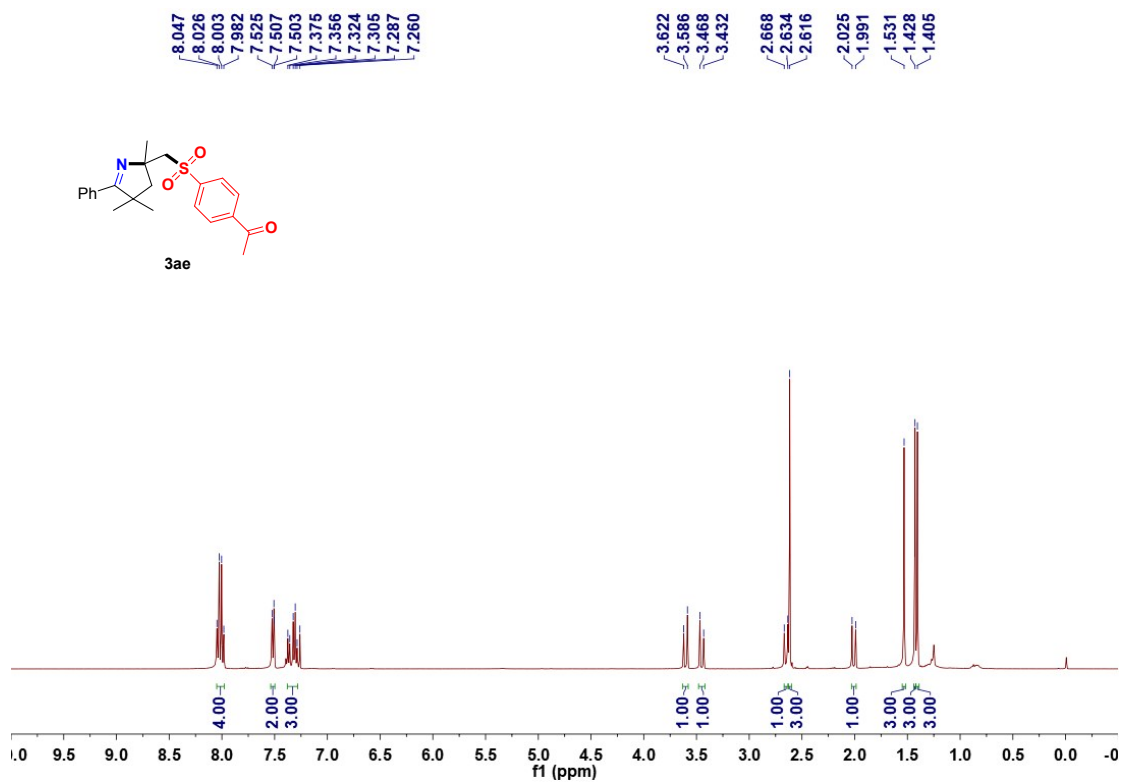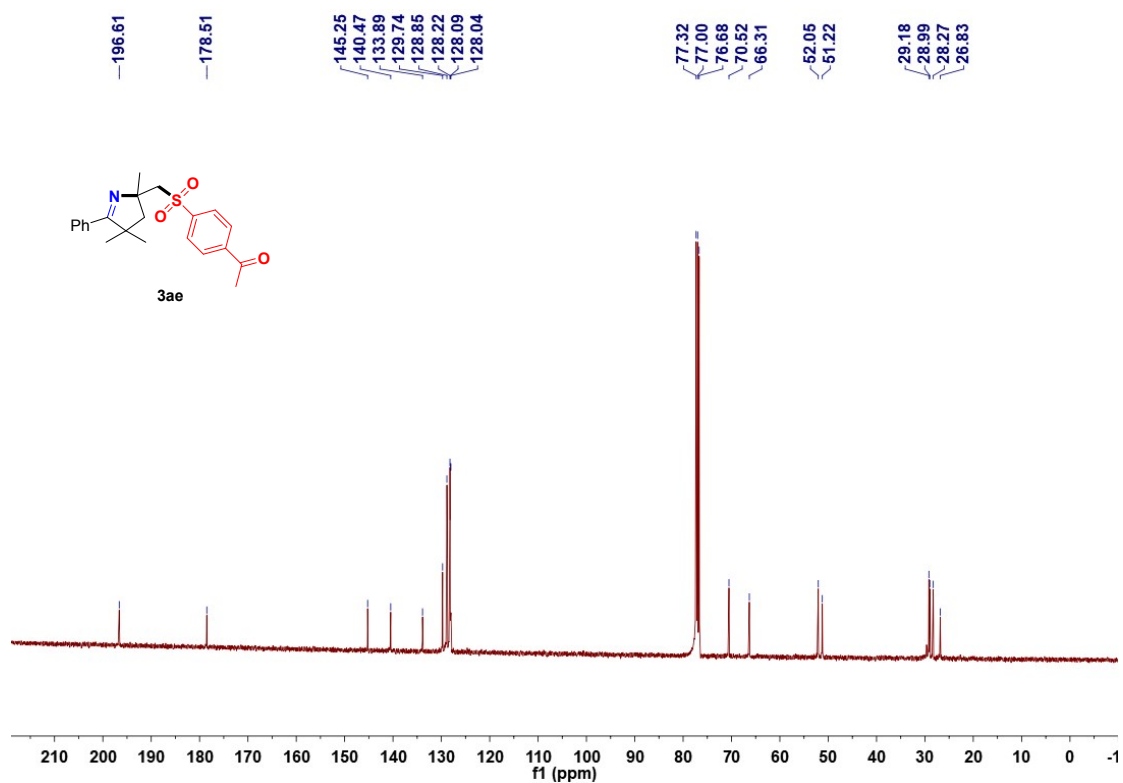

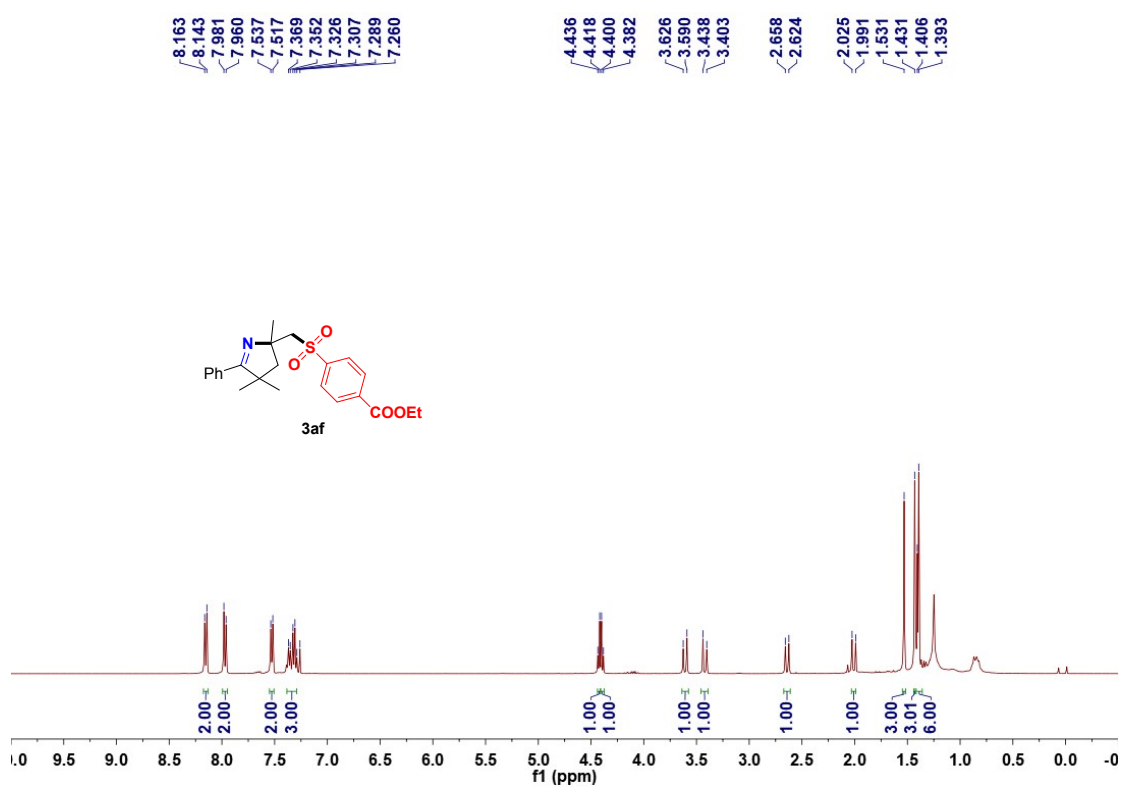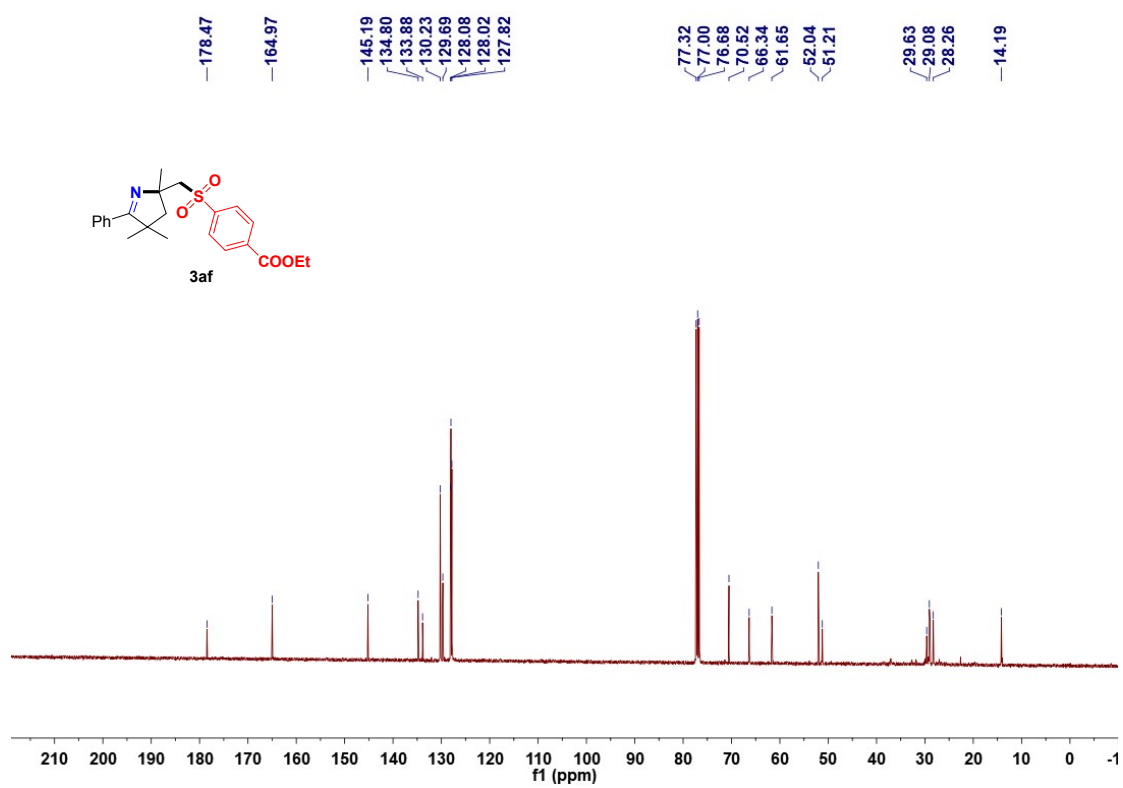

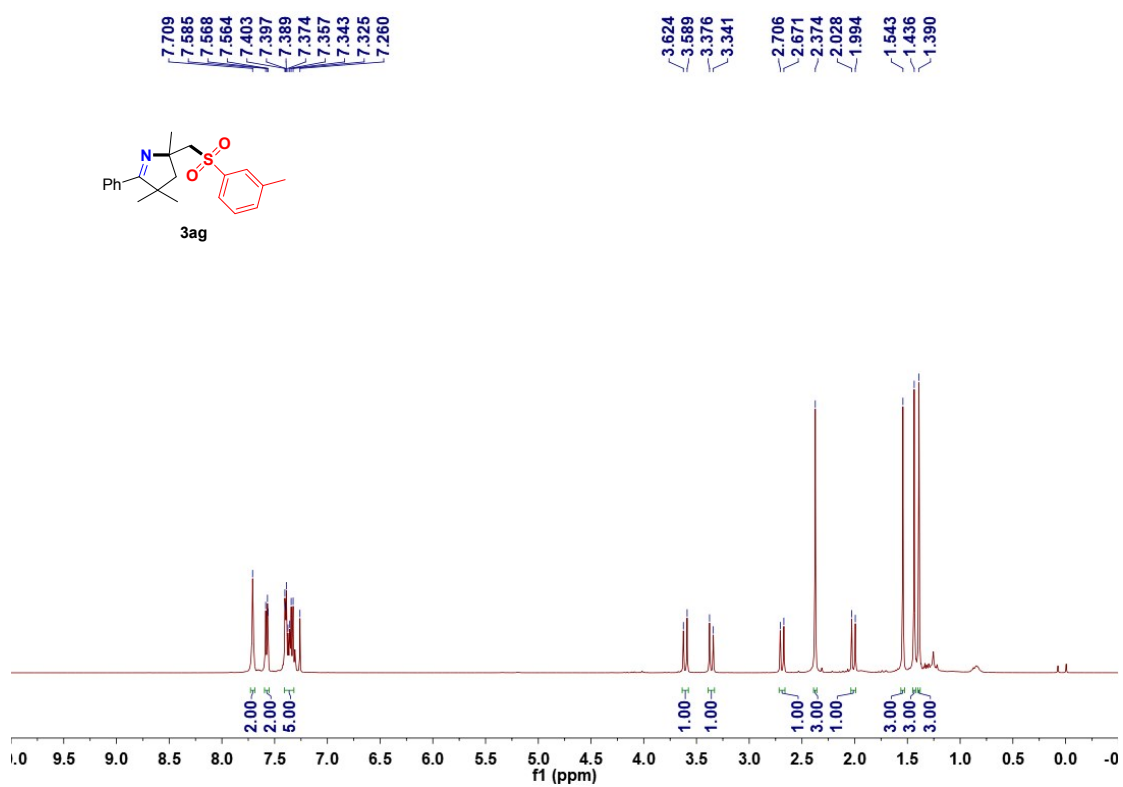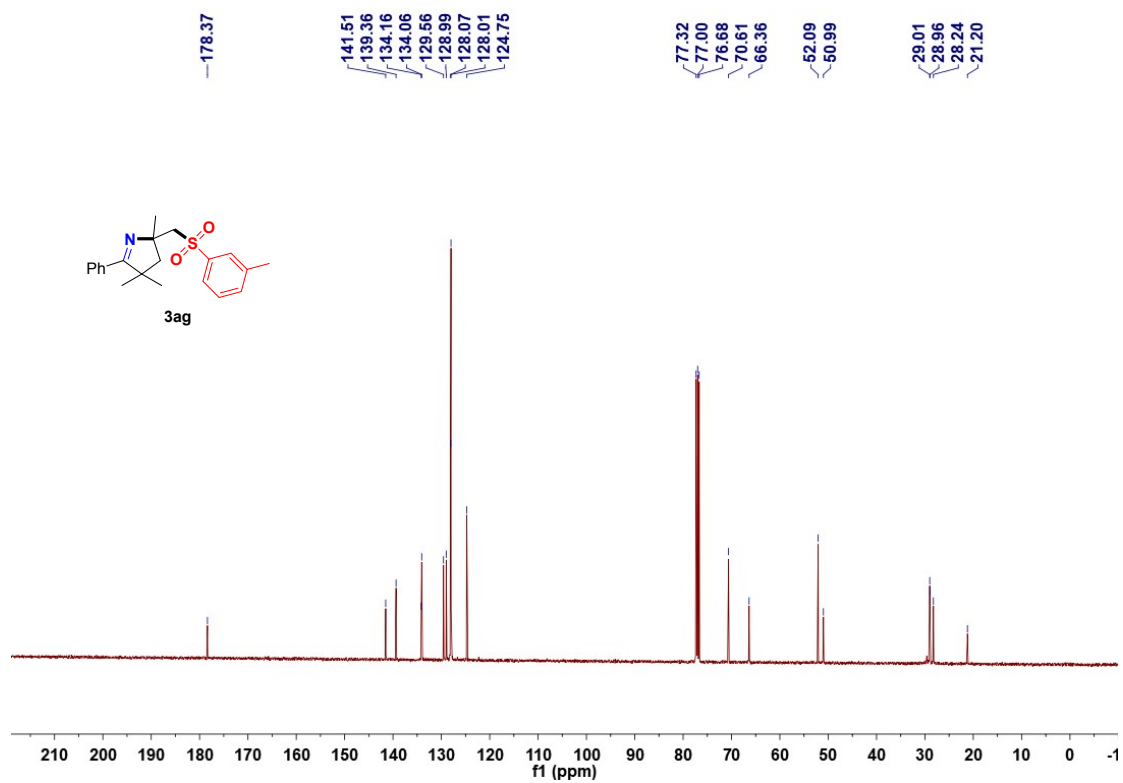

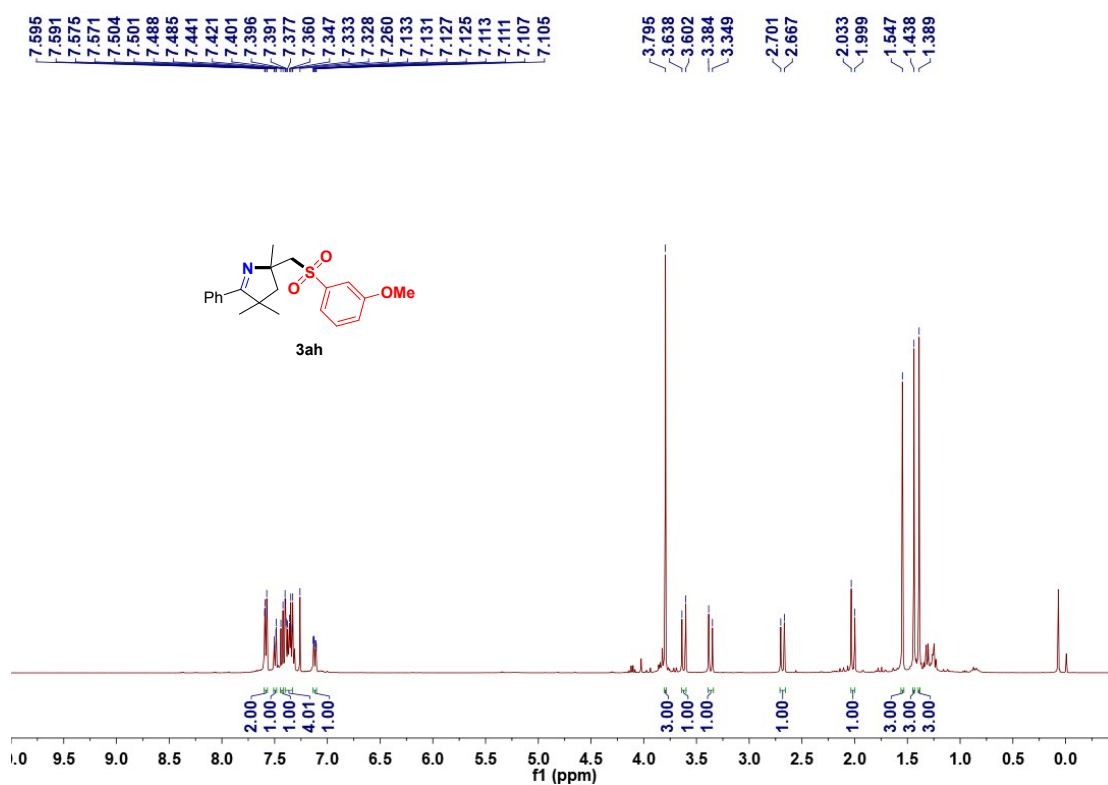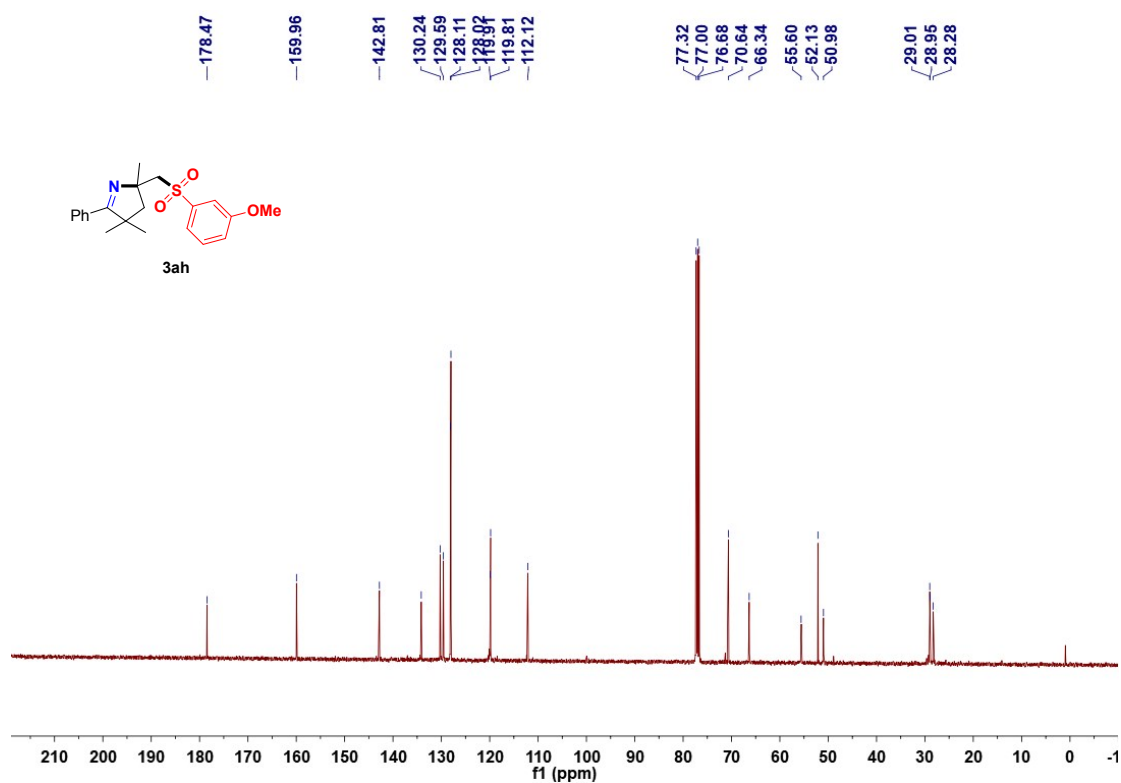

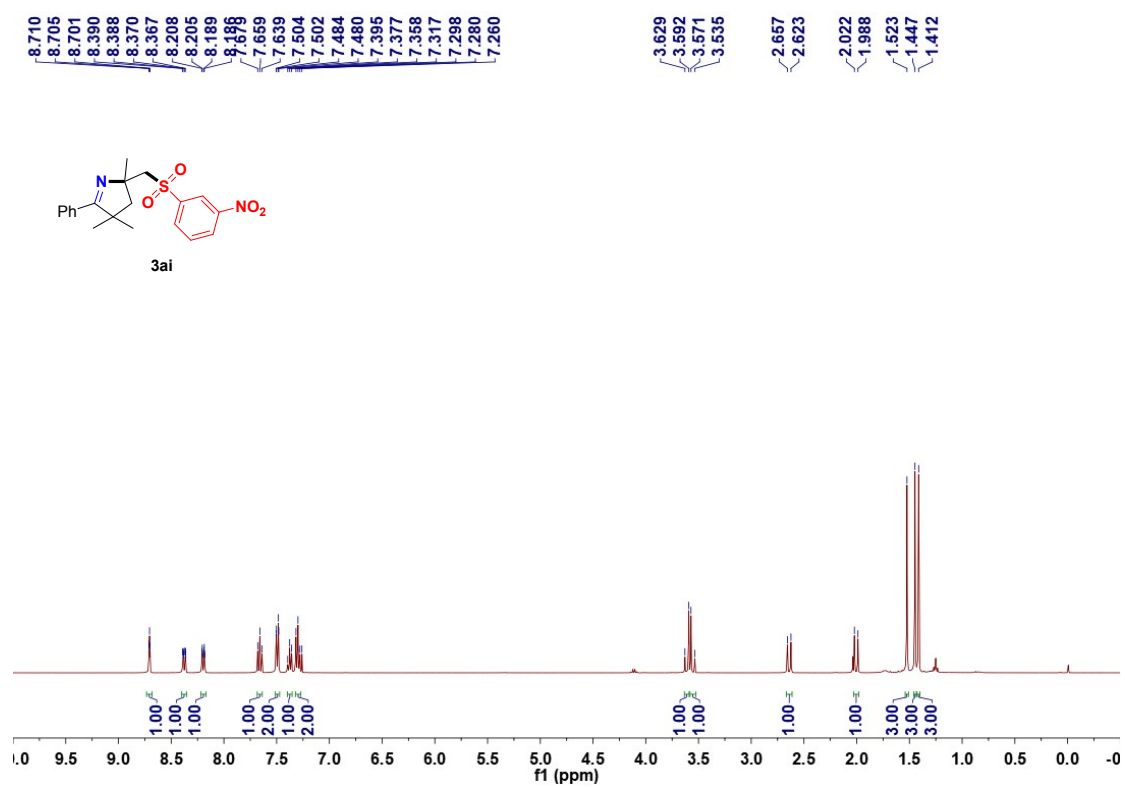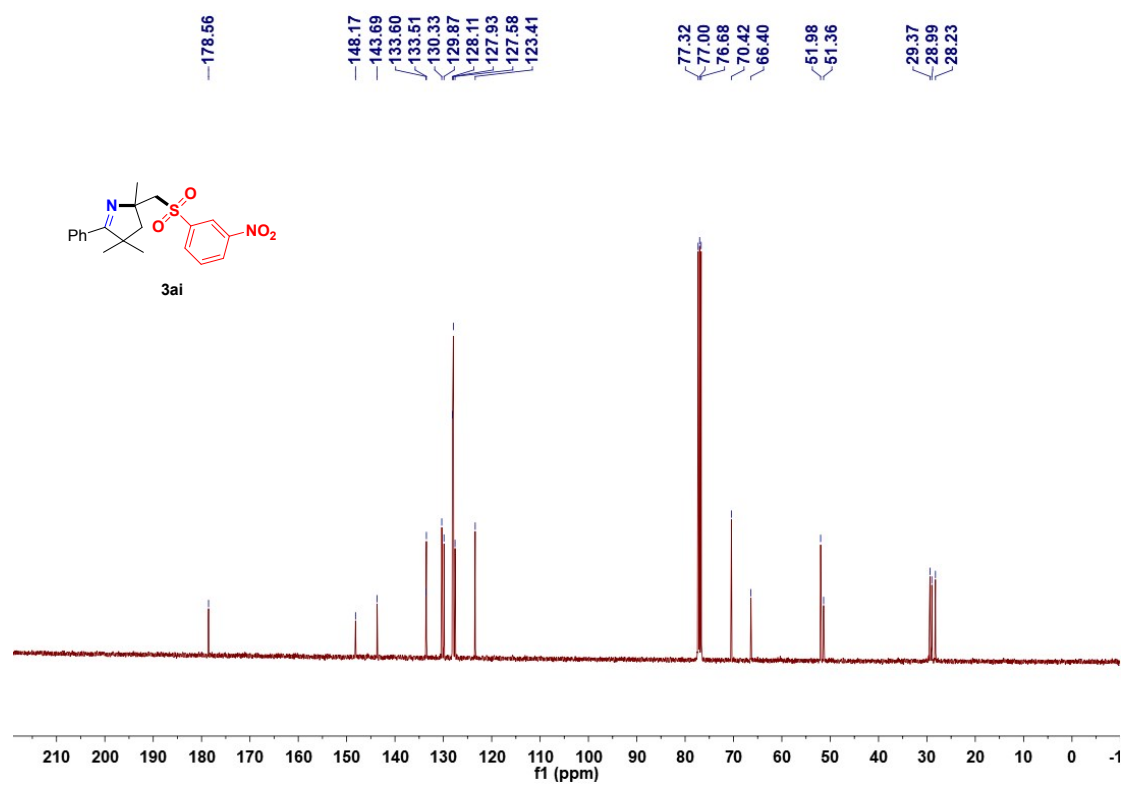

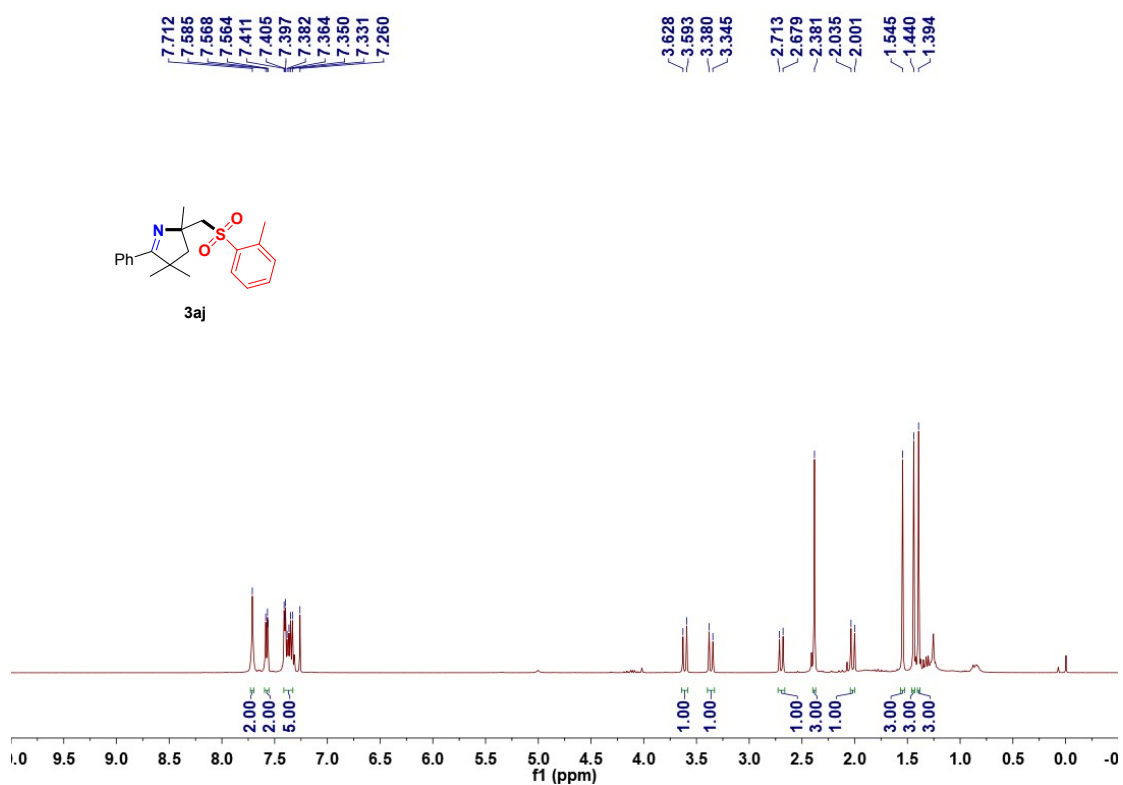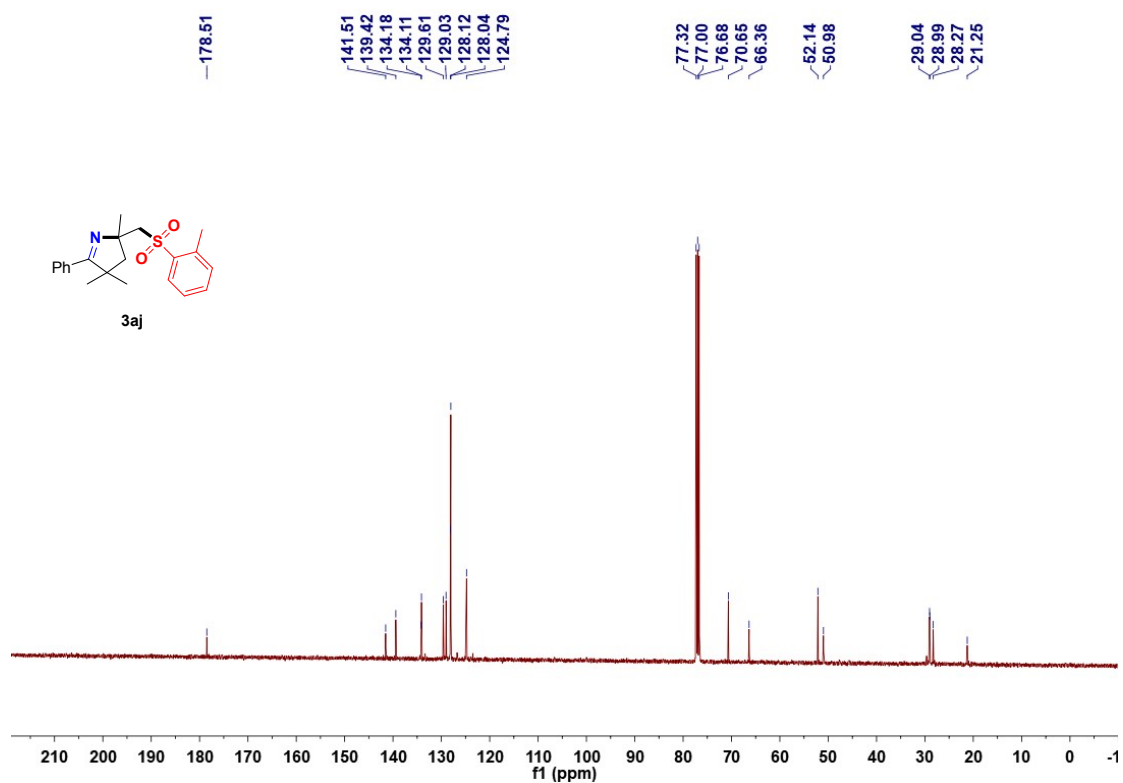

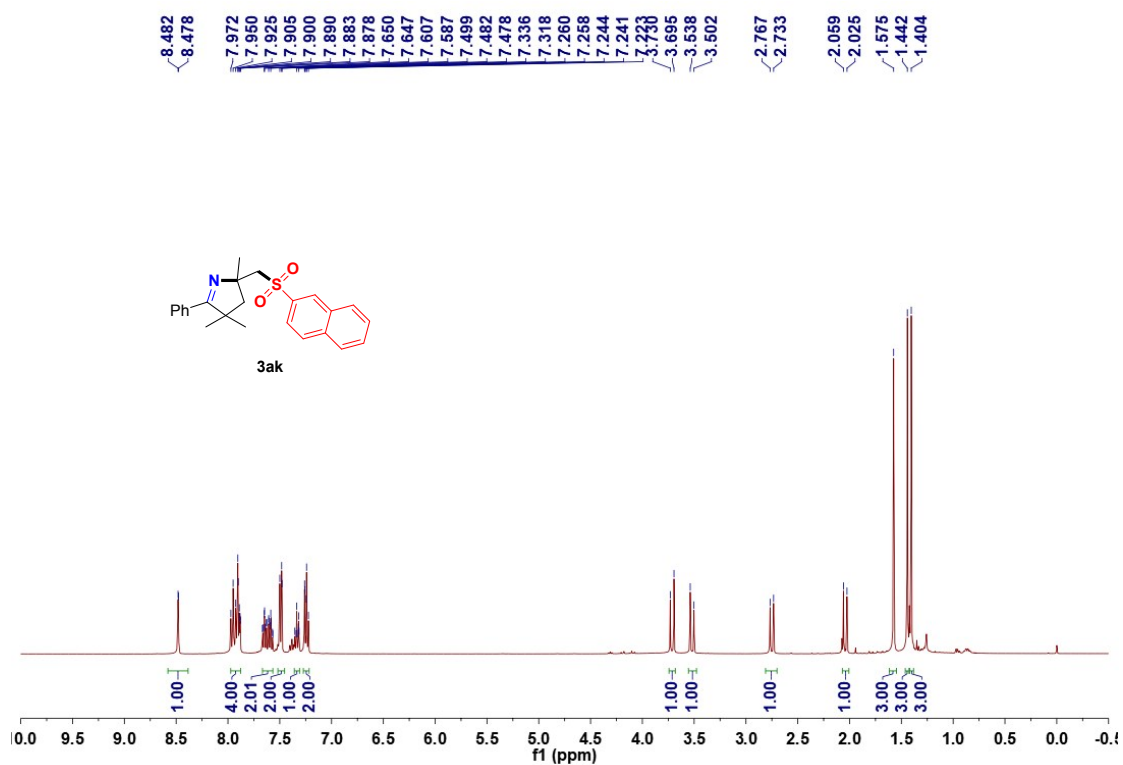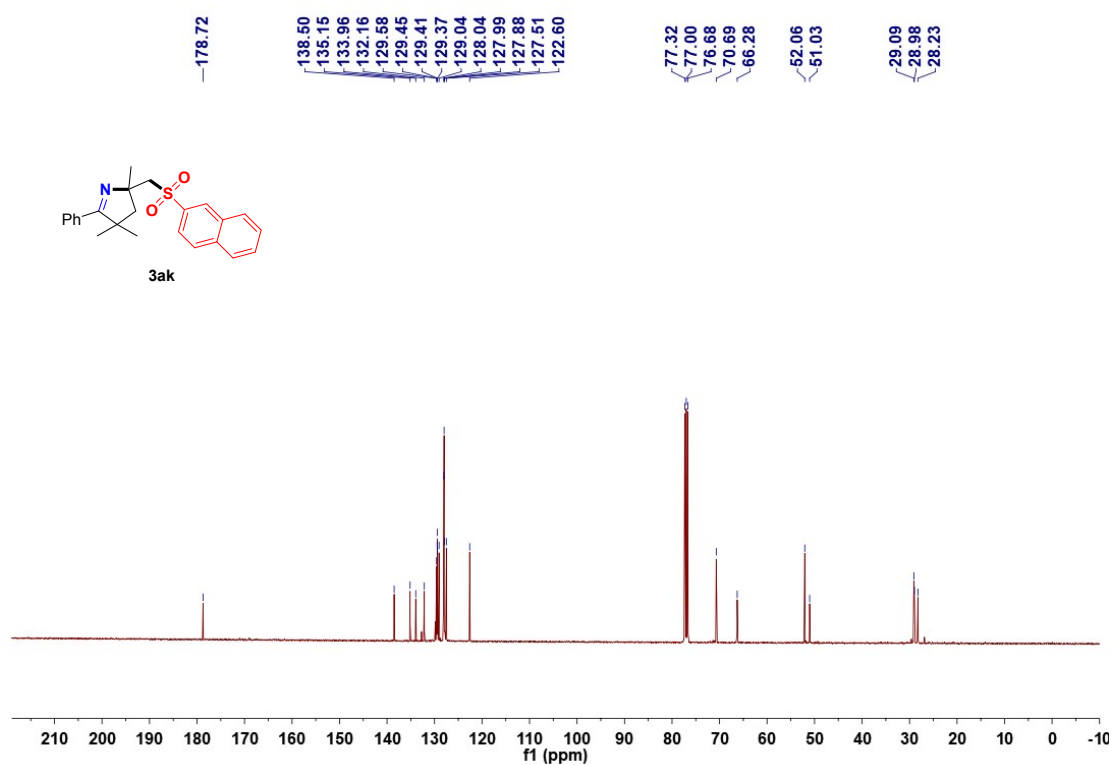

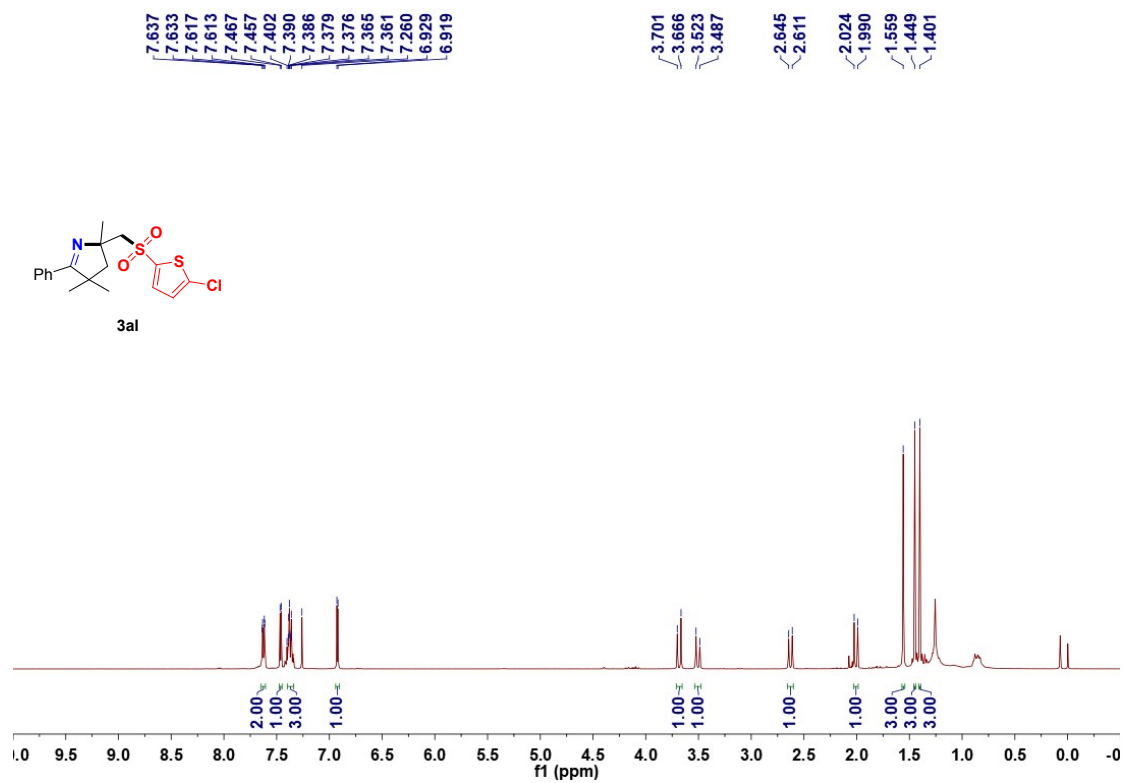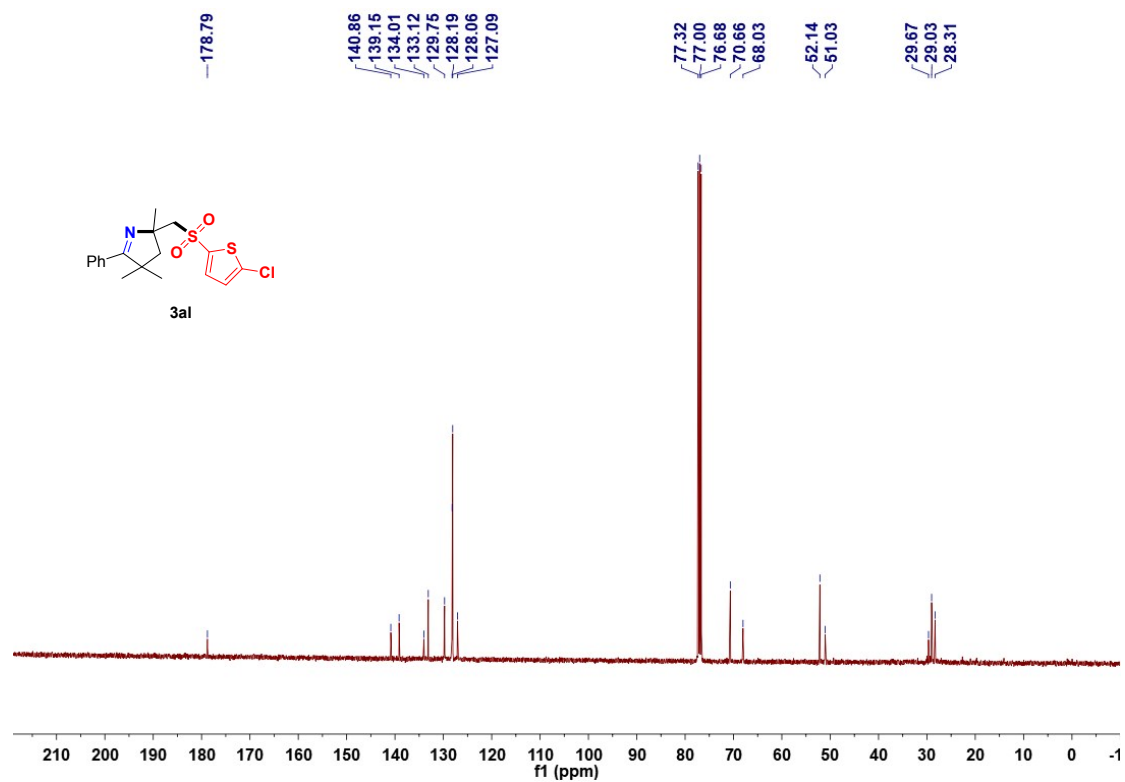

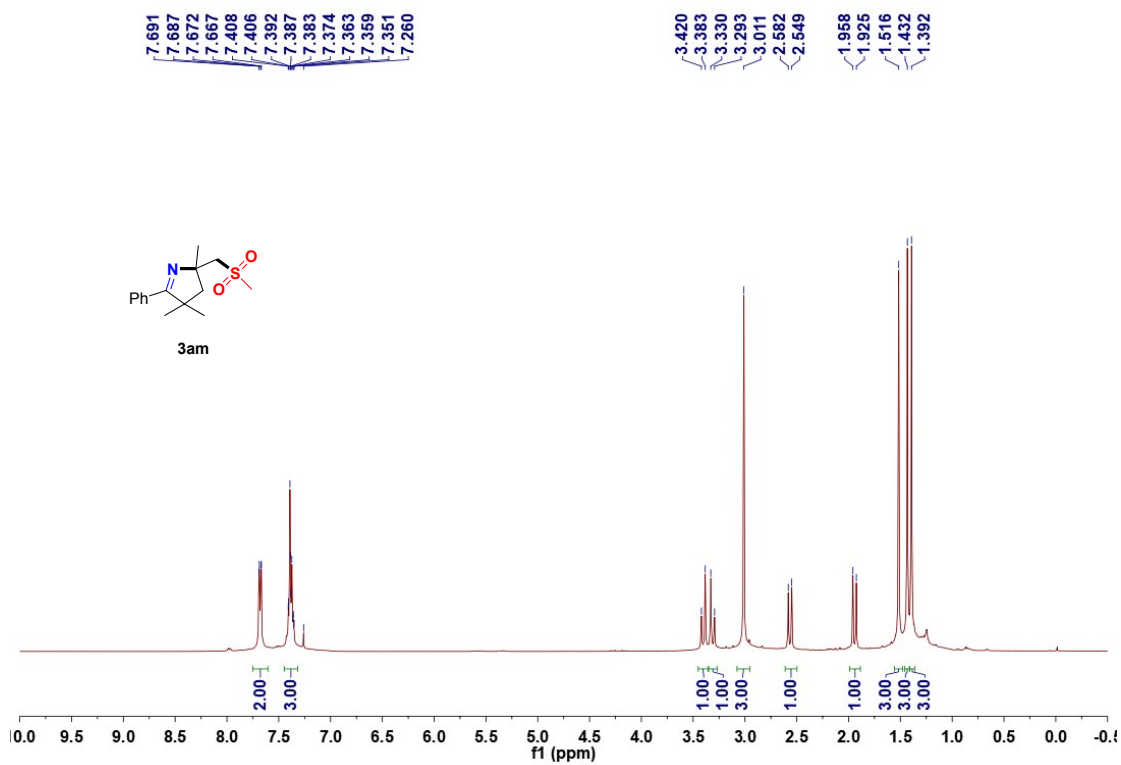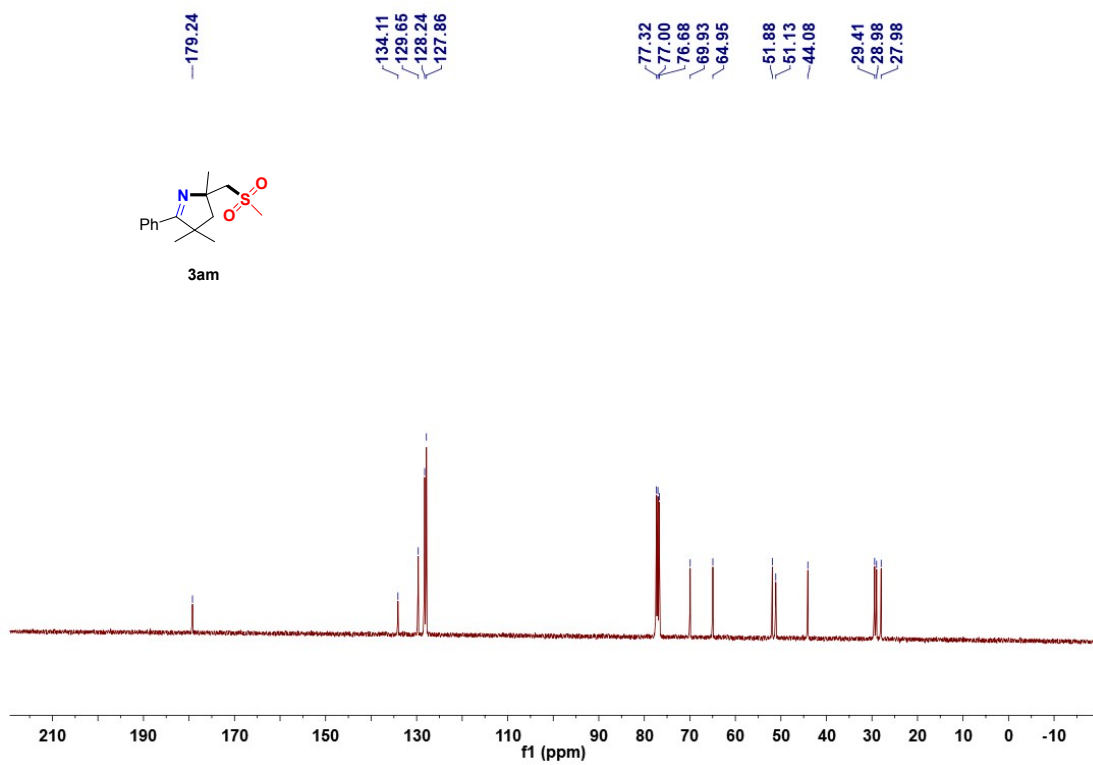

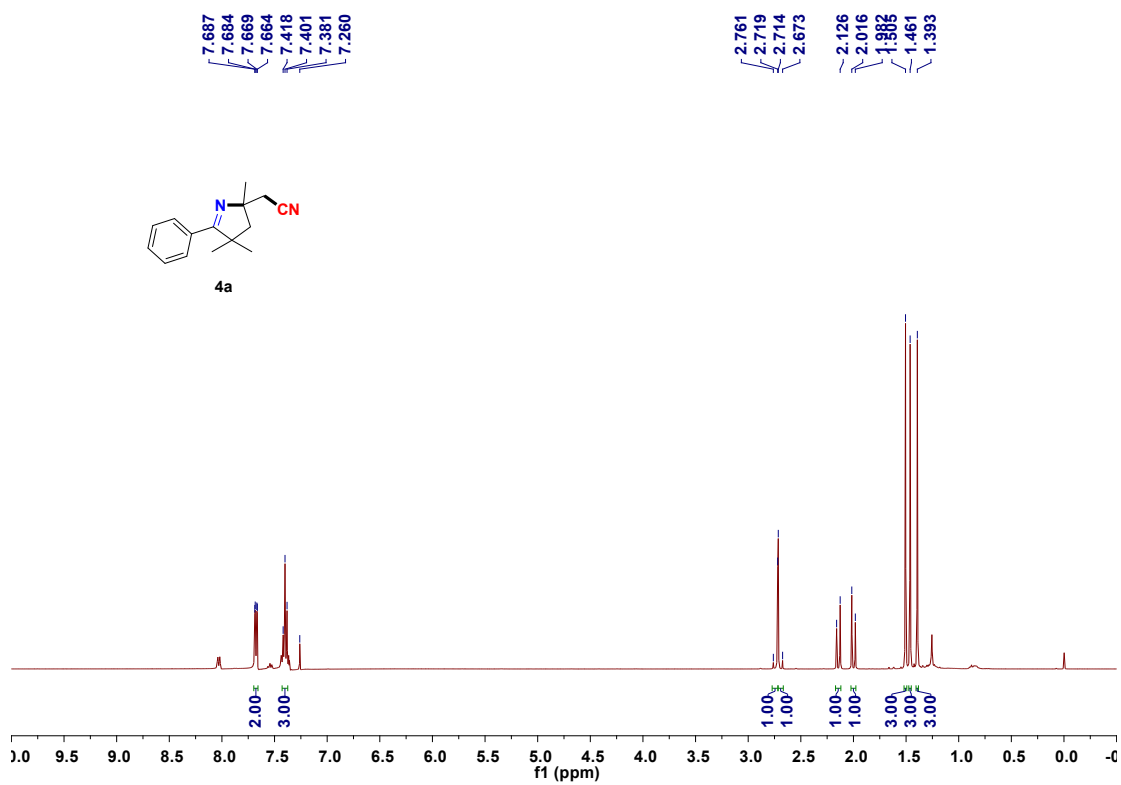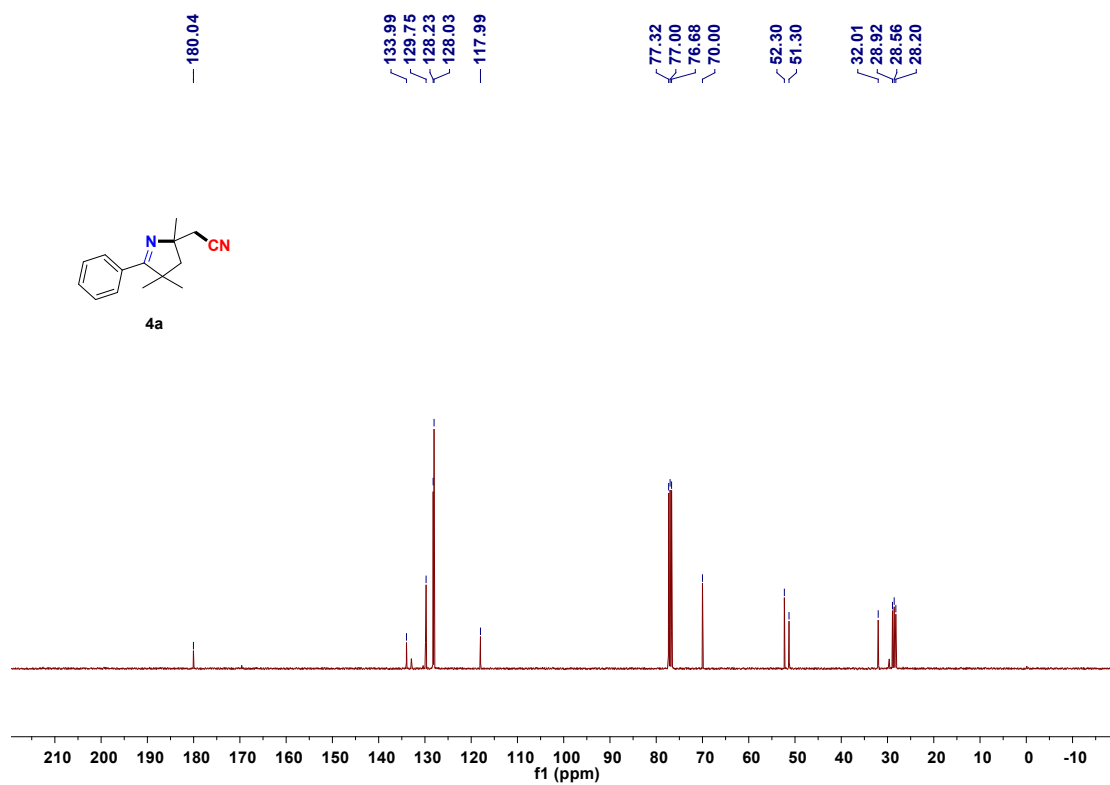

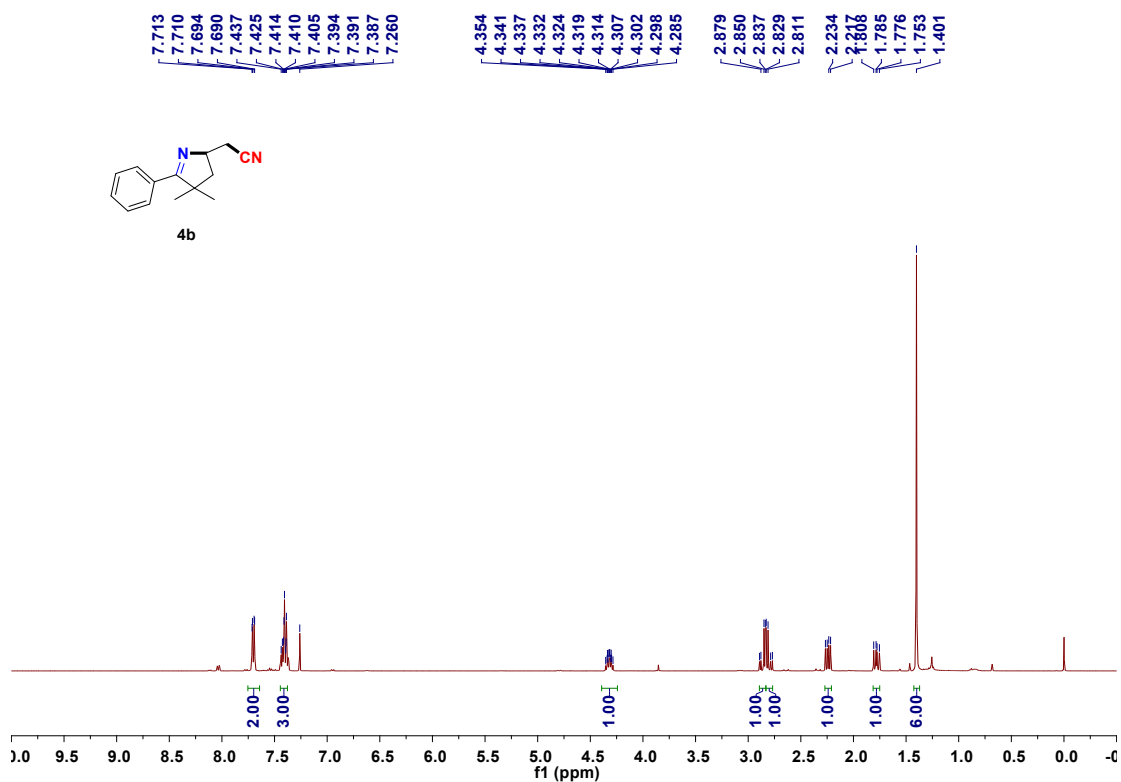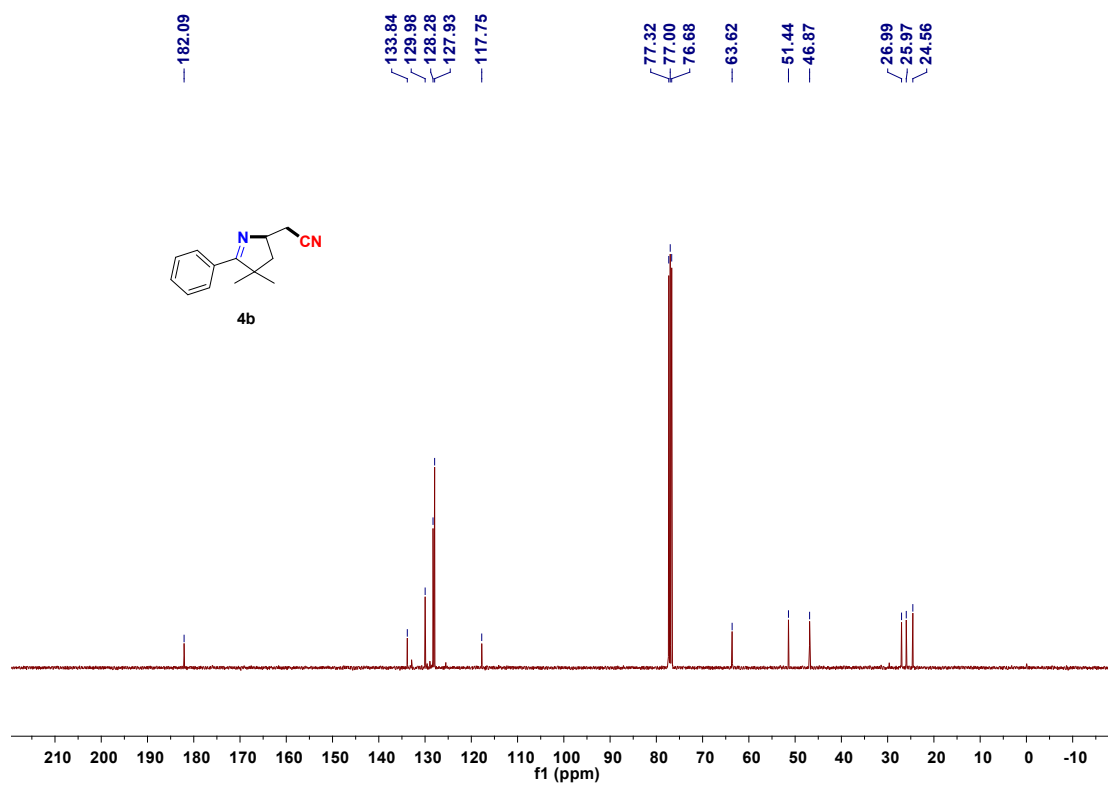

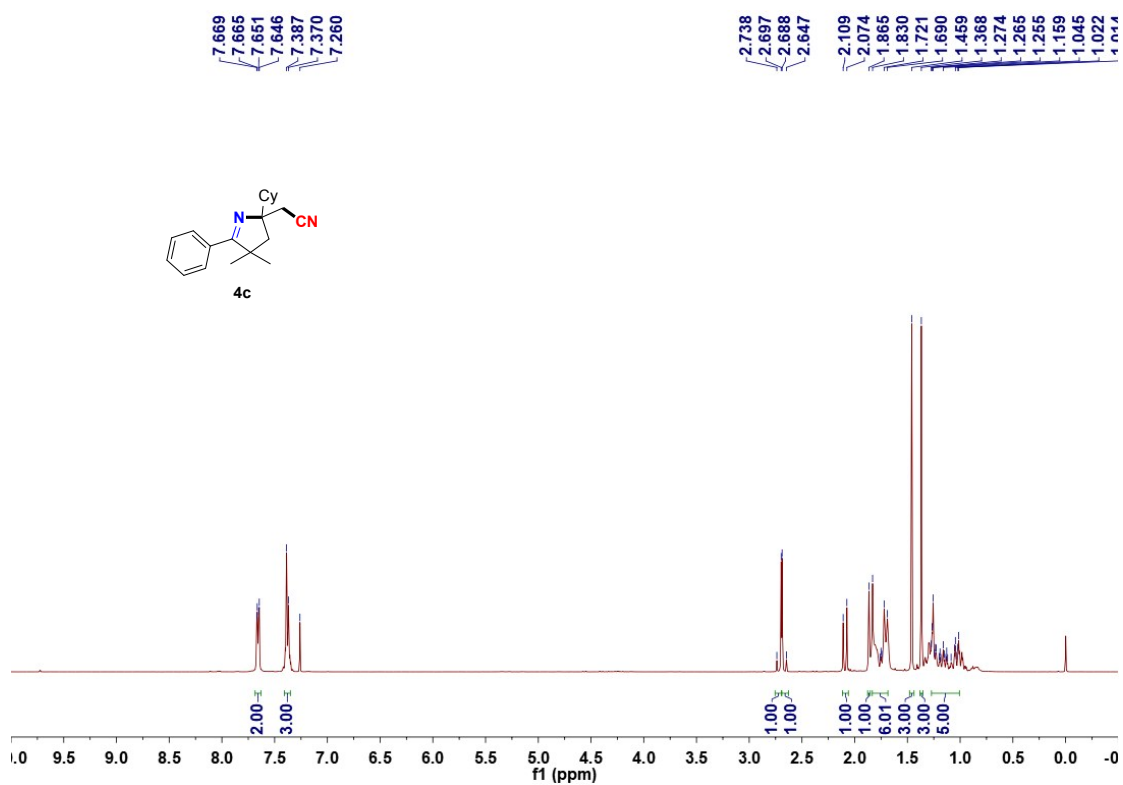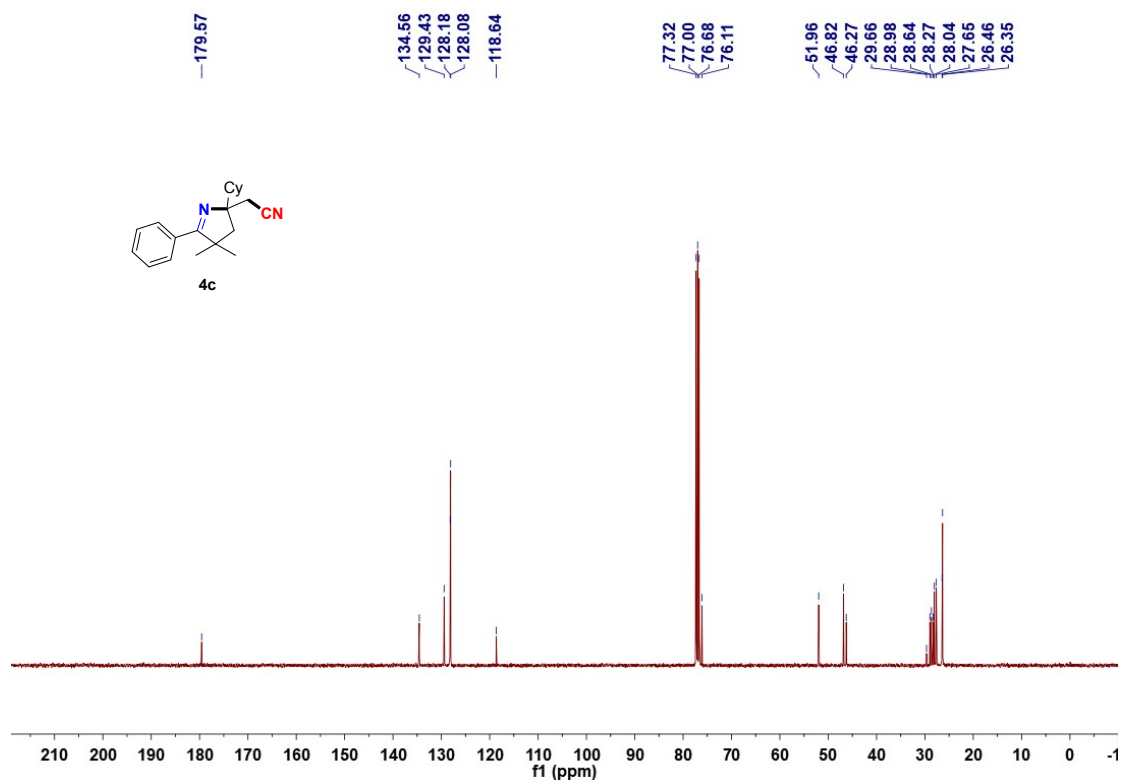

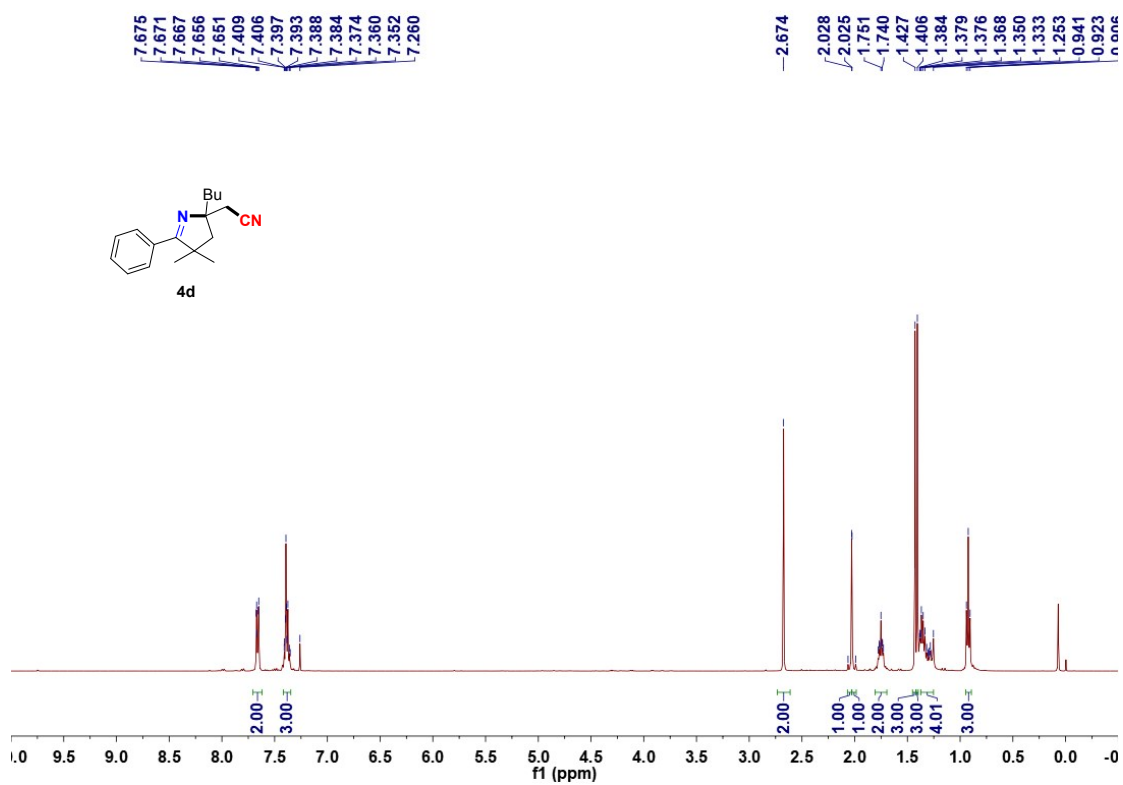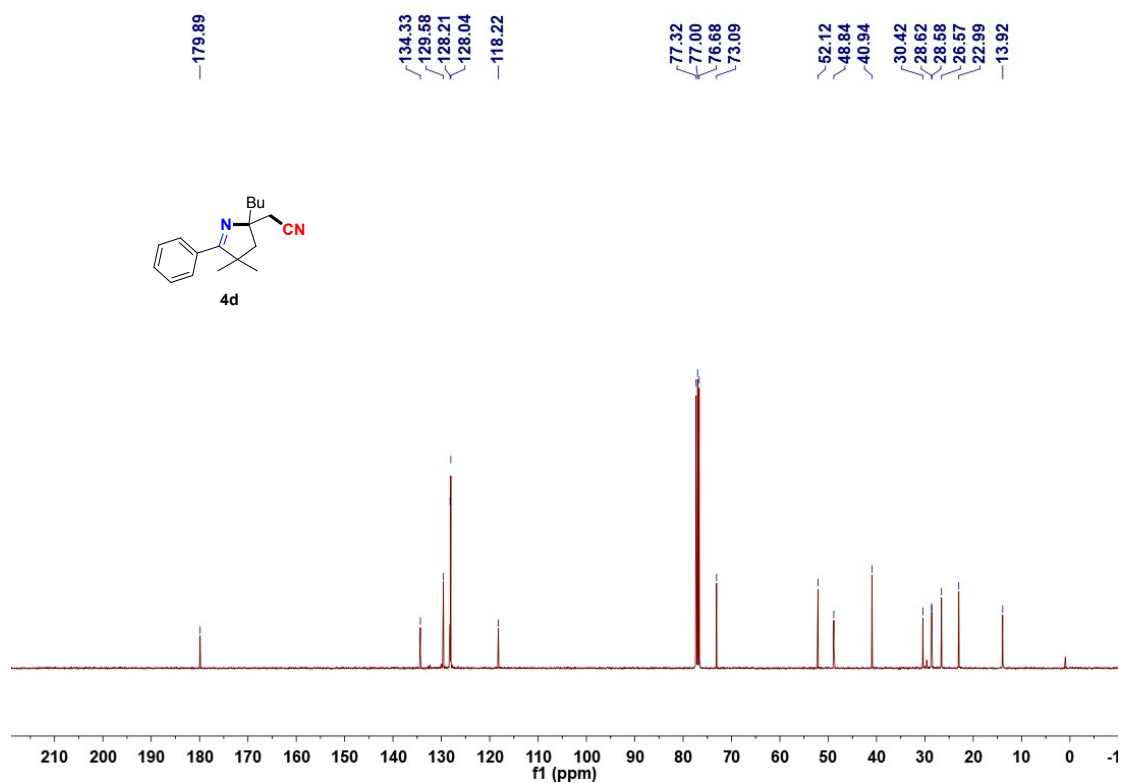

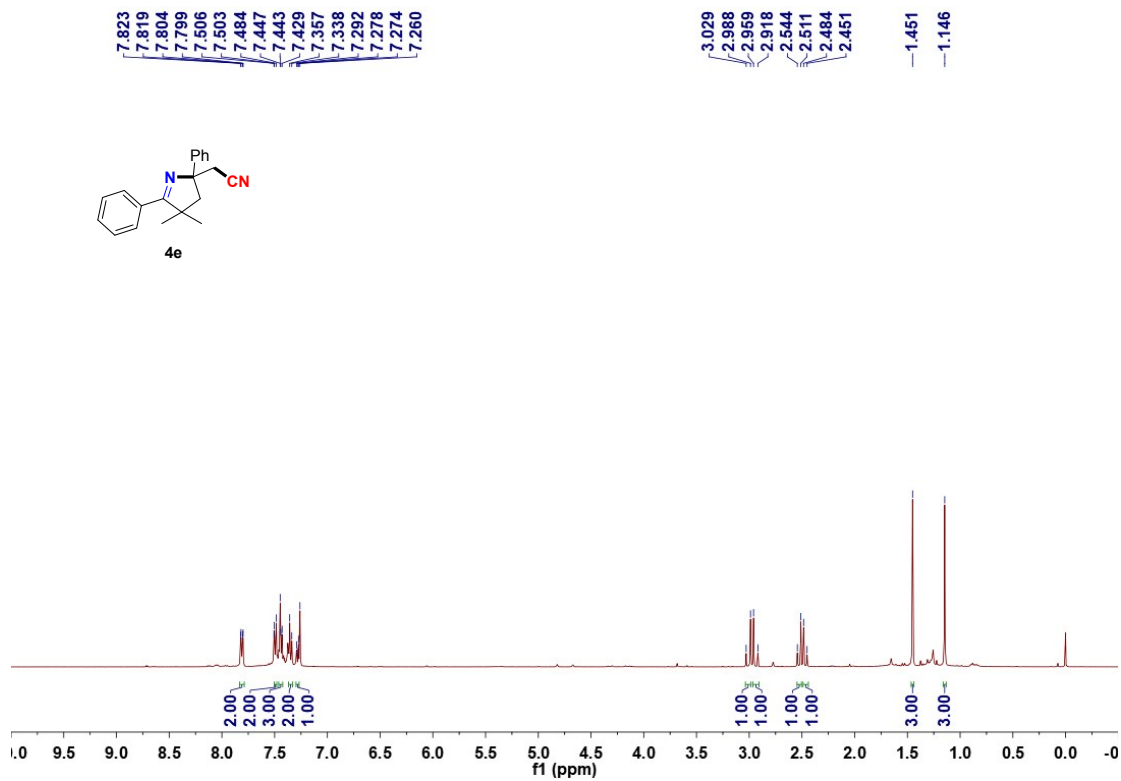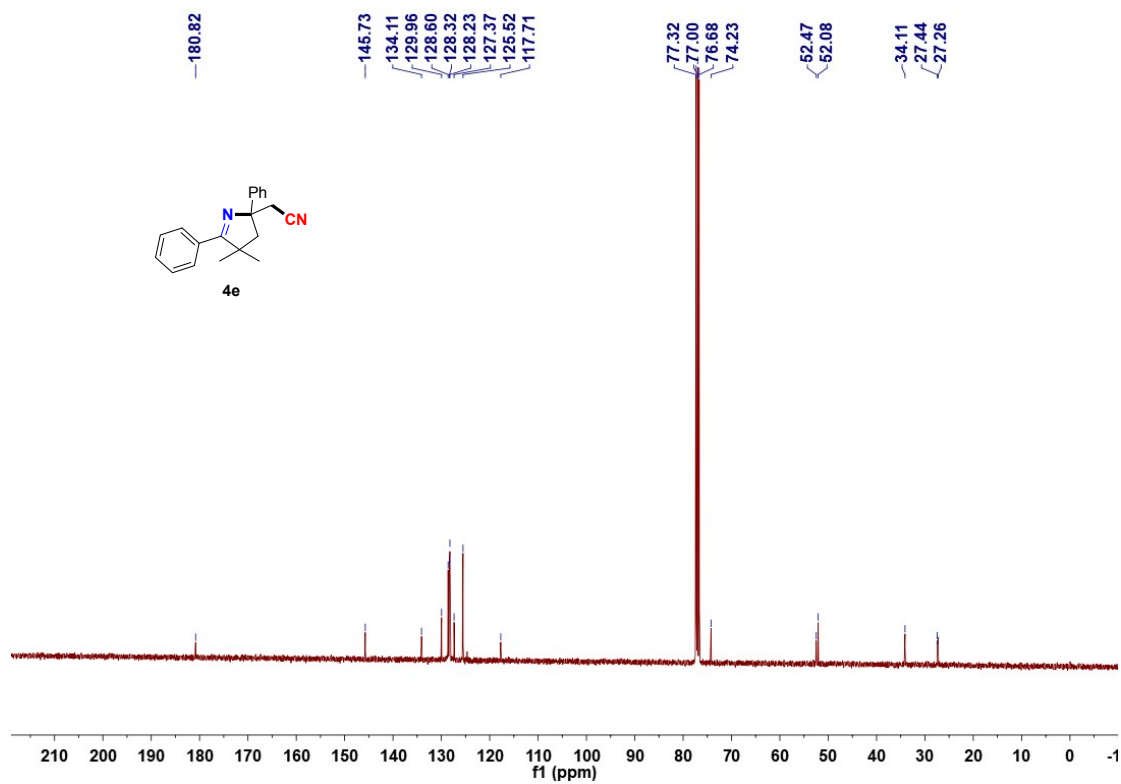

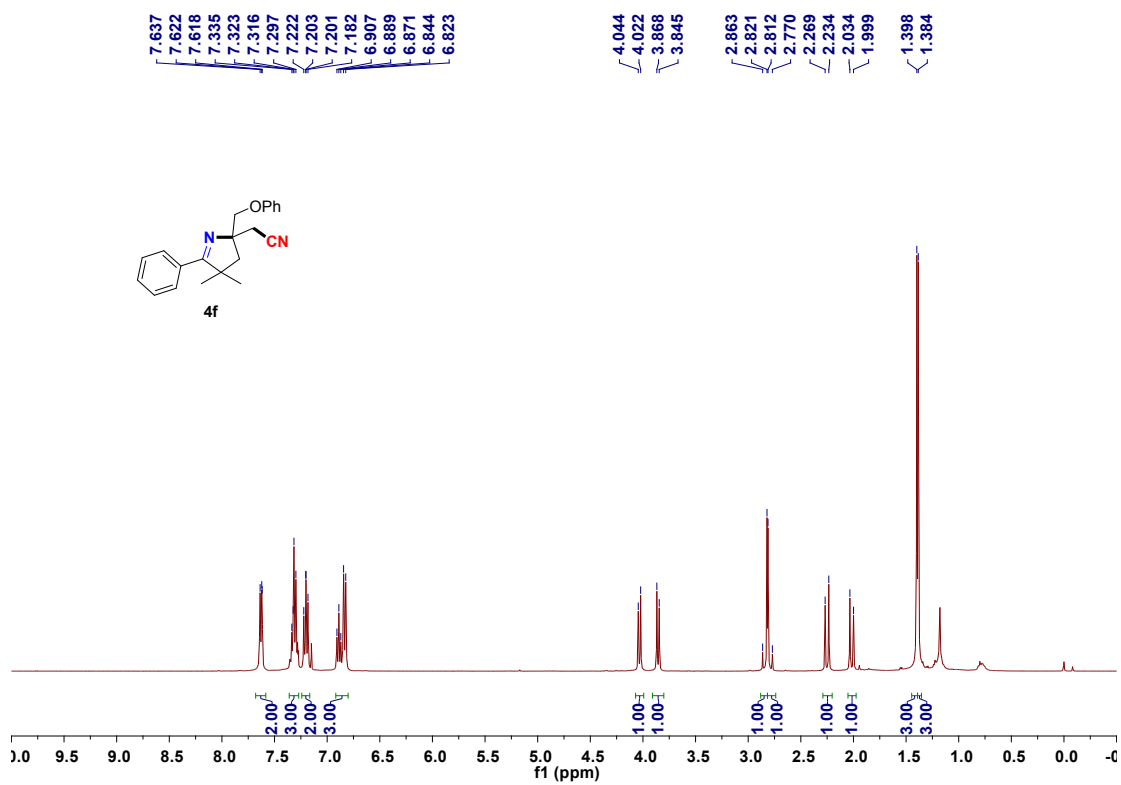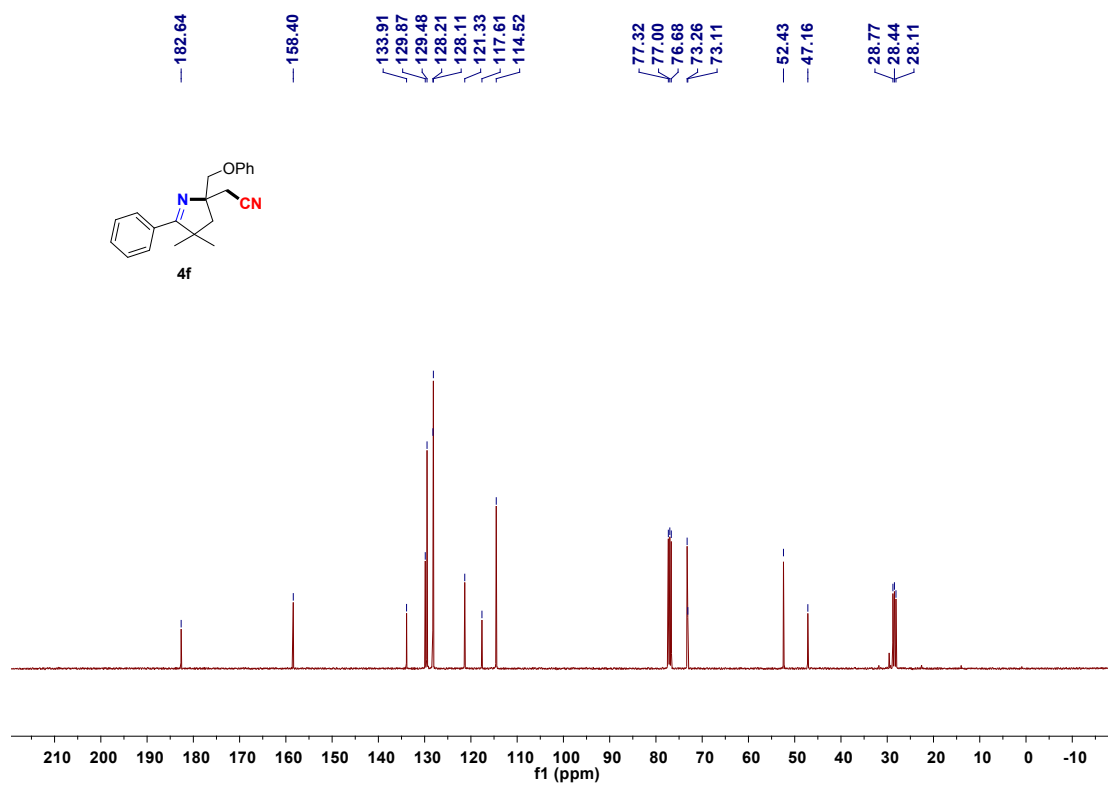

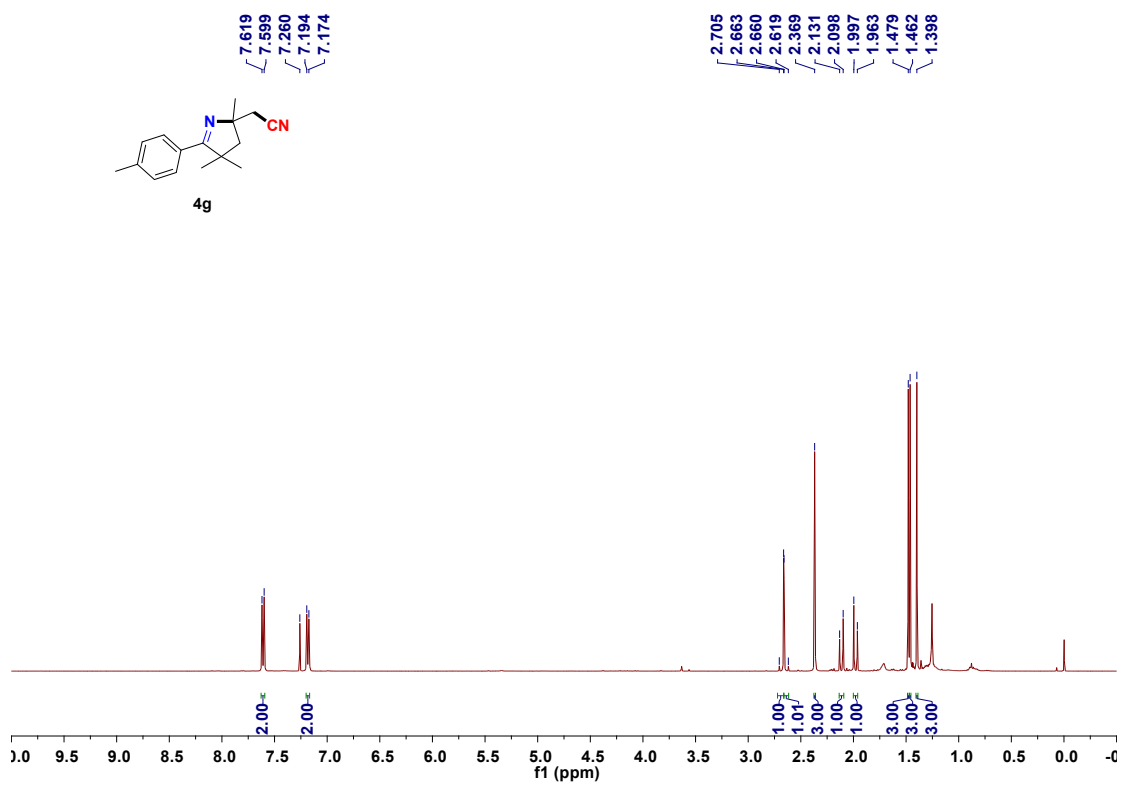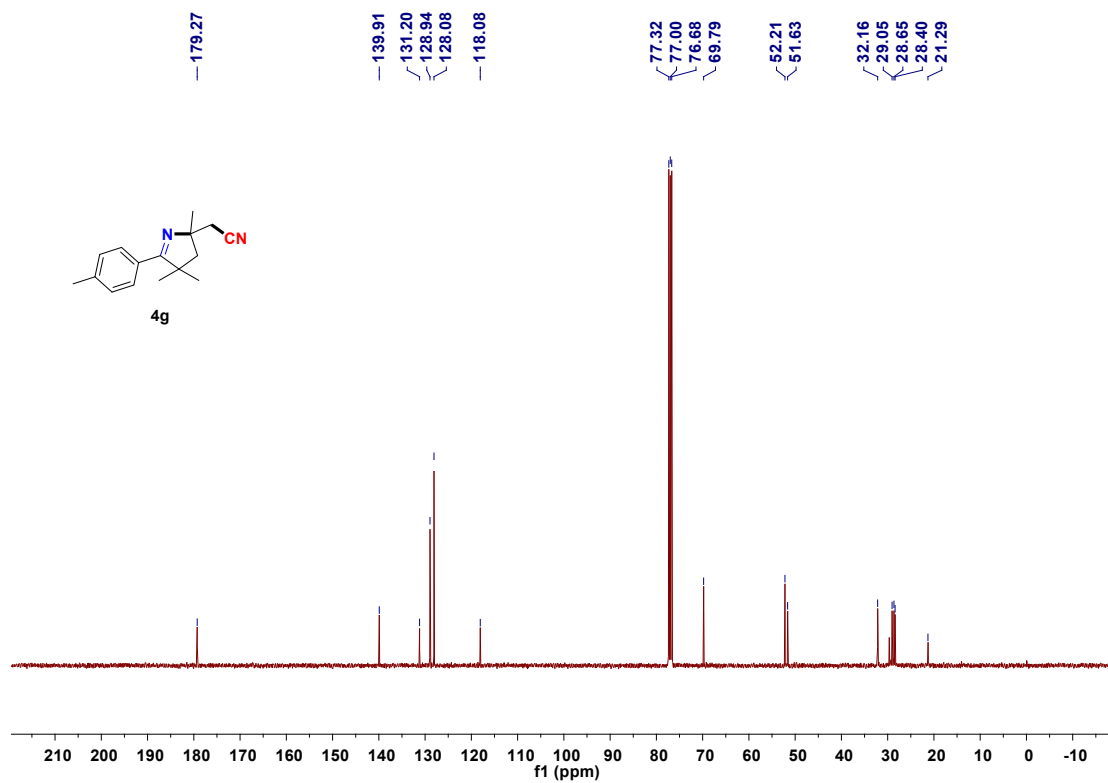

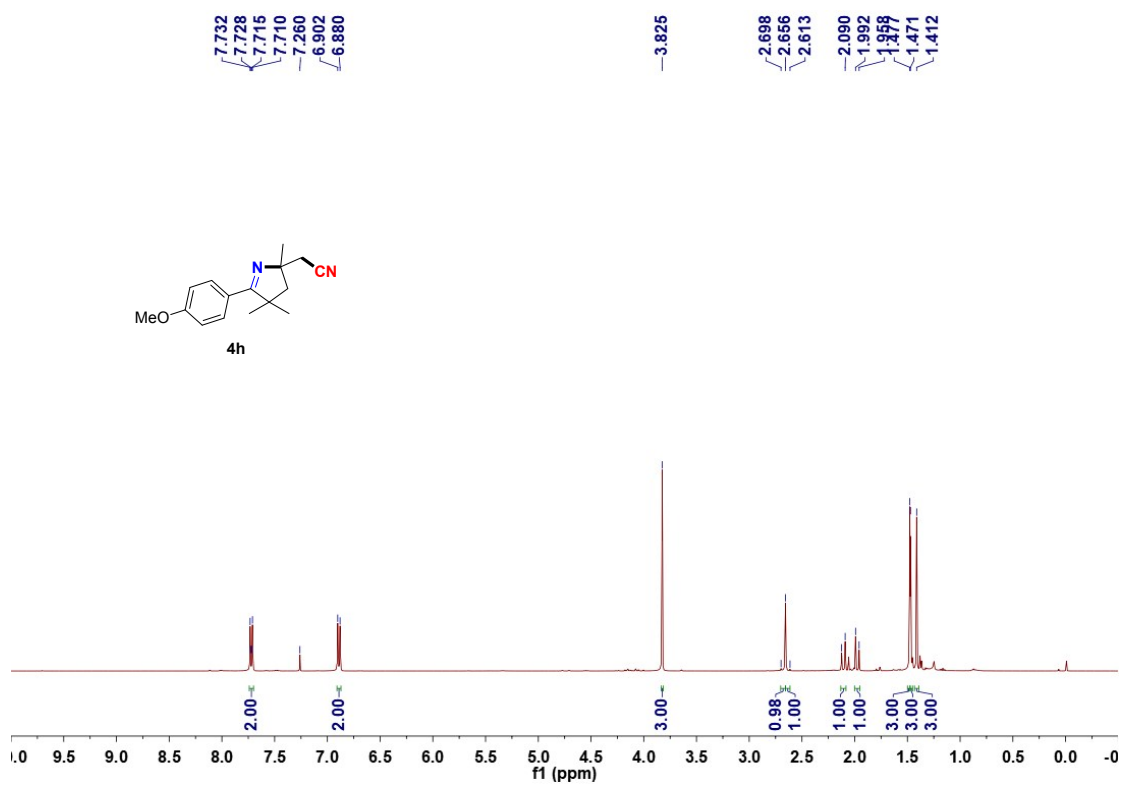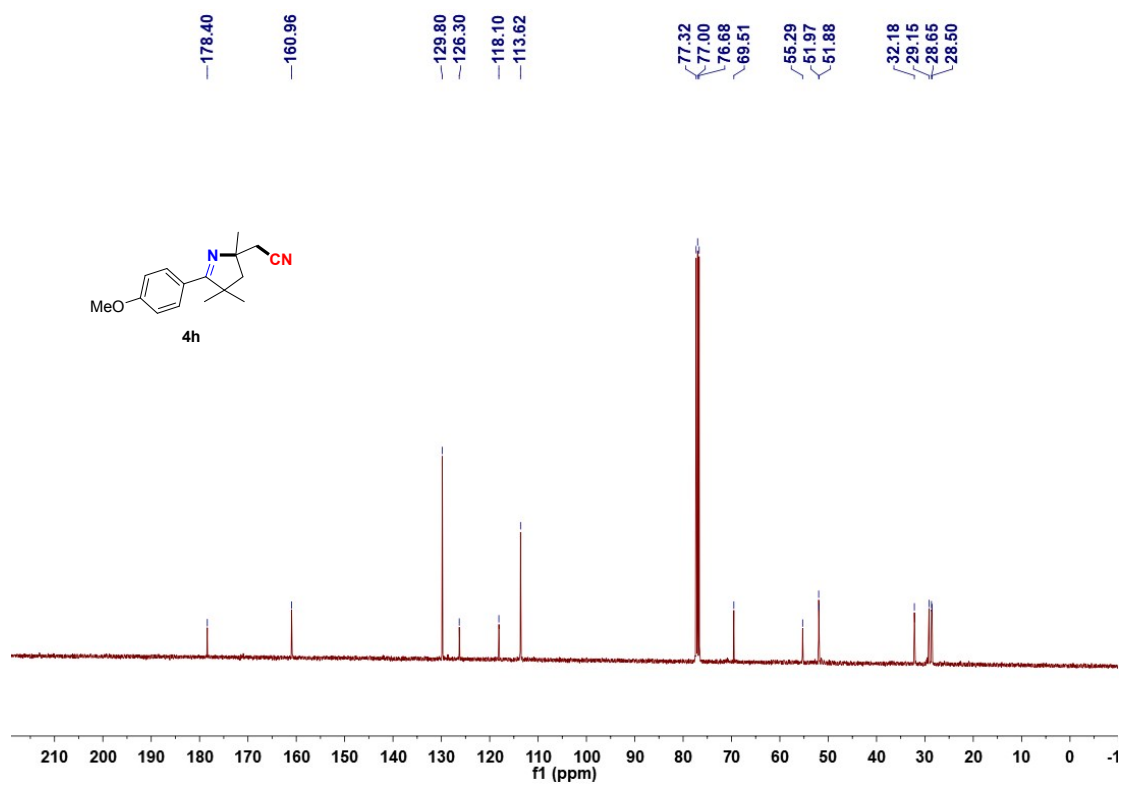

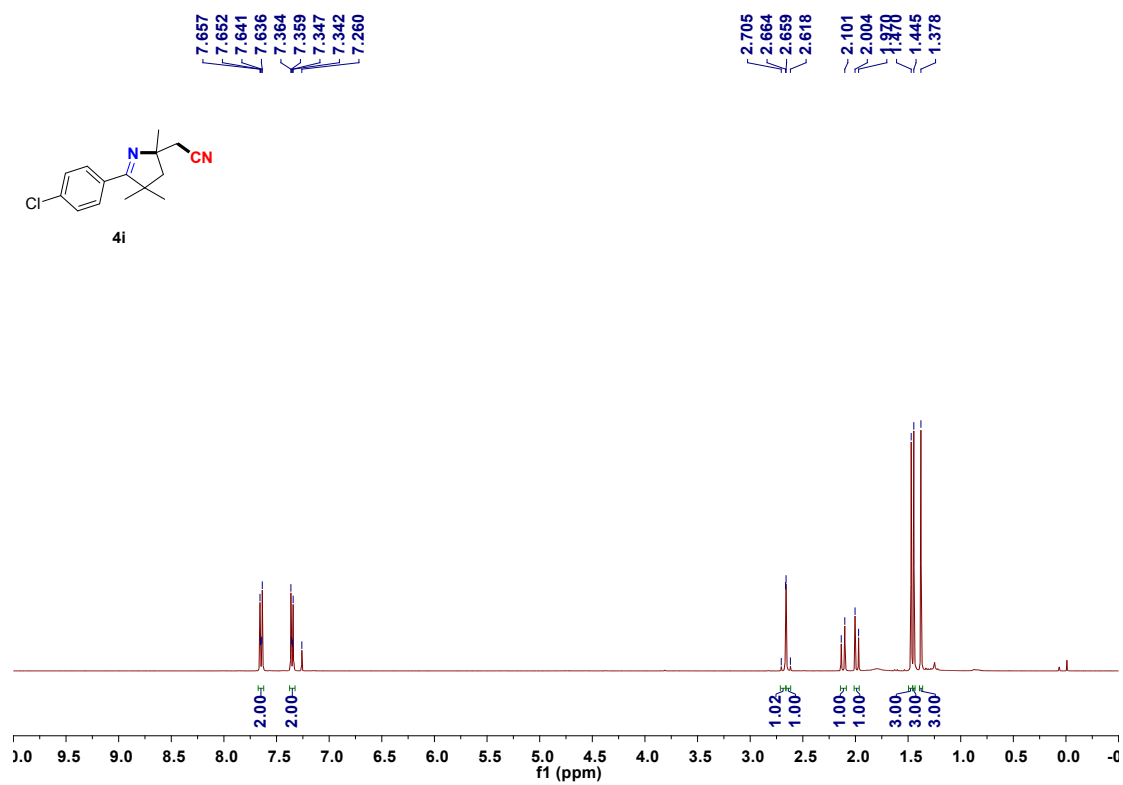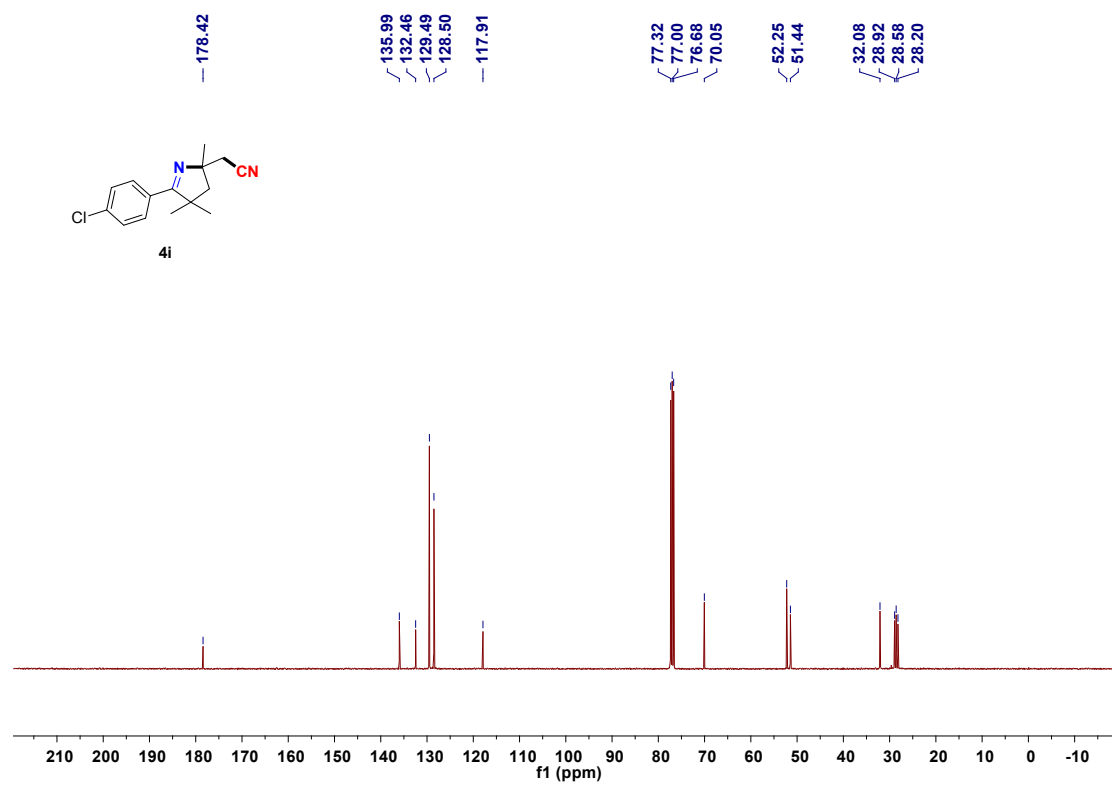

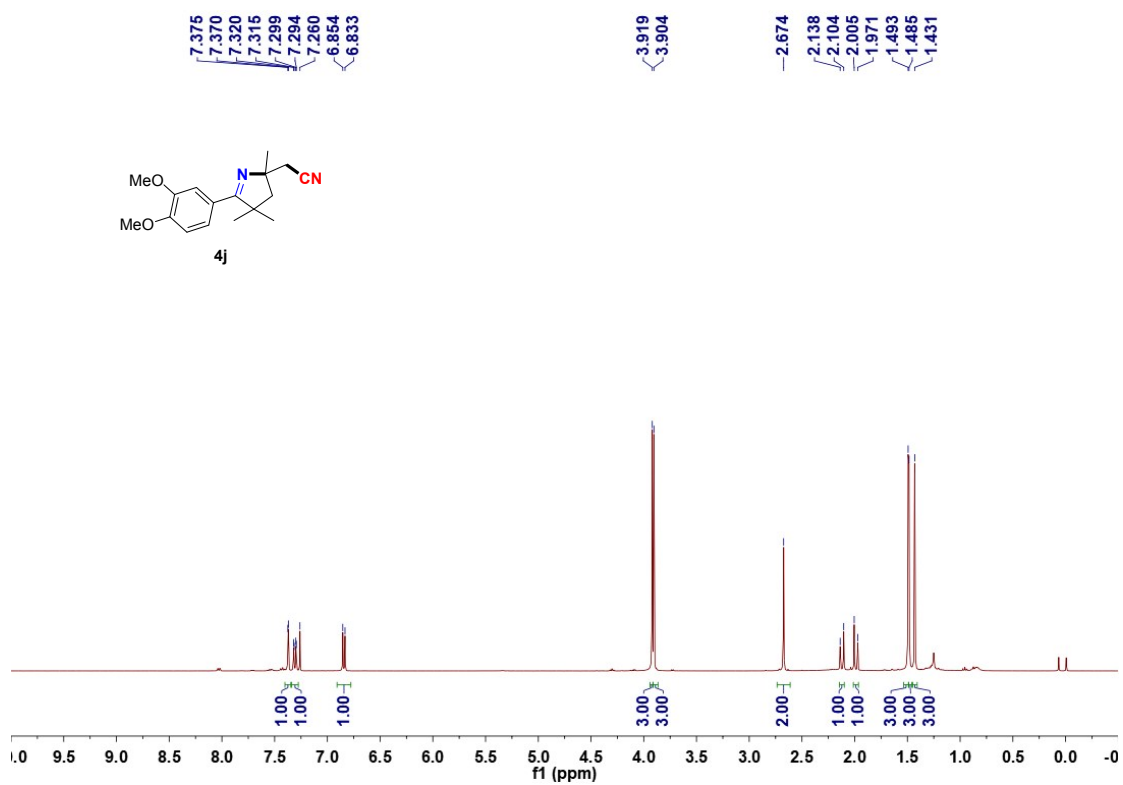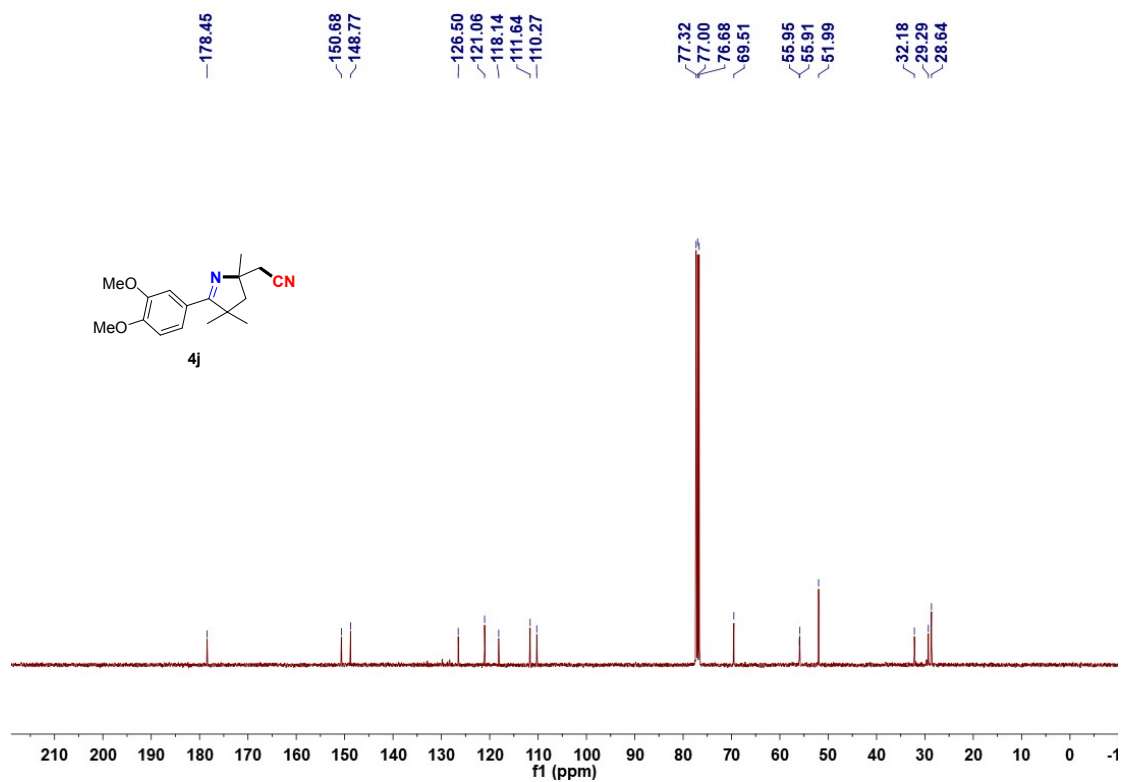

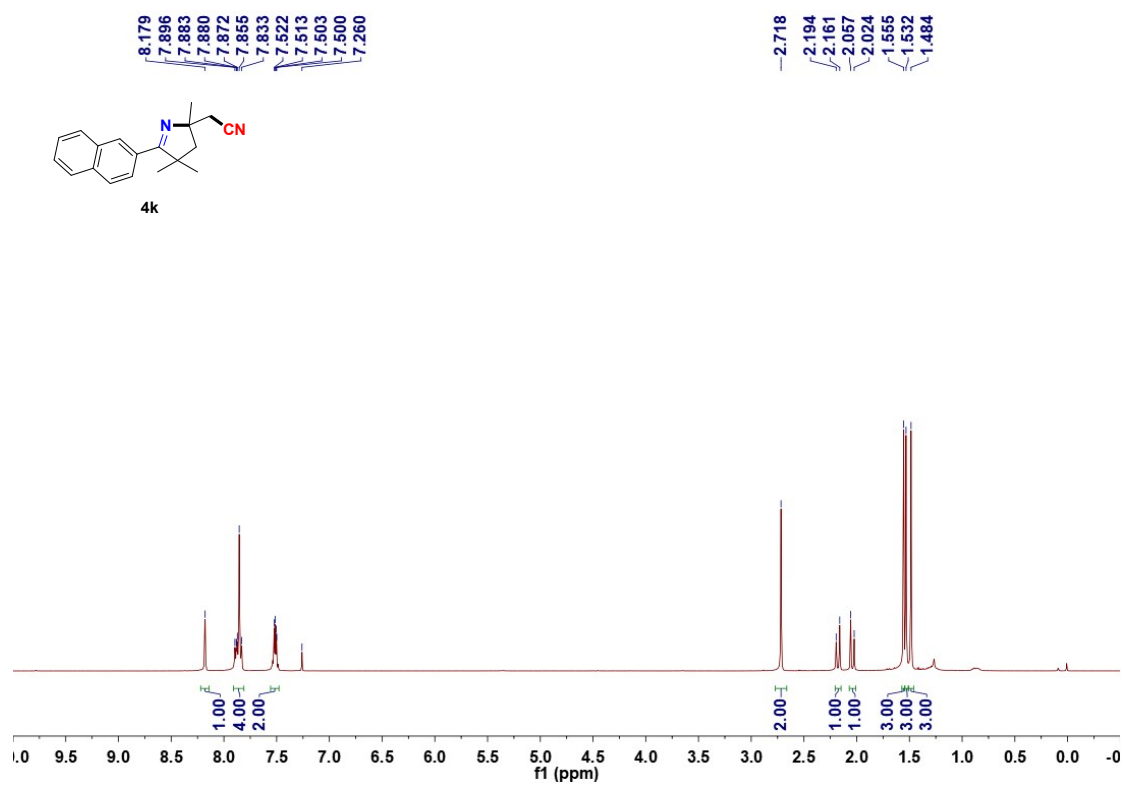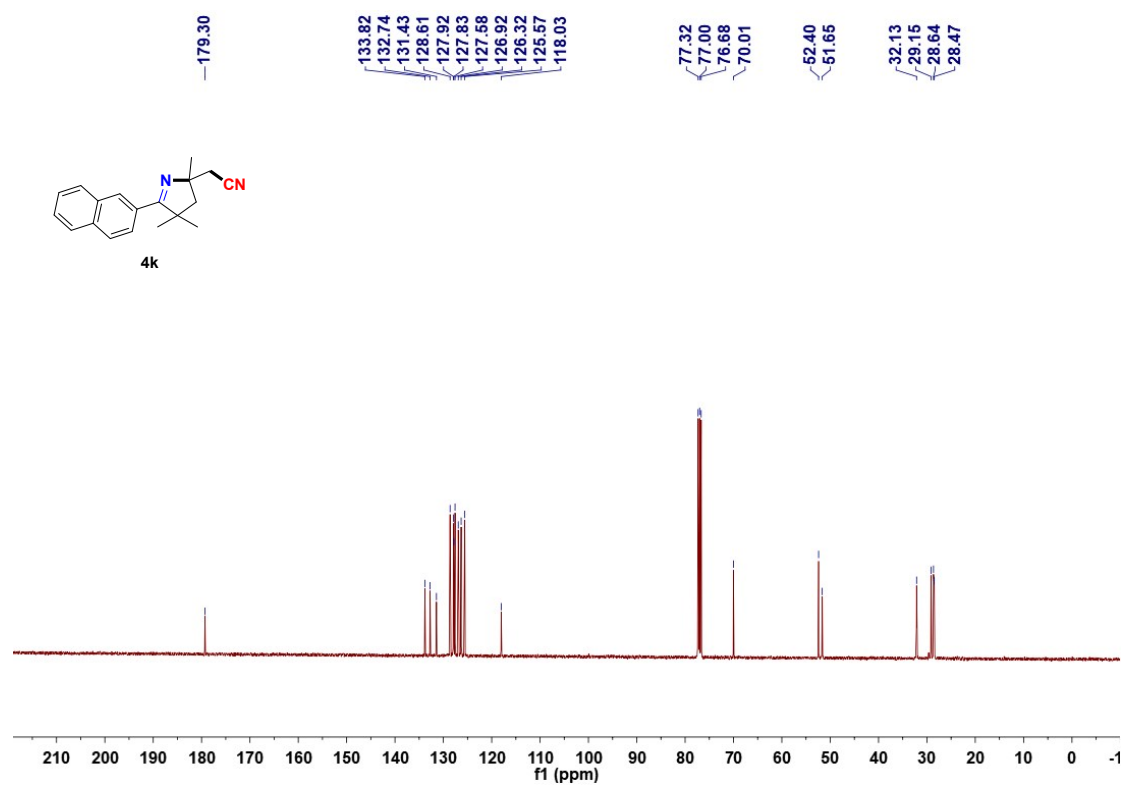

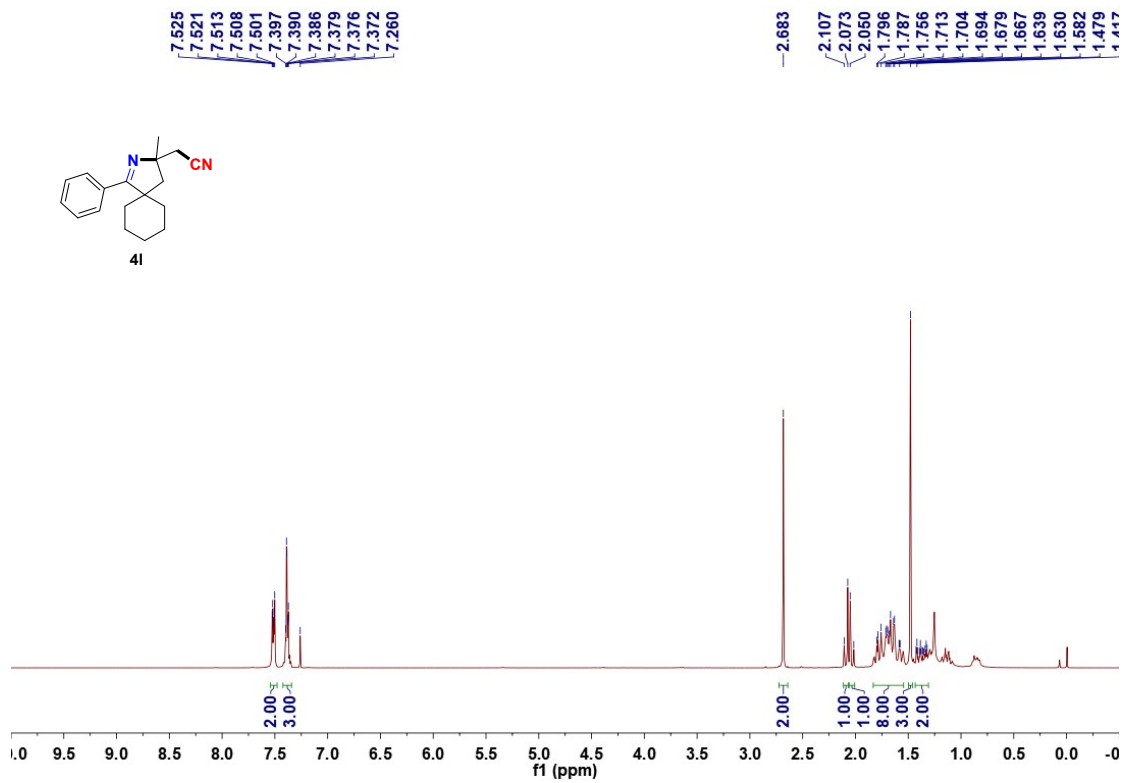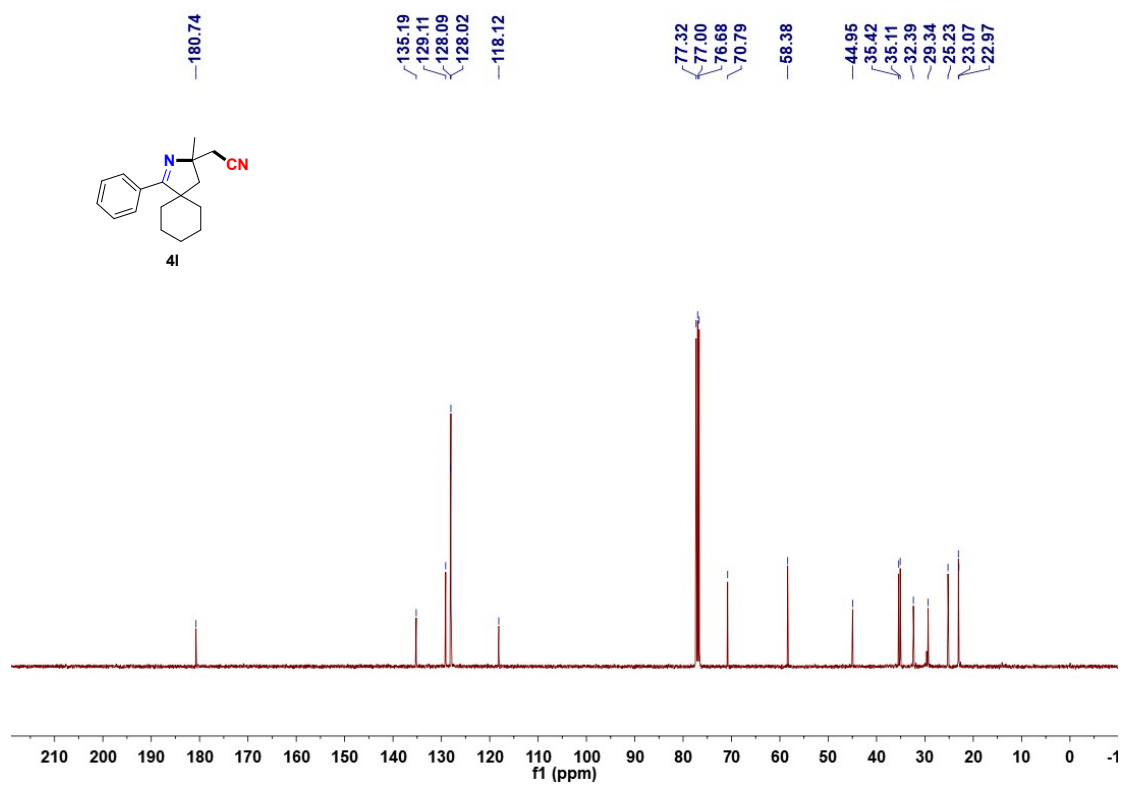

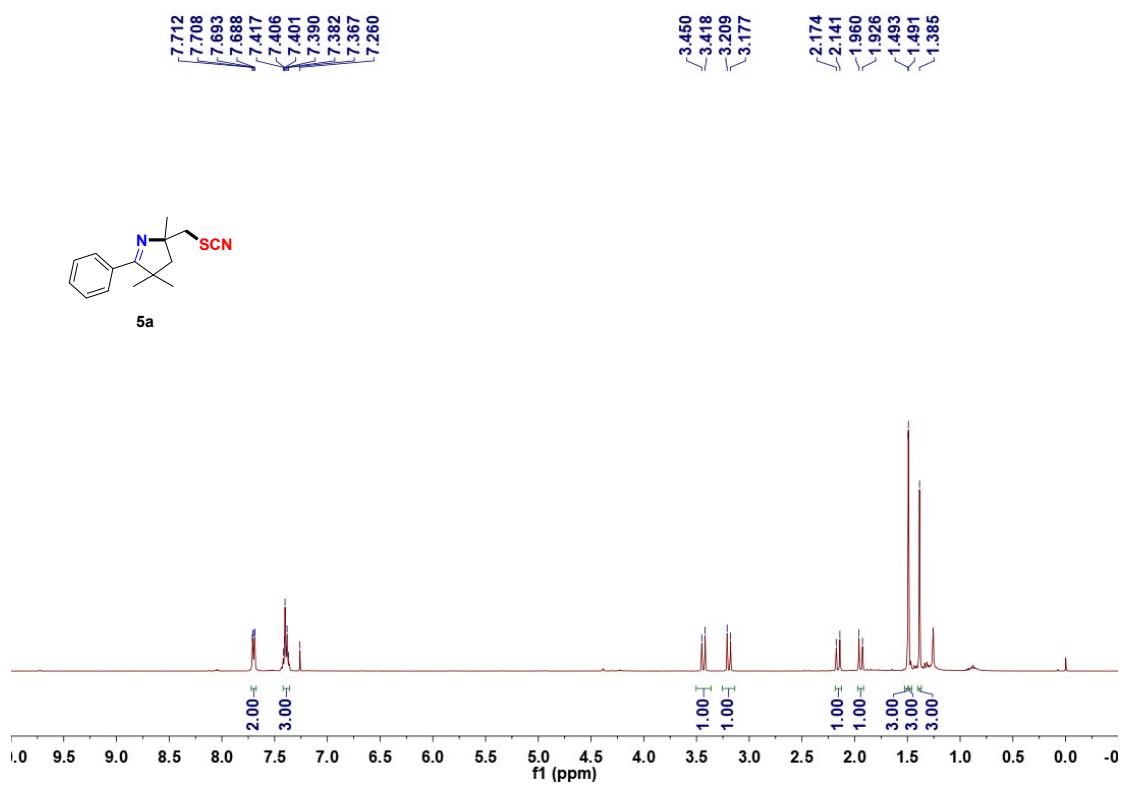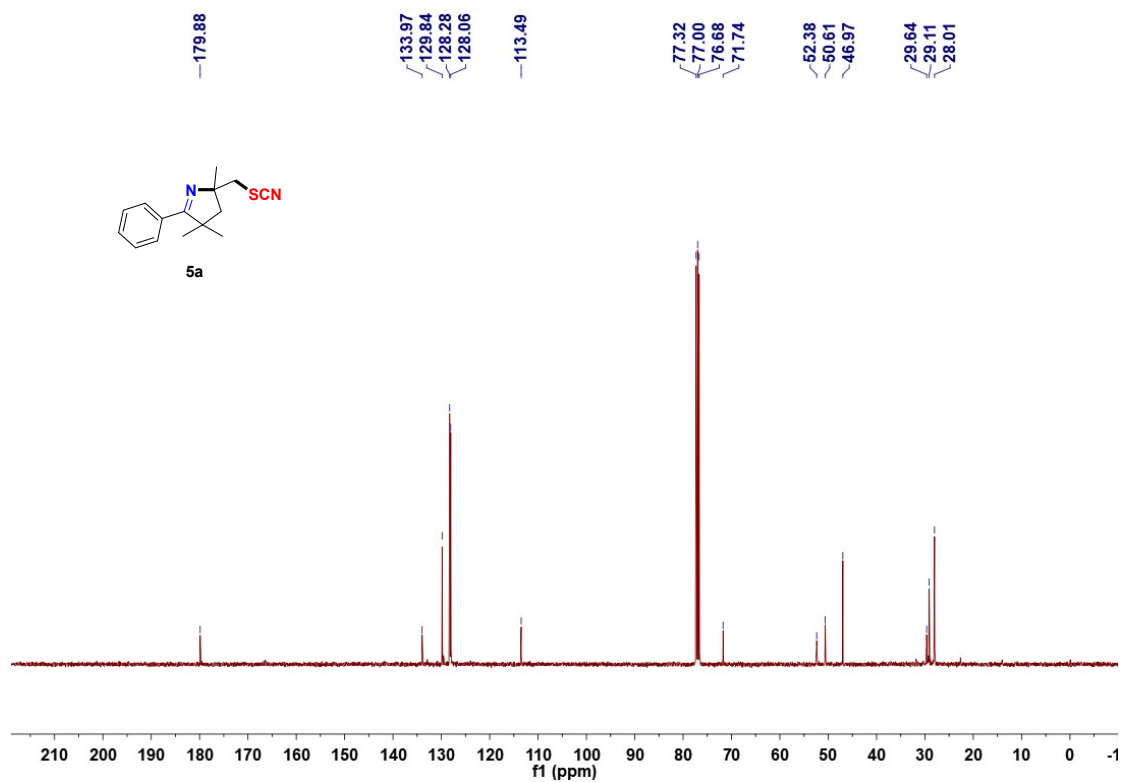

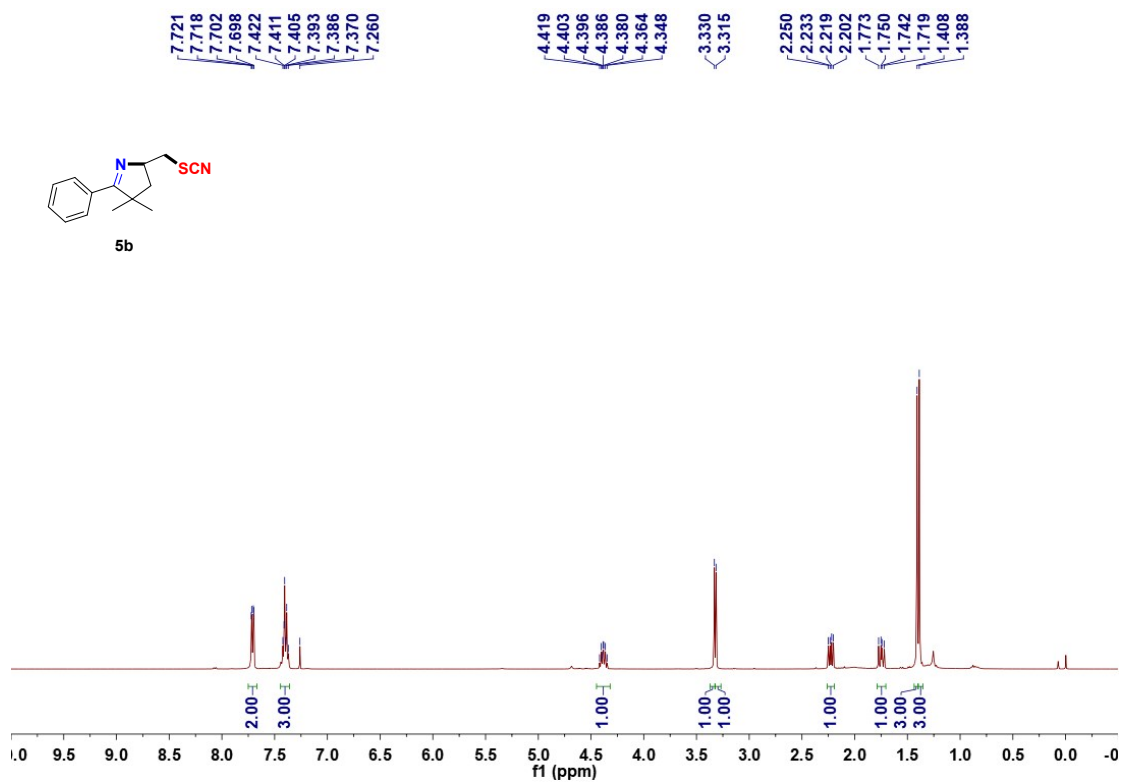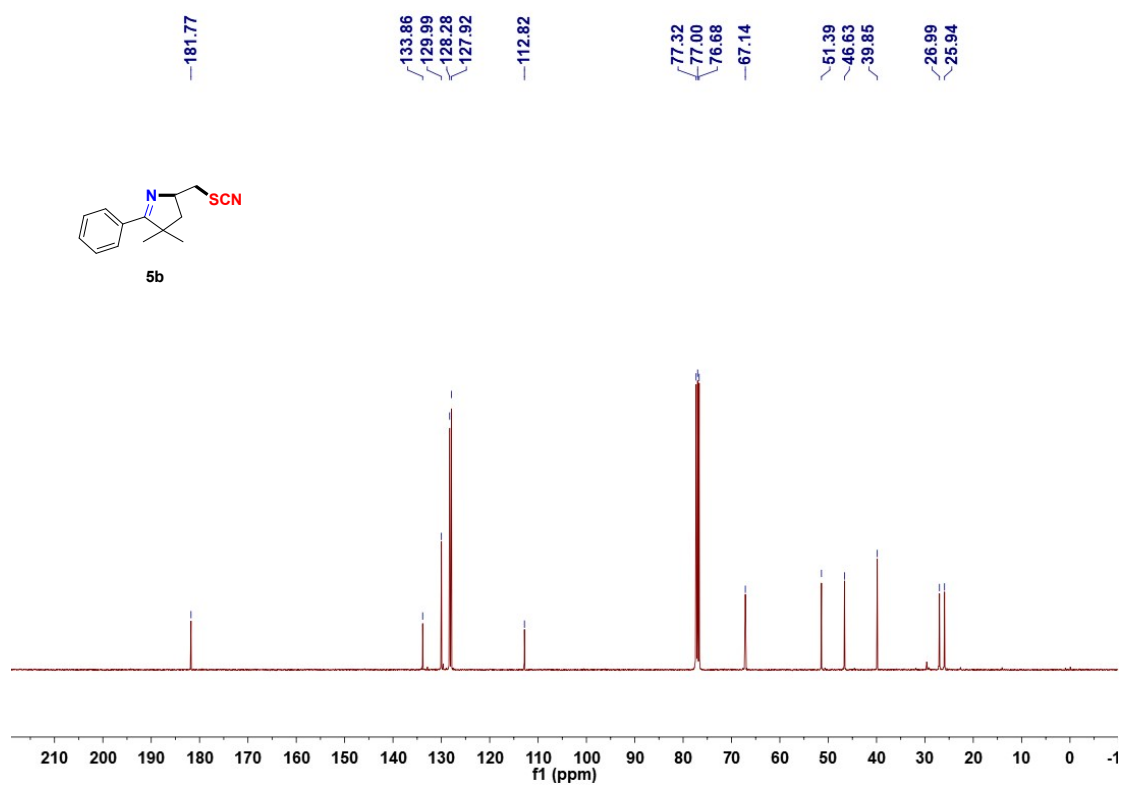

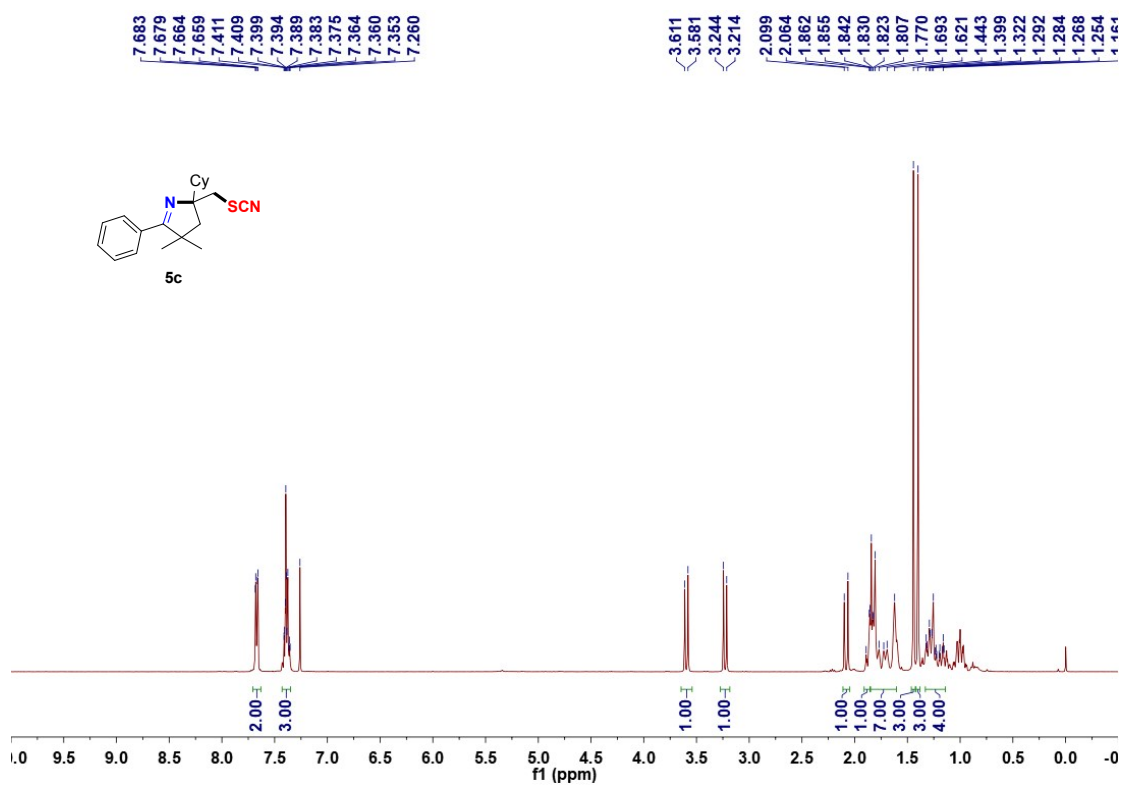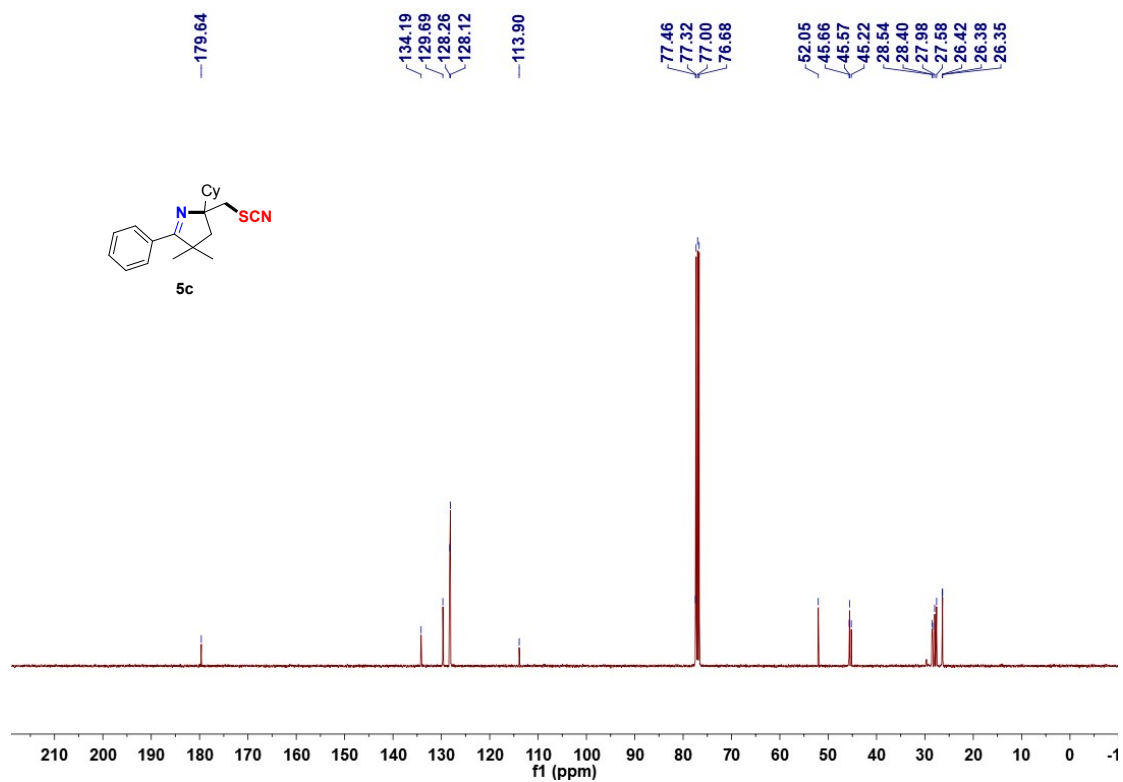

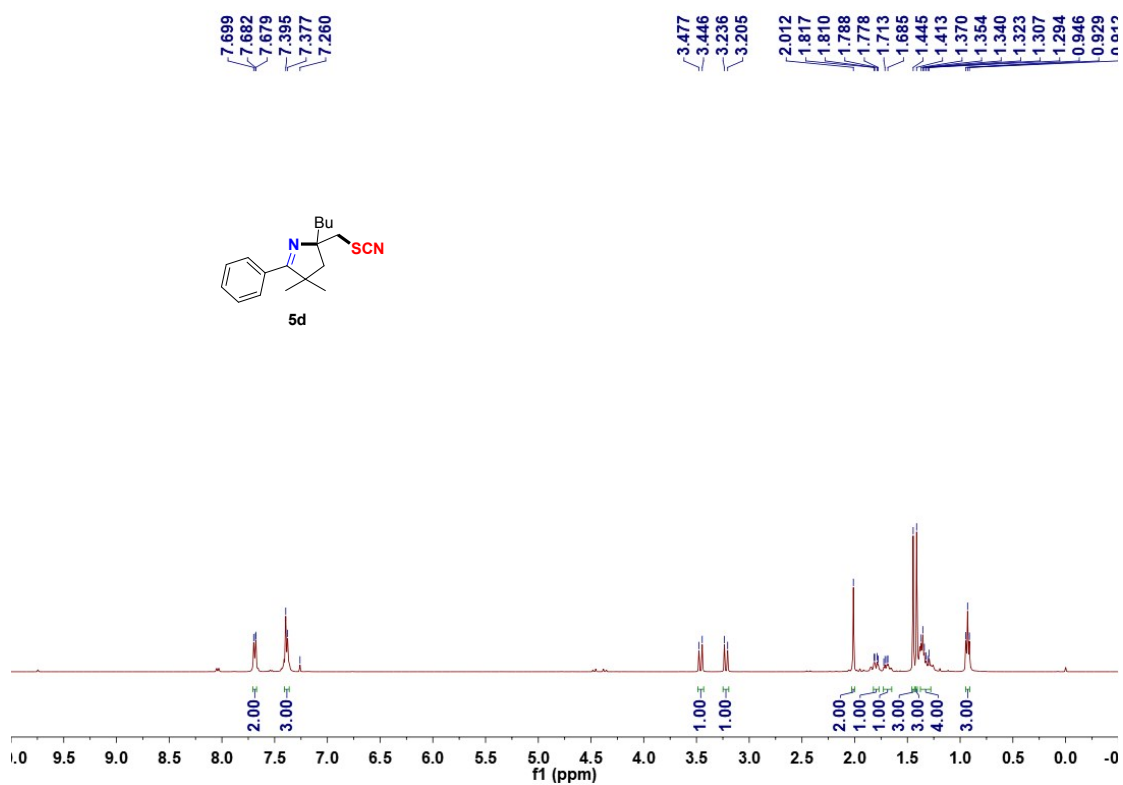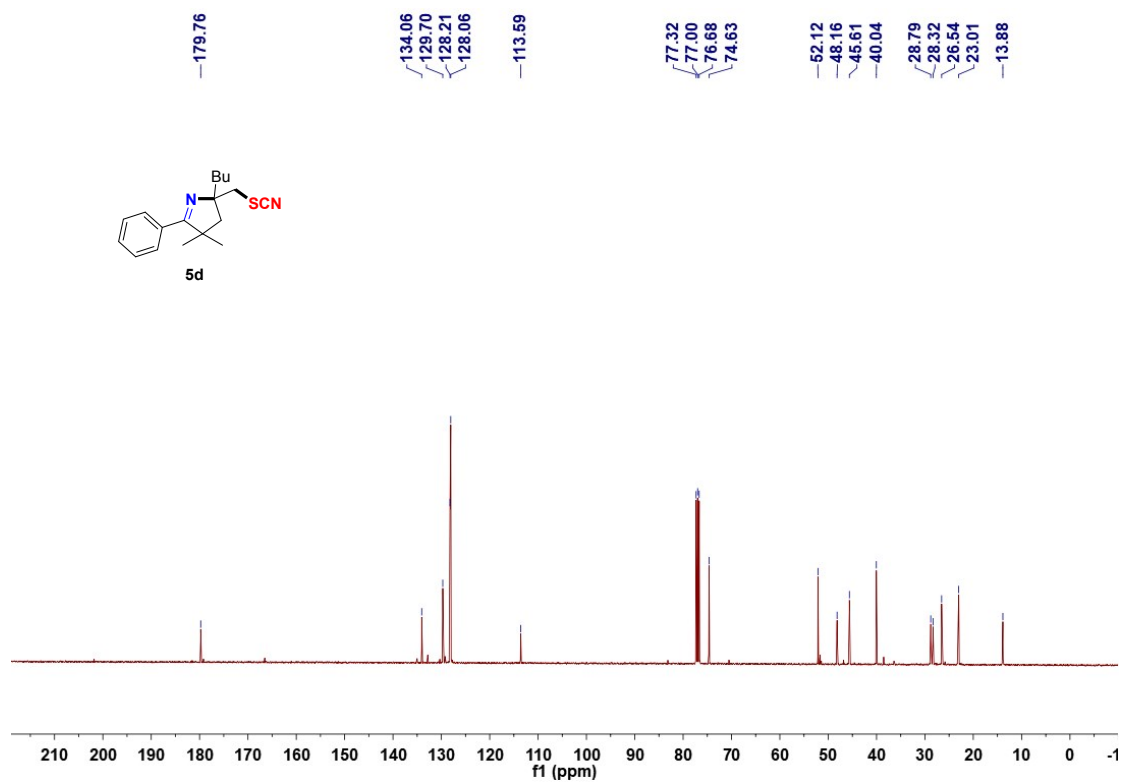

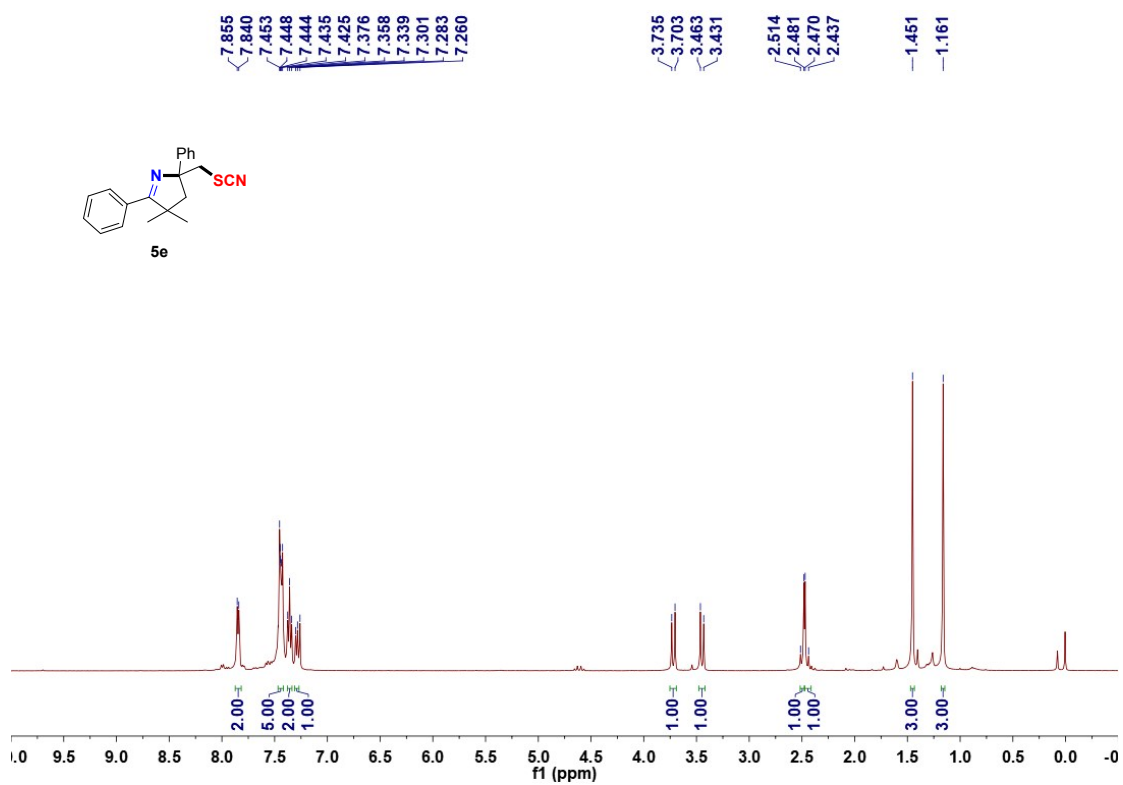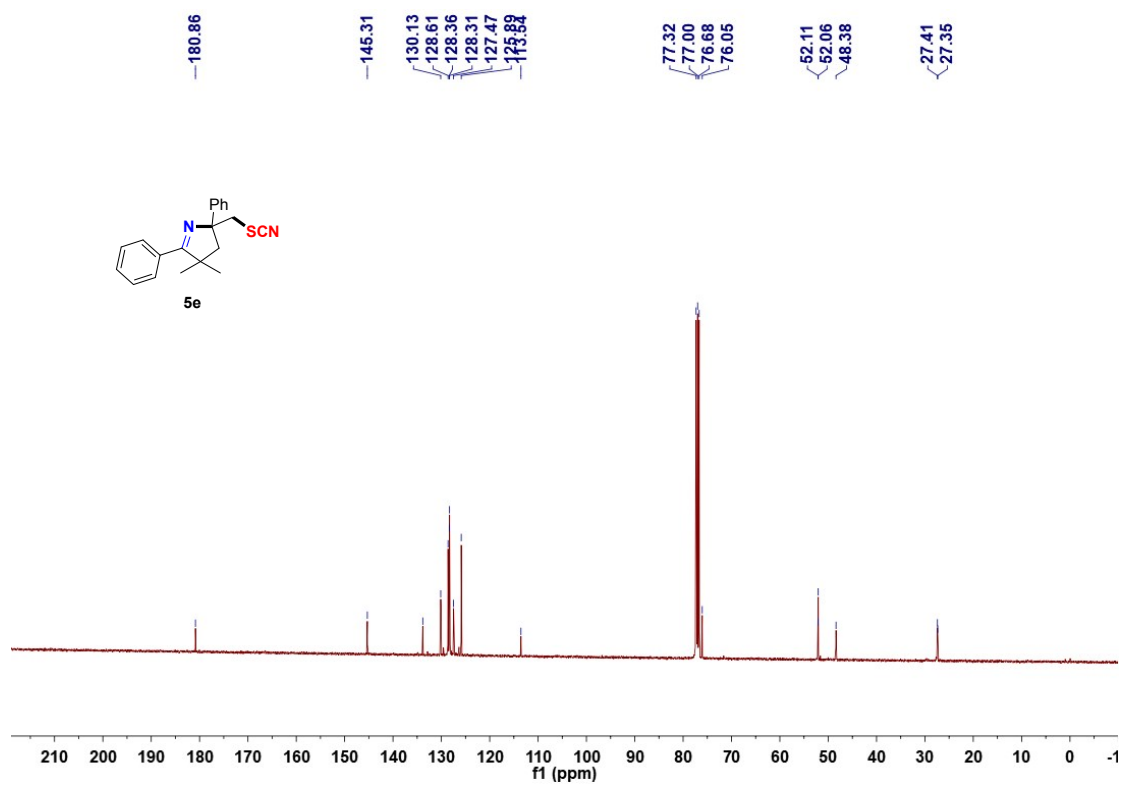

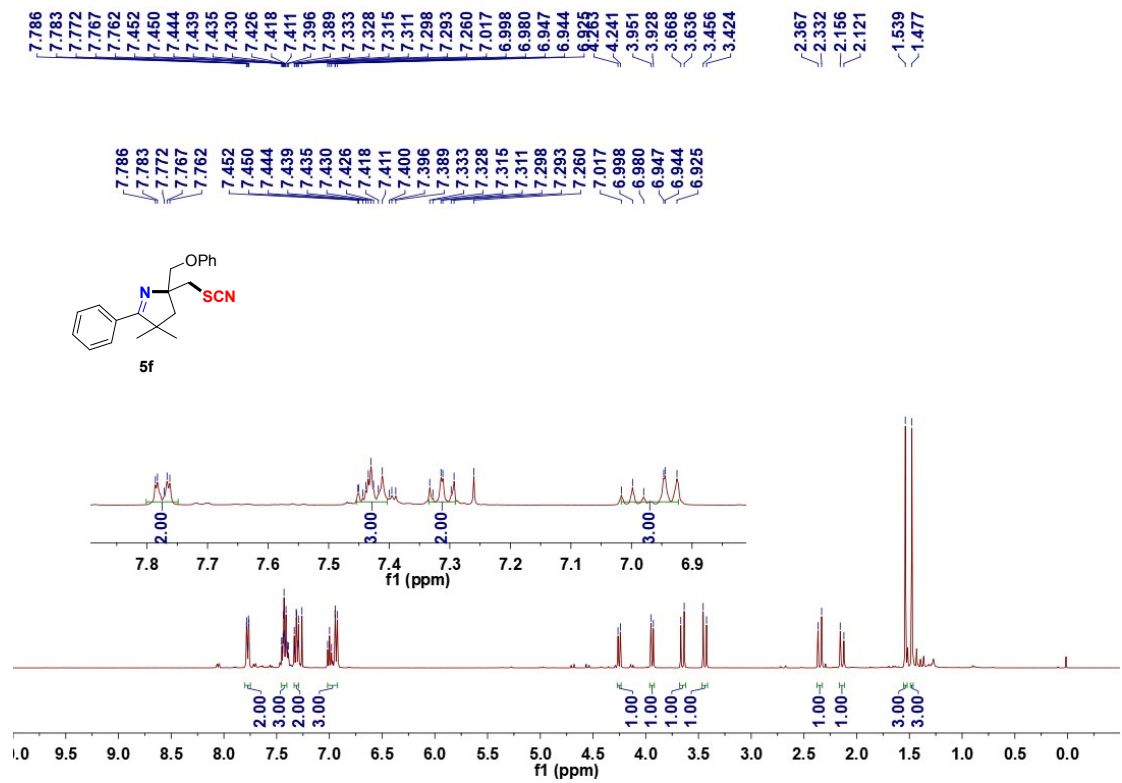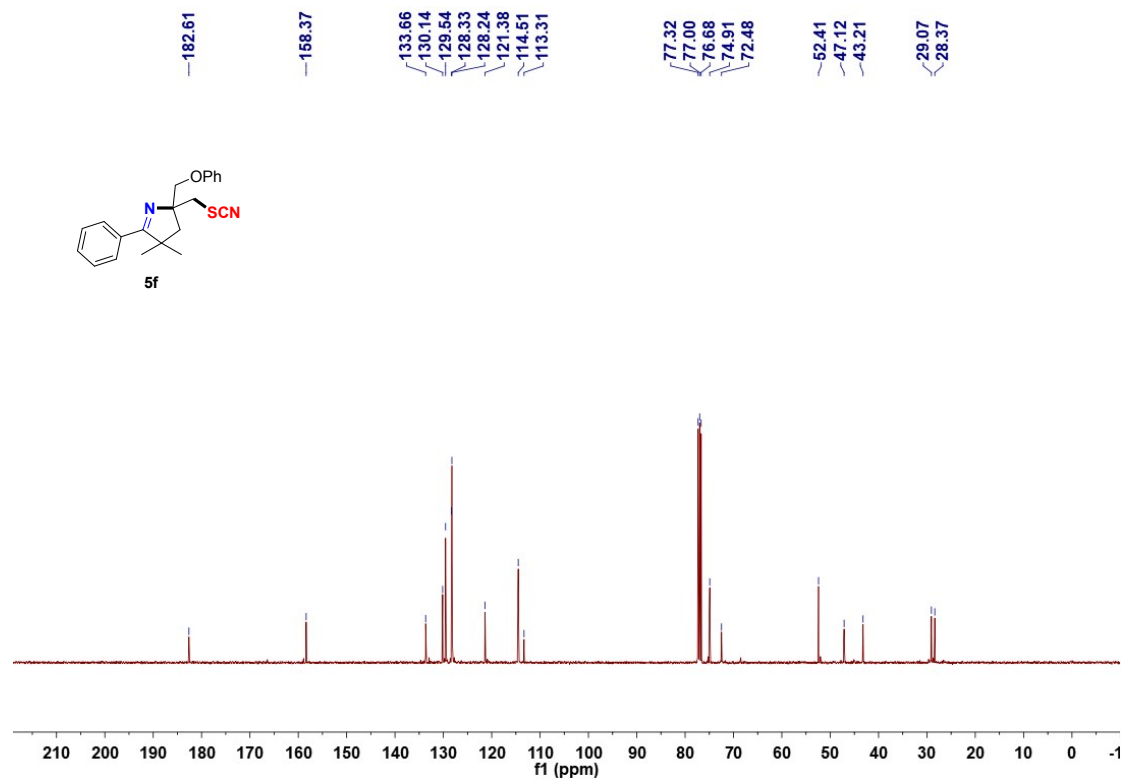

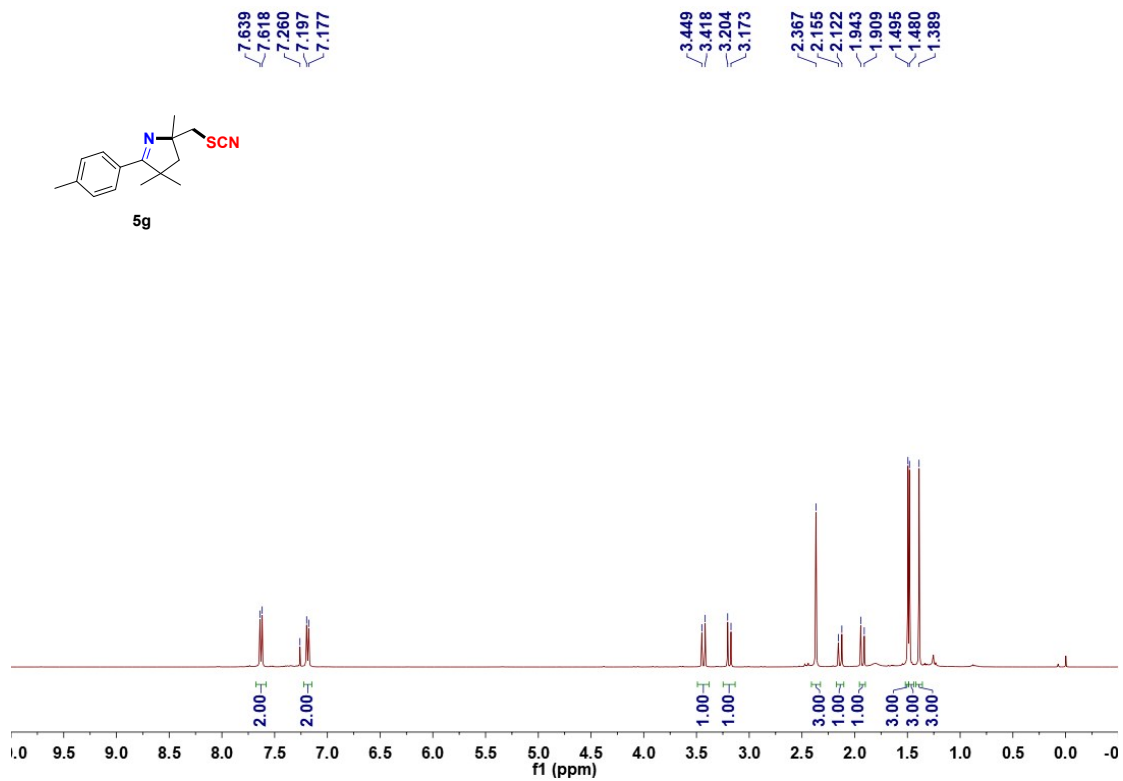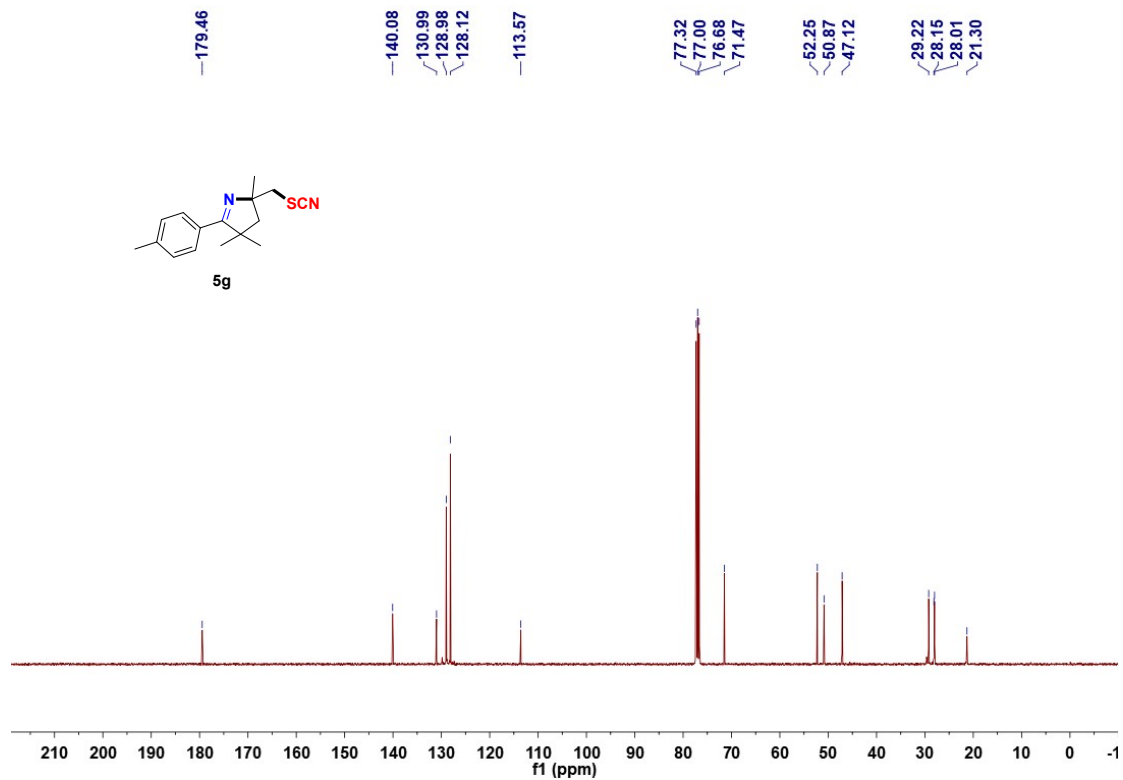

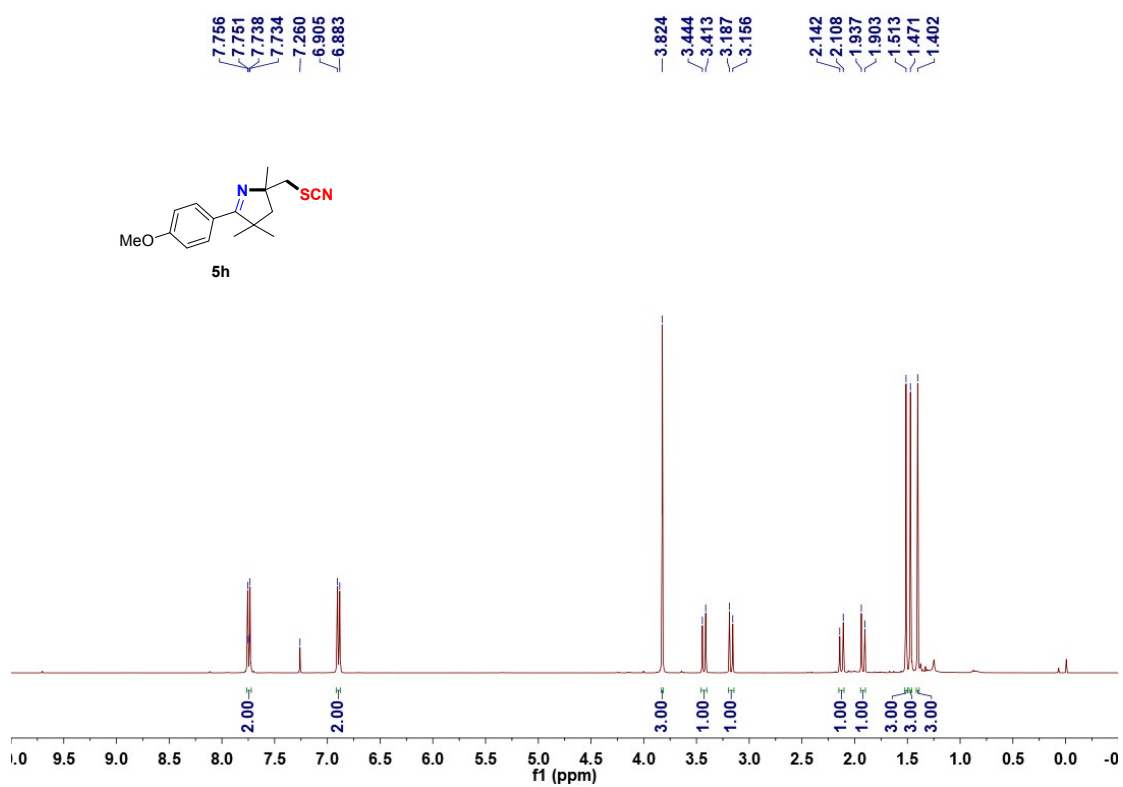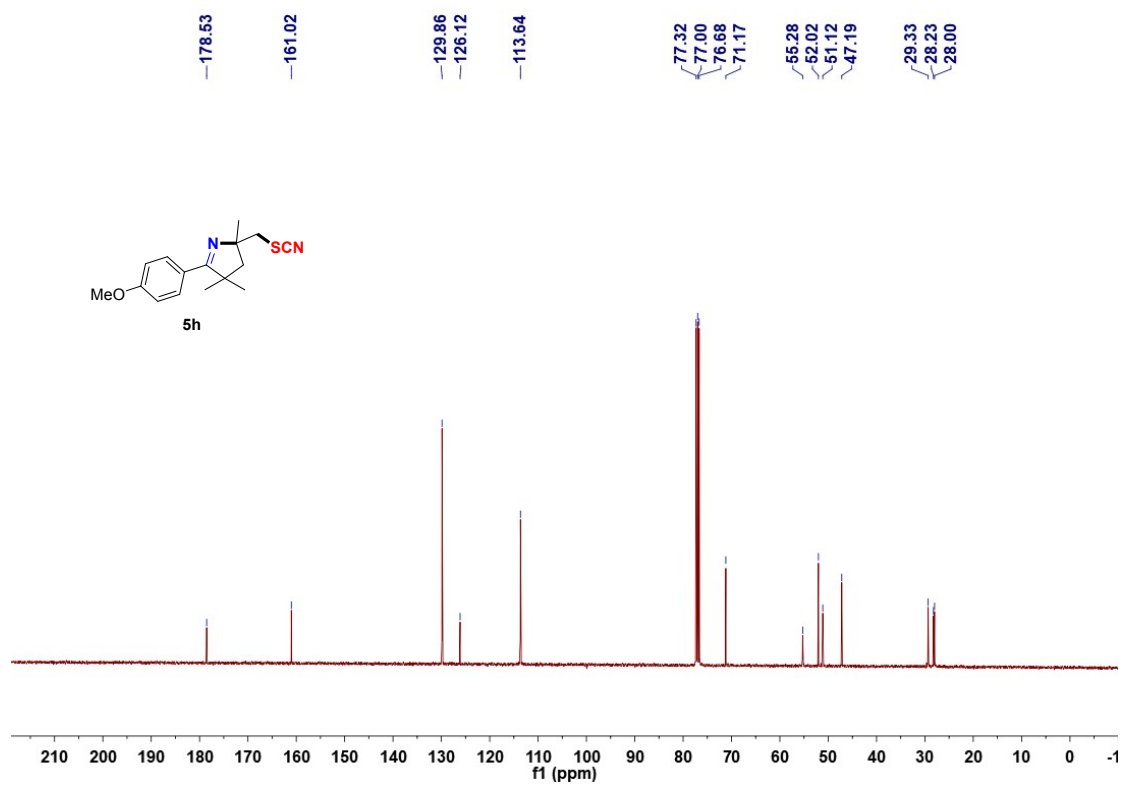

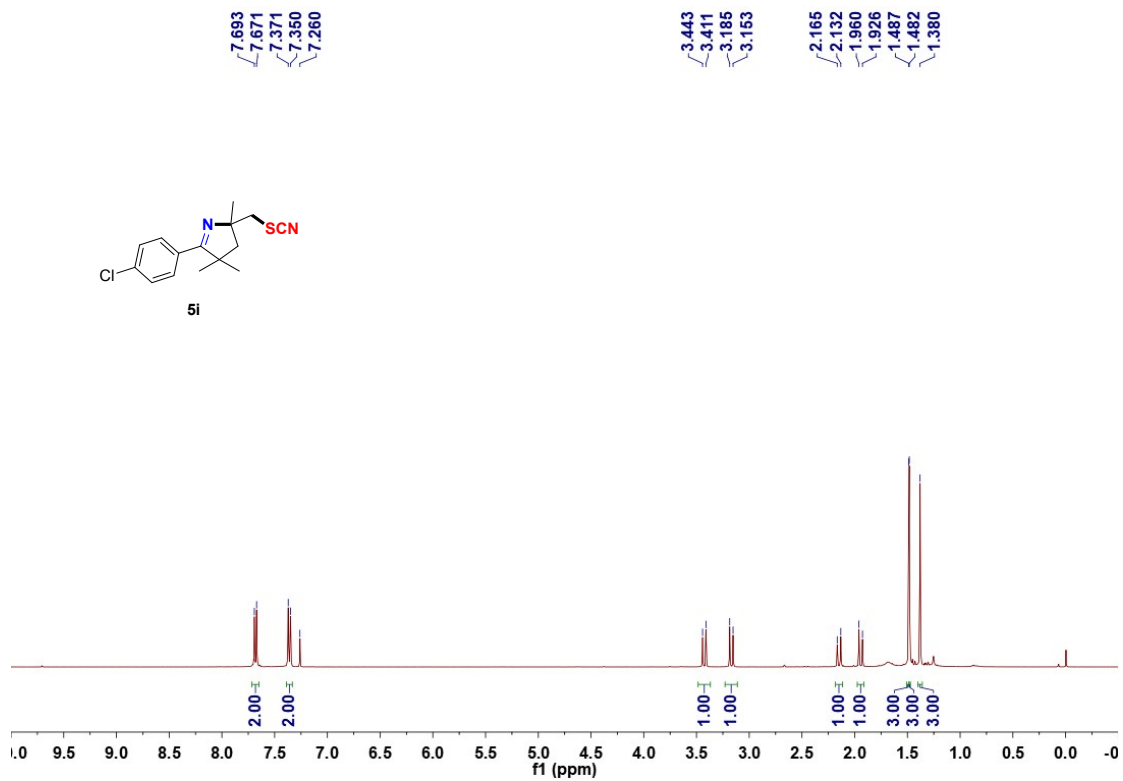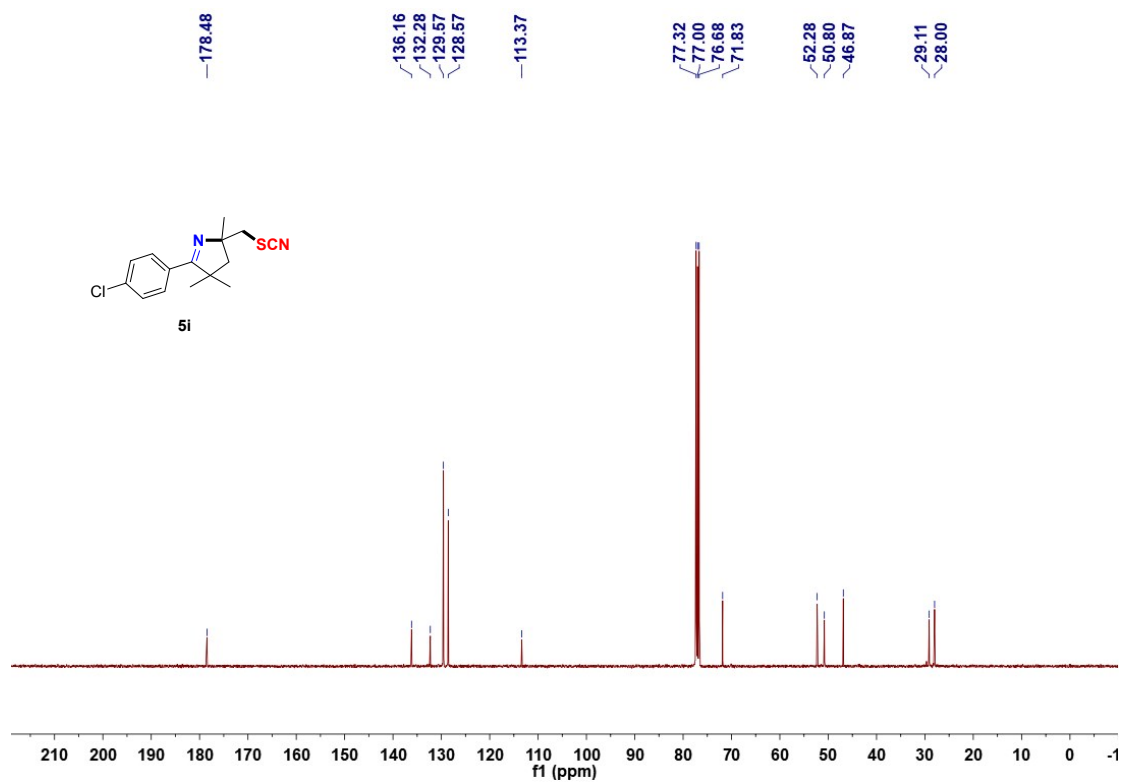

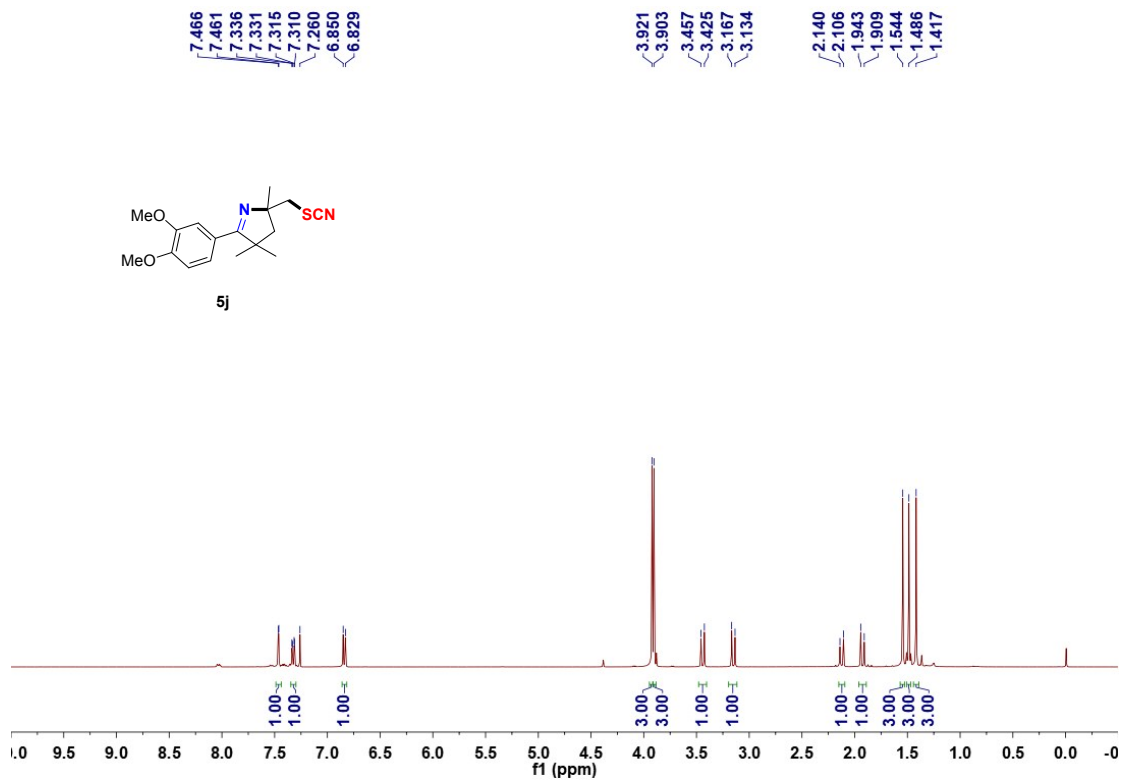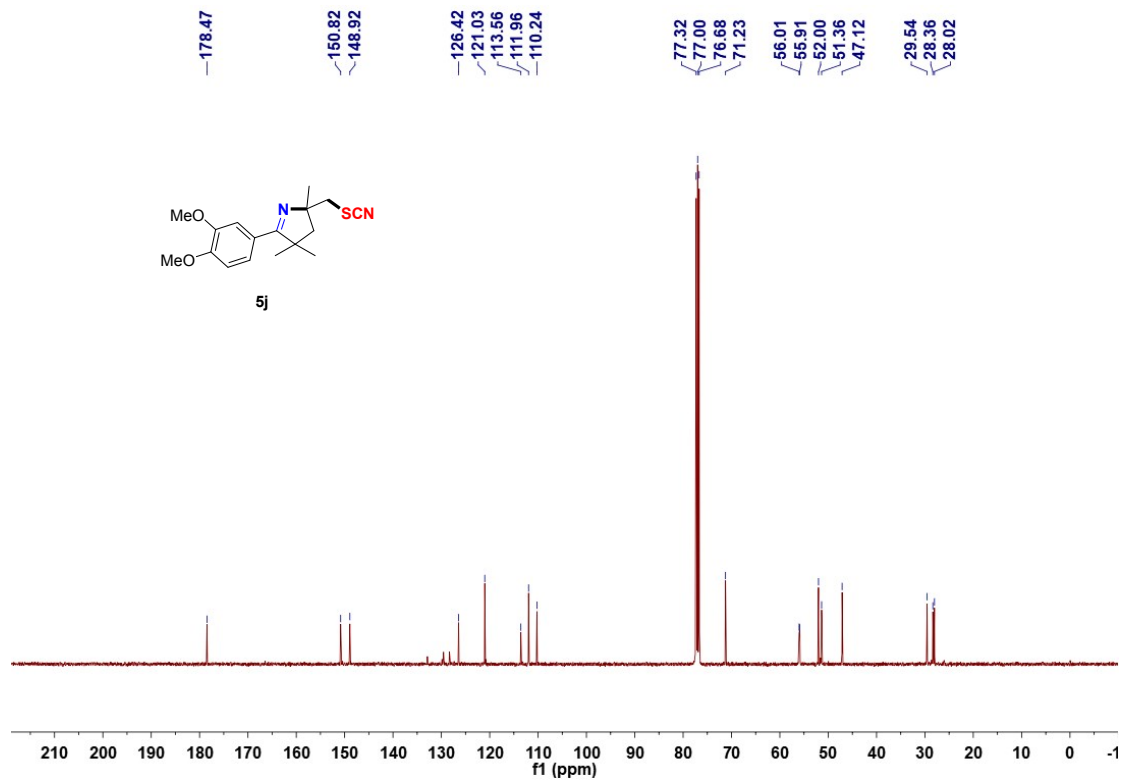

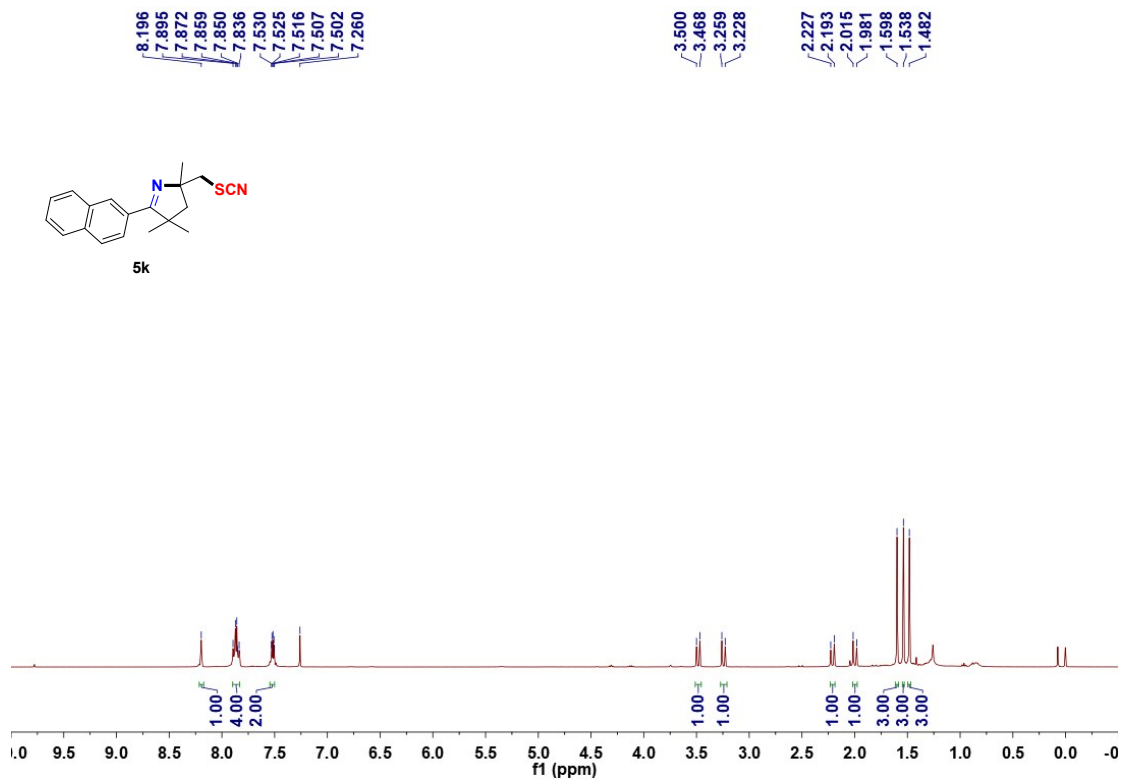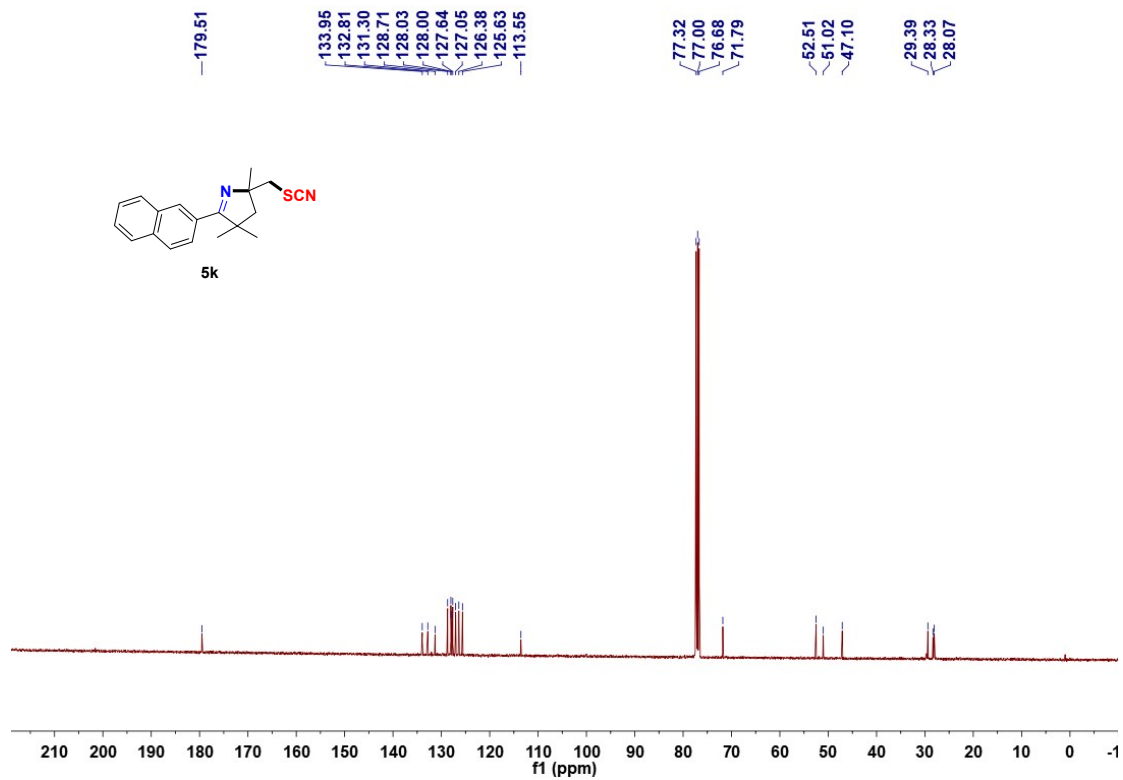

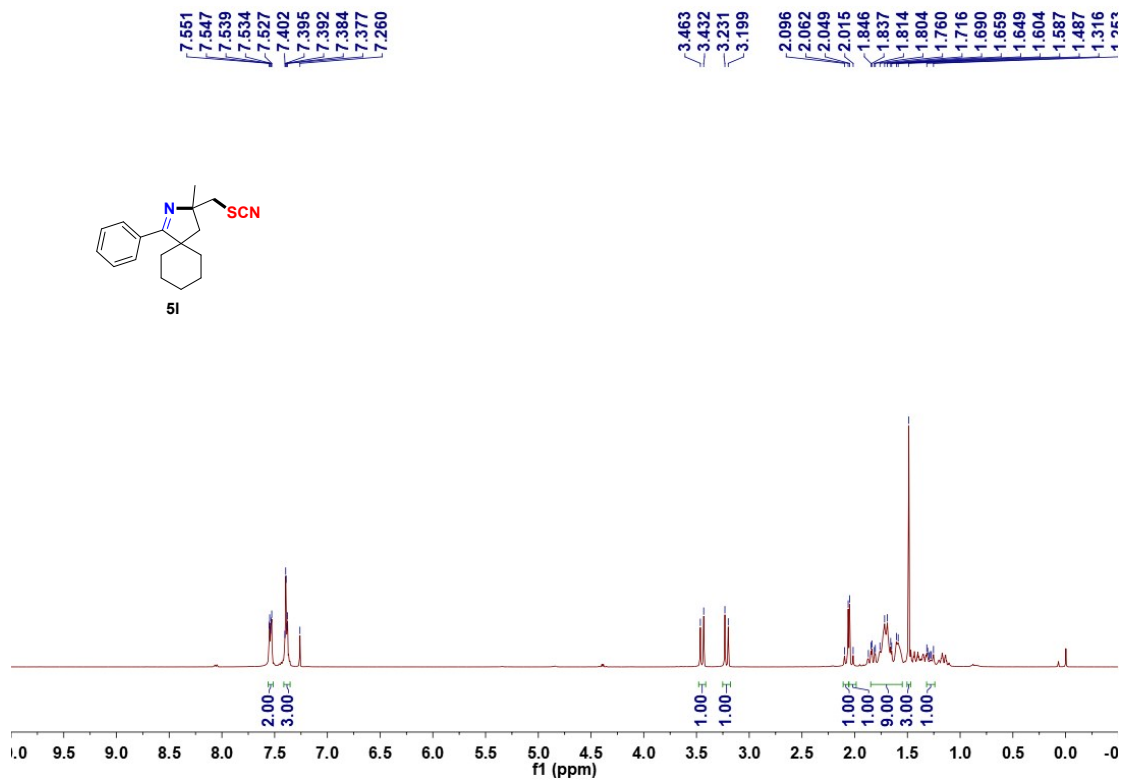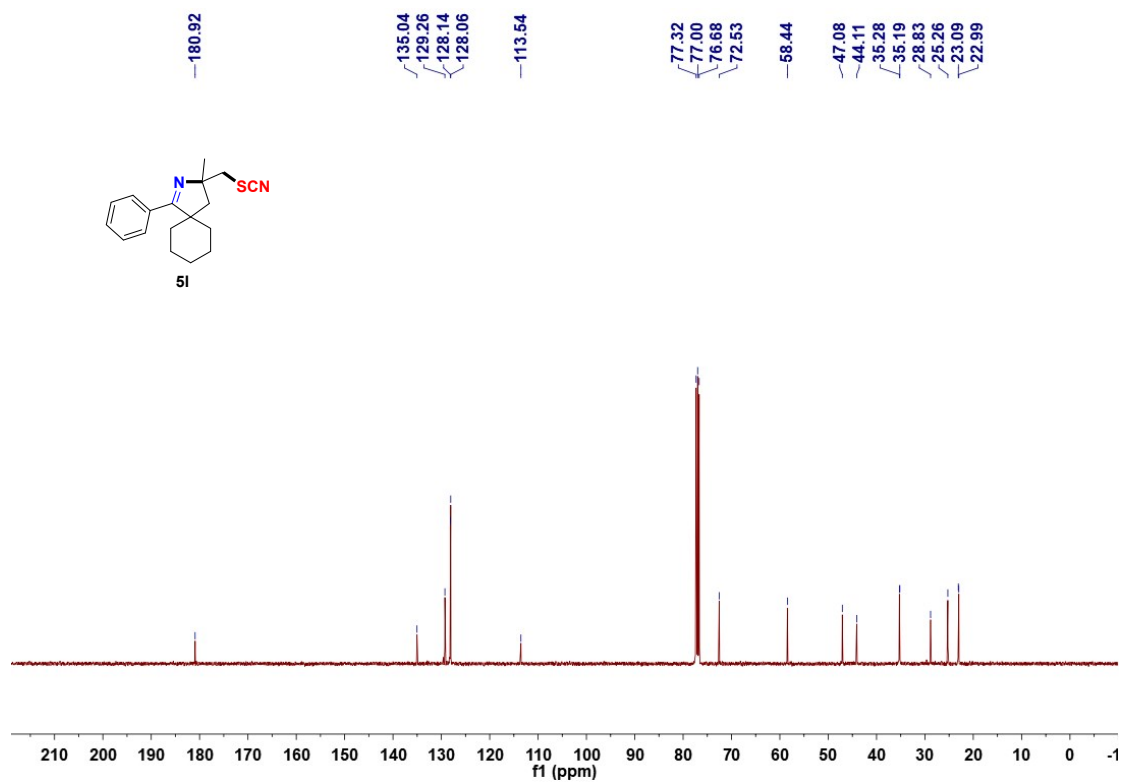

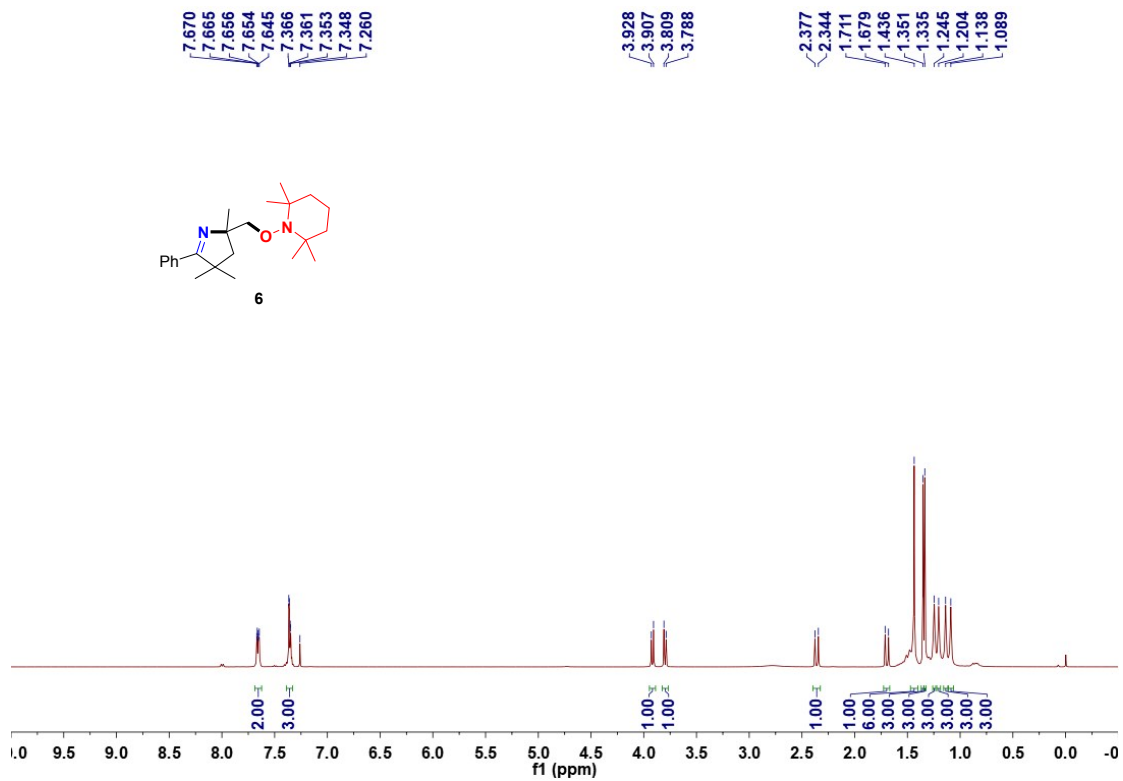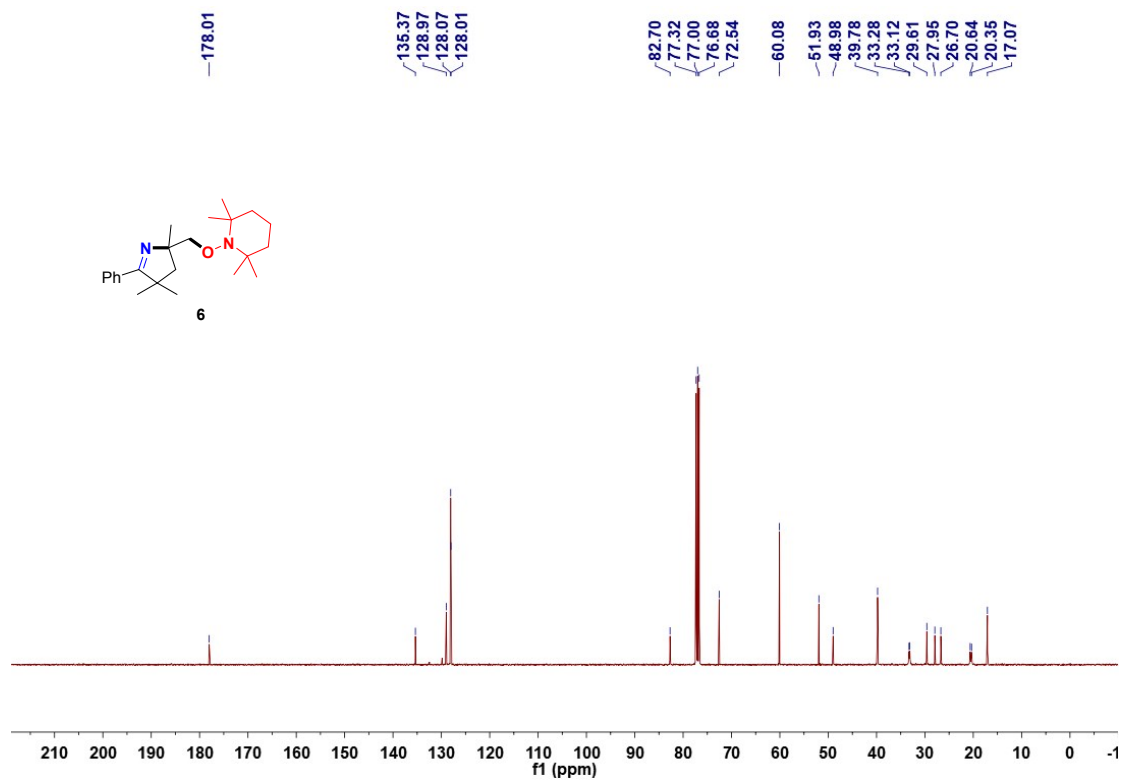

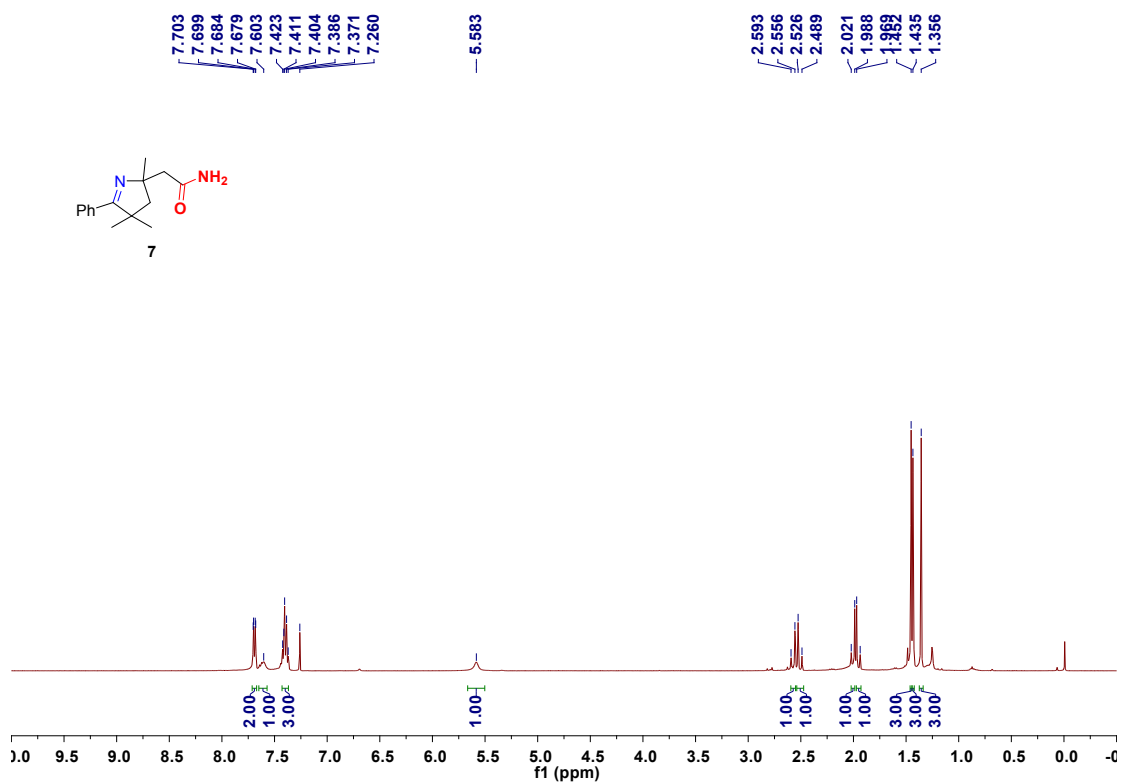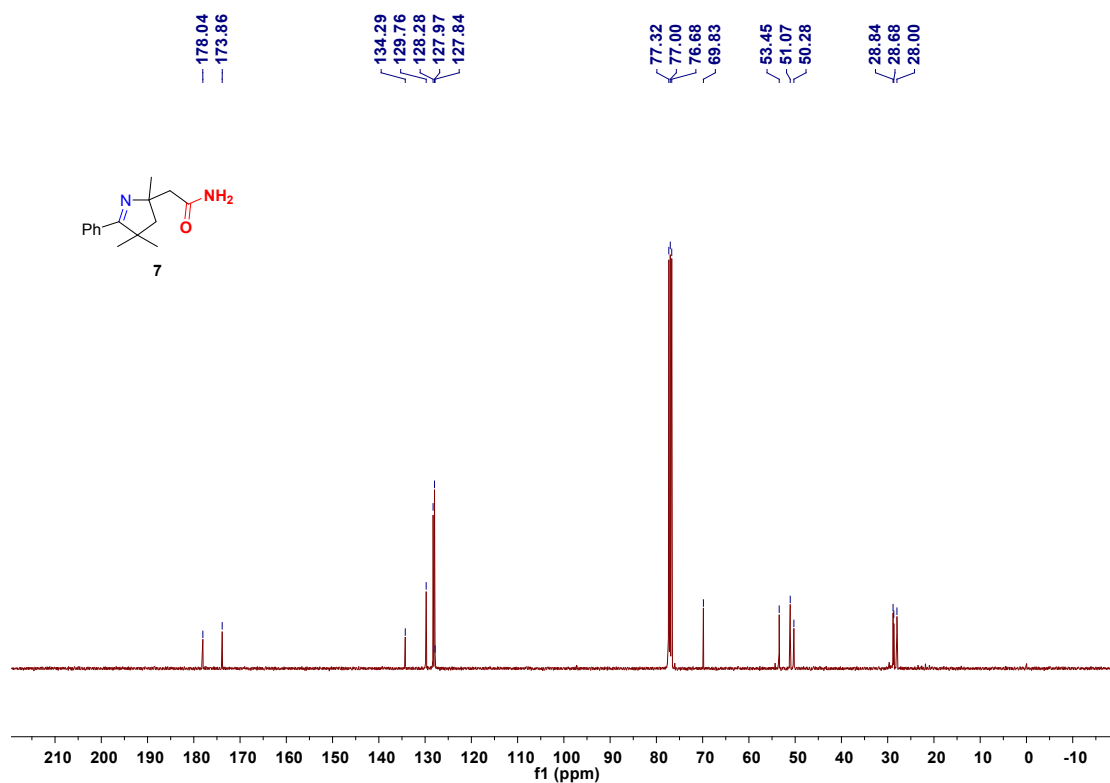

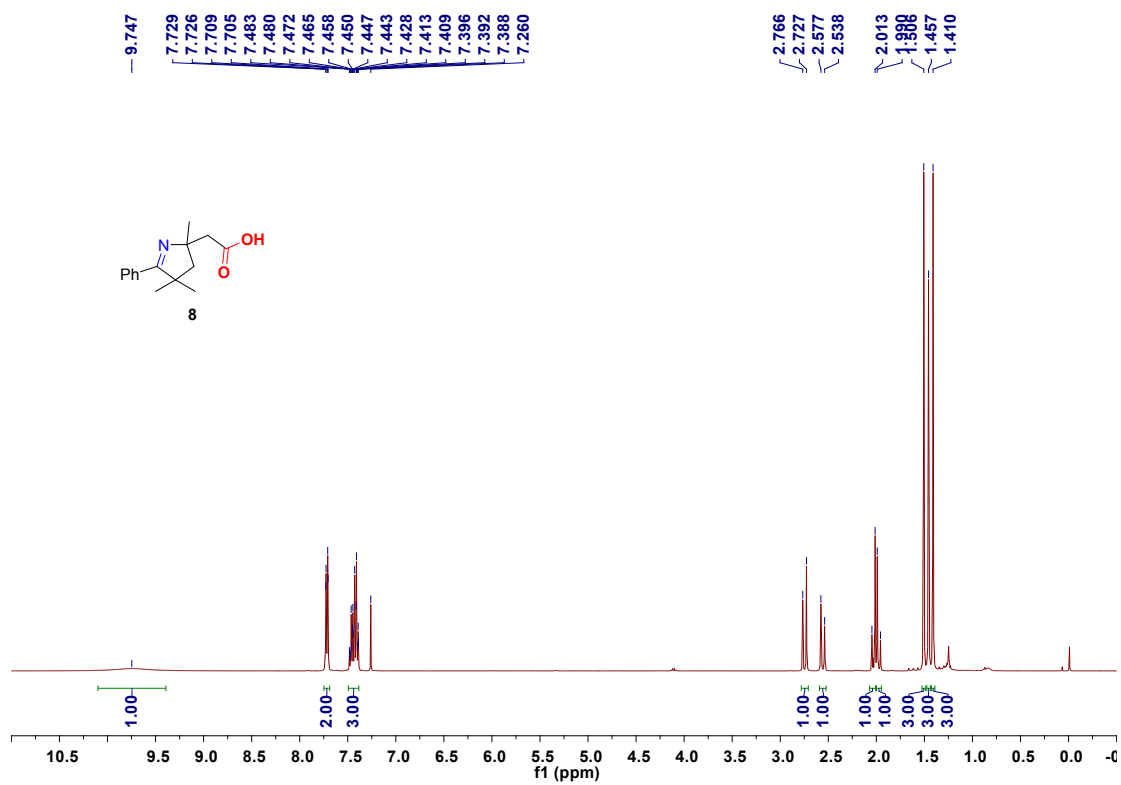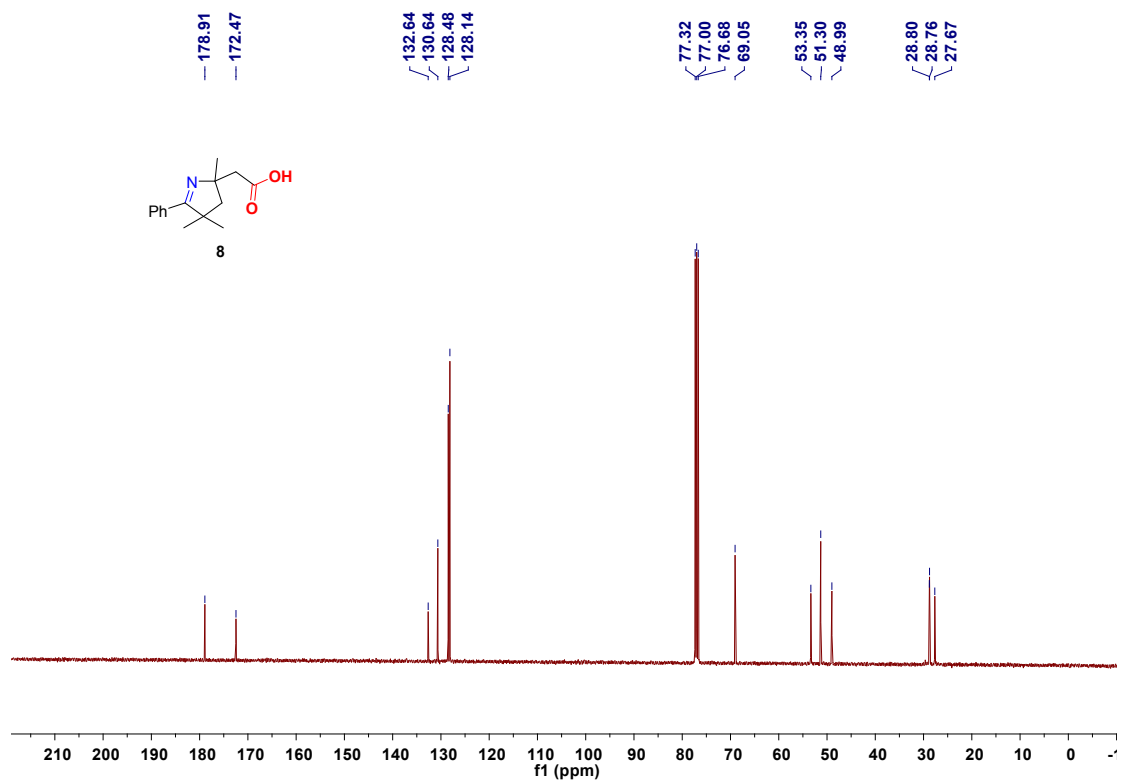

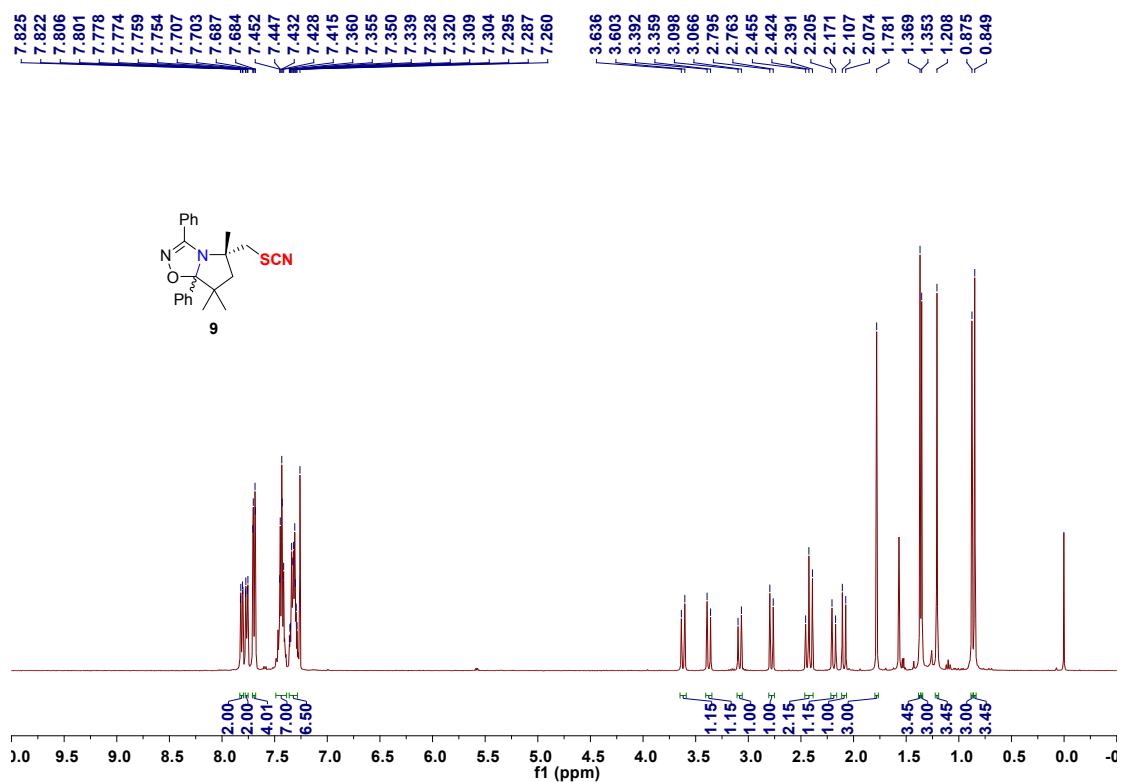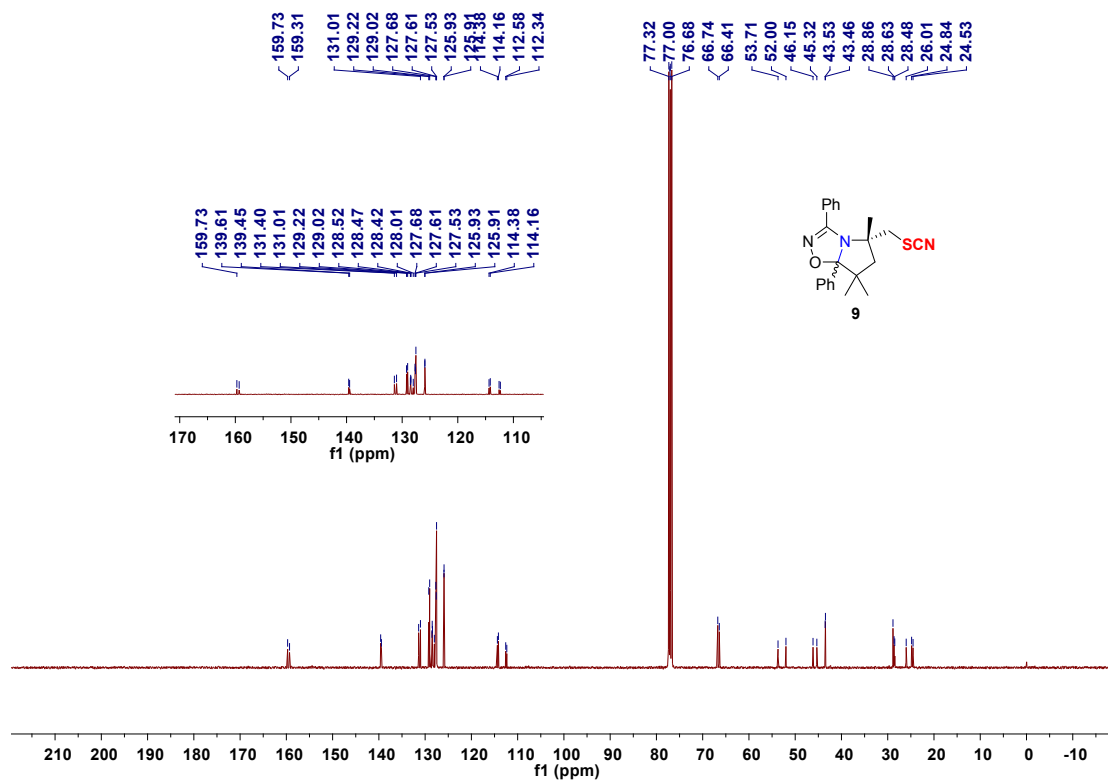

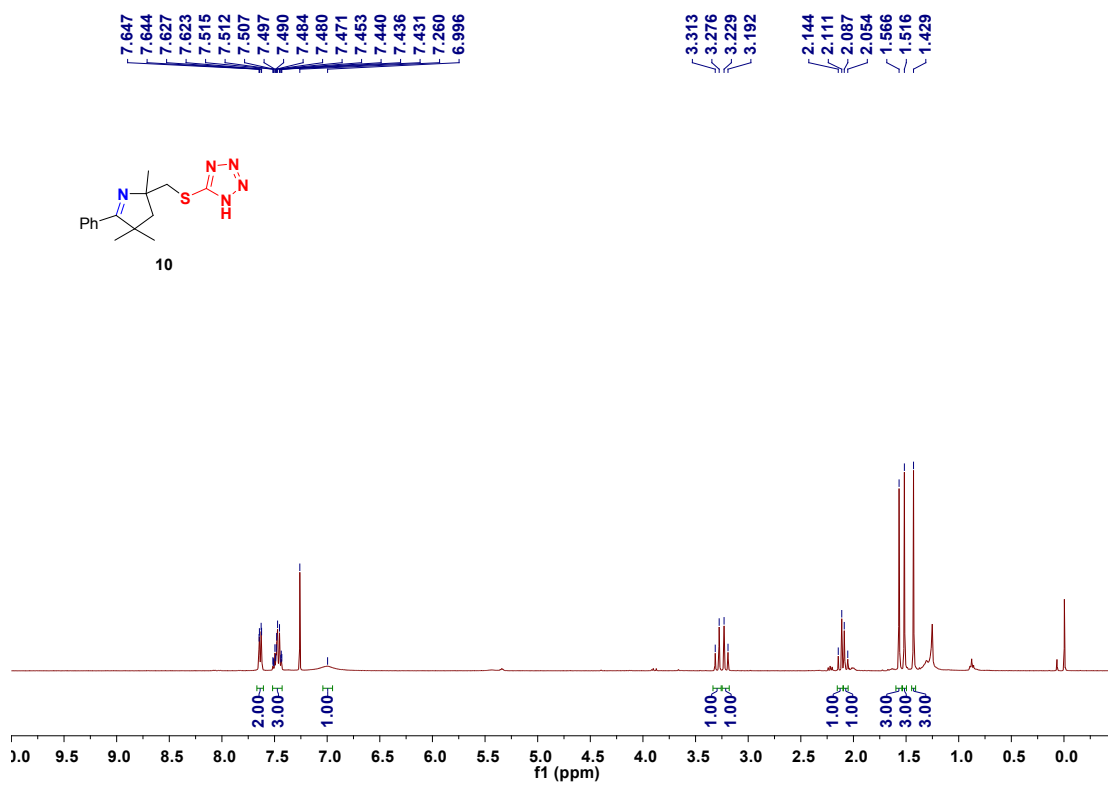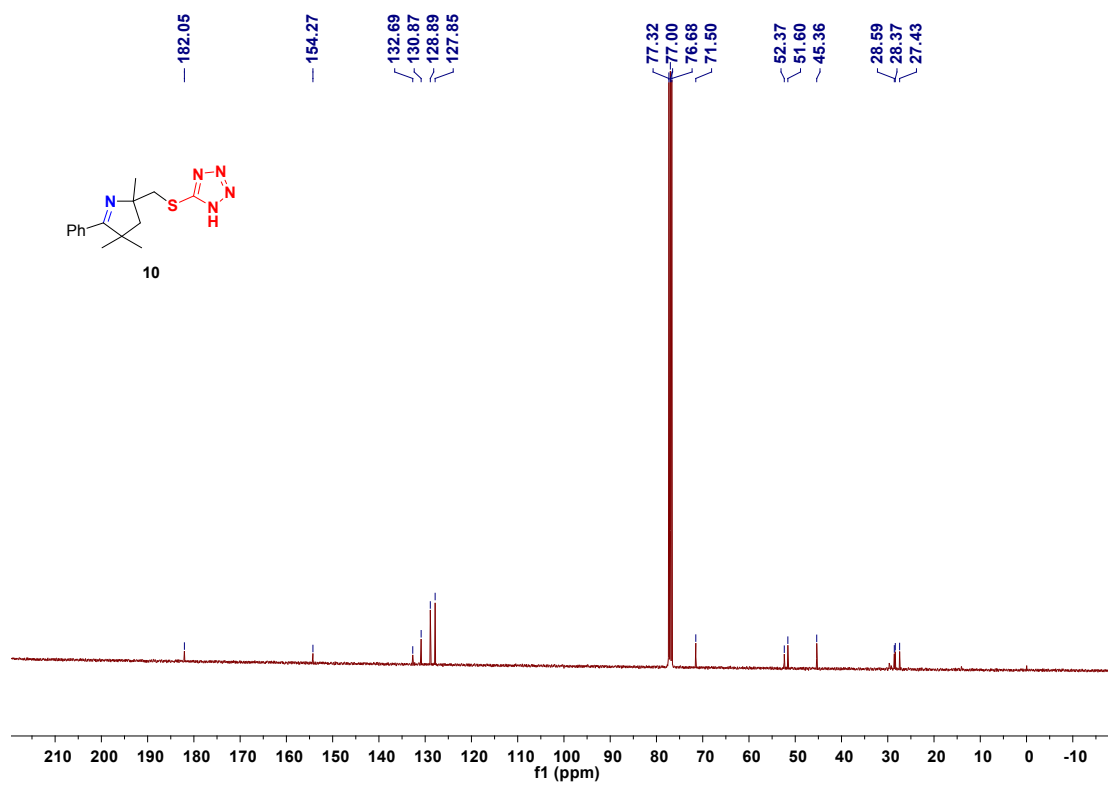

Supplement: c9qo00421a1.pdf [file c9qo00421a1.pdf]
